# Supplementary material for: News trends and web search query of HIV/AIDS in Hong Kong
Source: PLoS One. 2017 Sep 18;12(9):e0185004. doi: 10.1371/journal.pone.0185004 (PMC5602633; doi:10.1371/journal.pone.0185004)
Supplement: S1 Table — (XLSX) [file pone.0185004.s001.xlsx]

## Sheet: Google Trends -HIV
Date	hiv
2004-01-04 - 2004-01-10	39	2005-01-02 - 2005-01-08	32	2006-01-01 - 2006-01-07	26	2006-12-31 - 2007-01-06	33	2007-12-30 - 2008-01-05	42	2008-12-28 - 2009-01-03	37	2010-01-03 - 2010-01-09	36	2011-01-02 - 2011-01-08	28	2012-01-01 - 2012-01-07	21	2013-01-06 - 2013-01-12	31	2014-01-05 - 2014-01-11	21
2004-01-11 - 2004-01-17	55	2005-01-09 - 2005-01-15	36	2006-01-08 - 2006-01-14	51	2007-01-07 - 2007-01-13	31	2008-01-06 - 2008-01-12	46	2009-01-04 - 2009-01-10	41	2010-01-10 - 2010-01-16	38	2011-01-09 - 2011-01-15	23	2012-01-08 - 2012-01-14	25	2013-01-13 - 2013-01-19	25	2014-01-12 - 2014-01-18	43
2004-01-18 - 2004-01-24	57	2005-01-16 - 2005-01-22	39	2006-01-15 - 2006-01-21	58	2007-01-14 - 2007-01-20	44	2008-01-13 - 2008-01-19	50	2009-01-11 - 2009-01-17	38	2010-01-17 - 2010-01-23	43	2011-01-16 - 2011-01-22	21	2012-01-15 - 2012-01-21	17	2013-01-20 - 2013-01-26	26	2014-01-19 - 2014-01-25	25
2004-01-25 - 2004-01-31	22	2005-01-23 - 2005-01-29	30	2006-01-22 - 2006-01-28	41	2007-01-21 - 2007-01-27	39	2008-01-20 - 2008-01-26	34	2009-01-18 - 2009-01-24	34	2010-01-24 - 2010-01-30	32	2011-01-23 - 2011-01-29	17	2012-01-22 - 2012-01-28	24	2013-01-27 - 2013-02-02	18	2014-01-26 - 2014-02-01	20
2004-02-01 - 2004-02-07	45	2005-01-30 - 2005-02-05	31	2006-01-29 - 2006-02-04	36	2007-01-28 - 2007-02-03	47	2008-01-27 - 2008-02-02	39	2009-01-25 - 2009-01-31	31	2010-01-31 - 2010-02-06	33	2011-01-30 - 2011-02-05	25	2012-01-29 - 2012-02-04	15	2013-02-03 - 2013-02-09	17	2014-02-02 - 2014-02-08	25
2004-02-08 - 2004-02-14	21	2005-02-06 - 2005-02-12	41	2006-02-05 - 2006-02-11	43	2007-02-04 - 2007-02-10	27	2008-02-03 - 2008-02-09	28	2009-02-01 - 2009-02-07	30	2010-02-07 - 2010-02-13	18	2011-02-06 - 2011-02-12	25	2012-02-05 - 2012-02-11	26	2013-02-10 - 2013-02-16	16	2014-02-09 - 2014-02-15	19
2004-02-15 - 2004-02-21	58	2005-02-13 - 2005-02-19	43	2006-02-12 - 2006-02-18	43	2007-02-11 - 2007-02-17	22	2008-02-10 - 2008-02-16	29	2009-02-08 - 2009-02-14	35	2010-02-14 - 2010-02-20	32	2011-02-13 - 2011-02-19	20	2012-02-12 - 2012-02-18	21	2013-02-17 - 2013-02-23	24	2014-02-16 - 2014-02-22	27
2004-02-22 - 2004-02-28	33	2005-02-20 - 2005-02-26	40	2006-02-19 - 2006-02-25	31	2007-02-18 - 2007-02-24	29	2008-02-17 - 2008-02-23	29	2009-02-15 - 2009-02-21	53	2010-02-21 - 2010-02-27	21	2011-02-20 - 2011-02-26	27	2012-02-19 - 2012-02-25	22	2013-02-24 - 2013-03-02	18	2014-02-23 - 2014-03-01	20
2004-02-29 - 2004-03-06	64	2005-02-27 - 2005-03-05	44	2006-02-26 - 2006-03-04	56	2007-02-25 - 2007-03-03	36	2008-02-24 - 2008-03-01	38	2009-02-22 - 2009-02-28	43	2010-02-28 - 2010-03-06	30	2011-02-27 - 2011-03-05	36	2012-02-26 - 2012-03-03	26	2013-03-03 - 2013-03-09	41	2014-03-02 - 2014-03-08	22
2004-03-07 - 2004-03-13	46	2005-03-06 - 2005-03-12	42	2006-03-05 - 2006-03-11	45	2007-03-04 - 2007-03-10	38	2008-03-02 - 2008-03-08	44	2009-03-01 - 2009-03-07	24	2010-03-07 - 2010-03-13	36	2011-03-06 - 2011-03-12	31	2012-03-04 - 2012-03-10	21	2013-03-10 - 2013-03-16	29	2014-03-09 - 2014-03-15	29
2004-03-14 - 2004-03-20	44	2005-03-13 - 2005-03-19	43	2006-03-12 - 2006-03-18	45	2007-03-11 - 2007-03-17	44	2008-03-09 - 2008-03-15	47	2009-03-08 - 2009-03-14	41	2010-03-14 - 2010-03-20	41	2011-03-13 - 2011-03-19	28	2012-03-11 - 2012-03-17	33	2013-03-17 - 2013-03-23	25	2014-03-16 - 2014-03-22	29
2004-03-21 - 2004-03-27	34	2005-03-20 - 2005-03-26	50	2006-03-19 - 2006-03-25	41	2007-03-18 - 2007-03-24	40	2008-03-16 - 2008-03-22	29	2009-03-15 - 2009-03-21	24	2010-03-21 - 2010-03-27	47	2011-03-20 - 2011-03-26	26	2012-03-18 - 2012-03-24	31	2013-03-24 - 2013-03-30	23	2014-03-23 - 2014-03-29	16
2004-03-28 - 2004-04-03	56	2005-03-27 - 2005-04-02	35	2006-03-26 - 2006-04-01	55	2007-03-25 - 2007-03-31	42	2008-03-23 - 2008-03-29	32	2009-03-22 - 2009-03-28	44	2010-03-28 - 2010-04-03	26	2011-03-27 - 2011-04-02	29	2012-03-25 - 2012-03-31	32	2013-03-31 - 2013-04-06	28	2014-03-30 - 2014-04-05	27
2004-04-04 - 2004-04-10	92	2005-04-03 - 2005-04-09	58	2006-04-02 - 2006-04-08	33	2007-04-01 - 2007-04-07	22	2008-03-30 - 2008-04-05	31	2009-03-29 - 2009-04-04	37	2010-04-04 - 2010-04-10	43	2011-04-03 - 2011-04-09	39	2012-04-01 - 2012-04-07	26	2013-04-07 - 2013-04-13	21	2014-04-06 - 2014-04-12	31
2004-04-11 - 2004-04-17	77	2005-04-10 - 2005-04-16	73	2006-04-09 - 2006-04-15	62	2007-04-08 - 2007-04-14	42	2008-04-06 - 2008-04-12	34	2009-04-05 - 2009-04-11	33	2010-04-11 - 2010-04-17	28	2011-04-10 - 2011-04-16	22	2012-04-08 - 2012-04-14	35	2013-04-14 - 2013-04-20	23	2014-04-13 - 2014-04-19	24
2004-04-18 - 2004-04-24	47	2005-04-17 - 2005-04-23	27	2006-04-16 - 2006-04-22	33	2007-04-15 - 2007-04-21	26	2008-04-13 - 2008-04-19	33	2009-04-12 - 2009-04-18	33	2010-04-18 - 2010-04-24	33	2011-04-17 - 2011-04-23	28	2012-04-15 - 2012-04-21	26	2013-04-21 - 2013-04-27	25	2014-04-20 - 2014-04-26	21
2004-04-25 - 2004-05-01	41	2005-04-24 - 2005-04-30	26	2006-04-23 - 2006-04-29	28	2007-04-22 - 2007-04-28	28	2008-04-20 - 2008-04-26	44	2009-04-19 - 2009-04-25	34	2010-04-25 - 2010-05-01	28	2011-04-24 - 2011-04-30	30	2012-04-22 - 2012-04-28	22	2013-04-28 - 2013-05-04	23	2014-04-27 - 2014-05-03	25
2004-05-02 - 2004-05-08	27	2005-05-01 - 2005-05-07	28	2006-04-30 - 2006-05-06	66	2007-04-29 - 2007-05-05	31	2008-04-27 - 2008-05-03	43	2009-04-26 - 2009-05-02	34	2010-05-02 - 2010-05-08	24	2011-05-01 - 2011-05-07	35	2012-04-29 - 2012-05-05	22	2013-05-05 - 2013-05-11	20	2014-05-04 - 2014-05-10	38
2004-05-09 - 2004-05-15	58	2005-05-08 - 2005-05-14	52	2006-05-07 - 2006-05-13	21	2007-05-06 - 2007-05-12	24	2008-05-04 - 2008-05-10	29	2009-05-03 - 2009-05-09	36	2010-05-09 - 2010-05-15	33	2011-05-08 - 2011-05-14	18	2012-05-06 - 2012-05-12	21	2013-05-12 - 2013-05-18	15	2014-05-11 - 2014-05-17	26
2004-05-16 - 2004-05-22	18	2005-05-15 - 2005-05-21	41	2006-05-14 - 2006-05-20	31	2007-05-13 - 2007-05-19	28	2008-05-11 - 2008-05-17	28	2009-05-10 - 2009-05-16	51	2010-05-16 - 2010-05-22	53	2011-05-15 - 2011-05-21	29	2012-05-13 - 2012-05-19	25	2013-05-19 - 2013-05-25	18	2014-05-18 - 2014-05-24	24
2004-05-23 - 2004-05-29	42	2005-05-22 - 2005-05-28	36	2006-05-21 - 2006-05-27	31	2007-05-20 - 2007-05-26	25	2008-05-18 - 2008-05-24	44	2009-05-17 - 2009-05-23	27	2010-05-23 - 2010-05-29	37	2011-05-22 - 2011-05-28	22	2012-05-20 - 2012-05-26	31	2013-05-26 - 2013-06-01	18	2014-05-25 - 2014-05-31	33
2004-05-30 - 2004-06-05	29	2005-05-29 - 2005-06-04	32	2006-05-28 - 2006-06-03	53	2007-05-27 - 2007-06-02	33	2008-05-25 - 2008-05-31	37	2009-05-24 - 2009-05-30	25	2010-05-30 - 2010-06-05	30	2011-05-29 - 2011-06-04	26	2012-05-27 - 2012-06-02	22	2013-06-02 - 2013-06-08	20	2014-06-01 - 2014-06-07	27
2004-06-06 - 2004-06-12	35	2005-06-05 - 2005-06-11	27	2006-06-04 - 2006-06-10	35	2007-06-03 - 2007-06-09	33	2008-06-01 - 2008-06-07	28	2009-05-31 - 2009-06-06	25	2010-06-06 - 2010-06-12	23	2011-06-05 - 2011-06-11	33	2012-06-03 - 2012-06-09	21	2013-06-09 - 2013-06-15	19	2014-06-08 - 2014-06-14	21
2004-06-13 - 2004-06-19	42	2005-06-12 - 2005-06-18	49	2006-06-11 - 2006-06-17	21	2007-06-10 - 2007-06-16	52	2008-06-08 - 2008-06-14	32	2009-06-07 - 2009-06-13	31	2010-06-13 - 2010-06-19	20	2011-06-12 - 2011-06-18	31	2012-06-10 - 2012-06-16	25	2013-06-16 - 2013-06-22	23	2014-06-15 - 2014-06-21	20
2004-06-20 - 2004-06-26	49	2005-06-19 - 2005-06-25	27	2006-06-18 - 2006-06-24	25	2007-06-17 - 2007-06-23	47	2008-06-15 - 2008-06-21	33	2009-06-14 - 2009-06-20	34	2010-06-20 - 2010-06-26	36	2011-06-19 - 2011-06-25	30	2012-06-17 - 2012-06-23	17	2013-06-23 - 2013-06-29	22	2014-06-22 - 2014-06-28	24
2004-06-27 - 2004-07-03	18	2005-06-26 - 2005-07-02	33	2006-06-25 - 2006-07-01	38	2007-06-24 - 2007-06-30	21	2008-06-22 - 2008-06-28	25	2009-06-21 - 2009-06-27	37	2010-06-27 - 2010-07-03	18	2011-06-26 - 2011-07-02	26	2012-06-24 - 2012-06-30	21	2013-06-30 - 2013-07-06	20	2014-06-29 - 2014-07-05	27
2004-07-04 - 2004-07-10	24	2005-07-03 - 2005-07-09	28	2006-07-02 - 2006-07-08	36	2007-07-01 - 2007-07-07	30	2008-06-29 - 2008-07-05	39	2009-06-28 - 2009-07-04	15	2010-07-04 - 2010-07-10	17	2011-07-03 - 2011-07-09	20	2012-07-01 - 2012-07-07	22	2013-07-07 - 2013-07-13	25	2014-07-06 - 2014-07-12	29
2004-07-11 - 2004-07-17	51	2005-07-10 - 2005-07-16	49	2006-07-09 - 2006-07-15	32	2007-07-08 - 2007-07-14	55	2008-07-06 - 2008-07-12	24	2009-07-05 - 2009-07-11	17	2010-07-11 - 2010-07-17	24	2011-07-10 - 2011-07-16	18	2012-07-08 - 2012-07-14	21	2013-07-14 - 2013-07-20	19	2014-07-13 - 2014-07-19	26
2004-07-18 - 2004-07-24	52	2005-07-17 - 2005-07-23	48	2006-07-16 - 2006-07-22	53	2007-07-15 - 2007-07-21	31	2008-07-13 - 2008-07-19	24	2009-07-12 - 2009-07-18	46	2010-07-18 - 2010-07-24	23	2011-07-17 - 2011-07-23	28	2012-07-15 - 2012-07-21	25	2013-07-21 - 2013-07-27	14	2014-07-20 - 2014-07-26	25
2004-07-25 - 2004-07-31	59	2005-07-24 - 2005-07-30	24	2006-07-23 - 2006-07-29	38	2007-07-22 - 2007-07-28	36	2008-07-20 - 2008-07-26	35	2009-07-19 - 2009-07-25	26	2010-07-25 - 2010-07-31	24	2011-07-24 - 2011-07-30	27	2012-07-22 - 2012-07-28	24	2013-07-28 - 2013-08-03	15	2014-07-27 - 2014-08-02	25
2004-08-01 - 2004-08-07	41	2005-07-31 - 2005-08-06	44	2006-07-30 - 2006-08-05	16	2007-07-29 - 2007-08-04	31	2008-07-27 - 2008-08-02	24	2009-07-26 - 2009-08-01	32	2010-08-01 - 2010-08-07	25	2011-07-31 - 2011-08-06	24	2012-07-29 - 2012-08-04	24	2013-08-04 - 2013-08-10	24	2014-08-03 - 2014-08-09	23
2004-08-08 - 2004-08-14	46	2005-08-07 - 2005-08-13	51	2006-08-06 - 2006-08-12	48	2007-08-05 - 2007-08-11	16	2008-08-03 - 2008-08-09	29	2009-08-02 - 2009-08-08	28	2010-08-08 - 2010-08-14	27	2011-08-07 - 2011-08-13	21	2012-08-05 - 2012-08-11	16	2013-08-11 - 2013-08-17	20	2014-08-10 - 2014-08-16	28
2004-08-15 - 2004-08-21	40	2005-08-14 - 2005-08-20	28	2006-08-13 - 2006-08-19	34	2007-08-12 - 2007-08-18	39	2008-08-10 - 2008-08-16	34	2009-08-09 - 2009-08-15	27	2010-08-15 - 2010-08-21	31	2011-08-14 - 2011-08-20	28	2012-08-12 - 2012-08-18	23	2013-08-18 - 2013-08-24	17	2014-08-17 - 2014-08-23	26
2004-08-22 - 2004-08-28	51	2005-08-21 - 2005-08-27	31	2006-08-20 - 2006-08-26	43	2007-08-19 - 2007-08-25	38	2008-08-17 - 2008-08-23	24	2009-08-16 - 2009-08-22	23	2010-08-22 - 2010-08-28	24	2011-08-21 - 2011-08-27	21	2012-08-19 - 2012-08-25	21	2013-08-25 - 2013-08-31	20	2014-08-24 - 2014-08-30	26
2004-08-29 - 2004-09-04	22	2005-08-28 - 2005-09-03	78	2006-08-27 - 2006-09-02	33	2007-08-26 - 2007-09-01	33	2008-08-24 - 2008-08-30	42	2009-08-23 - 2009-08-29	32	2010-08-29 - 2010-09-04	24	2011-08-28 - 2011-09-03	28	2012-08-26 - 2012-09-01	25	2013-09-01 - 2013-09-07	28	2014-08-31 - 2014-09-06	24
2004-09-05 - 2004-09-11	28	2005-09-04 - 2005-09-10	68	2006-09-03 - 2006-09-09	67	2007-09-02 - 2007-09-08	42	2008-08-31 - 2008-09-06	47	2009-08-30 - 2009-09-05	28	2010-09-05 - 2010-09-11	19	2011-09-04 - 2011-09-10	26	2012-09-02 - 2012-09-08	27	2013-09-08 - 2013-09-14	32	2014-09-07 - 2014-09-13	19
2004-09-12 - 2004-09-18	50	2005-09-11 - 2005-09-17	74	2006-09-10 - 2006-09-16	41	2007-09-09 - 2007-09-15	51	2008-09-07 - 2008-09-13	29	2009-09-06 - 2009-09-12	27	2010-09-12 - 2010-09-18	31	2011-09-11 - 2011-09-17	36	2012-09-09 - 2012-09-15	24	2013-09-15 - 2013-09-21	33	2014-09-14 - 2014-09-20	26
2004-09-19 - 2004-09-25	33	2005-09-18 - 2005-09-24	46	2006-09-17 - 2006-09-23	60	2007-09-16 - 2007-09-22	40	2008-09-14 - 2008-09-20	55	2009-09-13 - 2009-09-19	28	2010-09-19 - 2010-09-25	33	2011-09-18 - 2011-09-24	36	2012-09-16 - 2012-09-22	22	2013-09-22 - 2013-09-28	25	2014-09-21 - 2014-09-27	19
2004-09-26 - 2004-10-02	71	2005-09-25 - 2005-10-01	18	2006-09-24 - 2006-09-30	60	2007-09-23 - 2007-09-29	51	2008-09-21 - 2008-09-27	30	2009-09-20 - 2009-09-26	41	2010-09-26 - 2010-10-02	28	2011-09-25 - 2011-10-01	28	2012-09-23 - 2012-09-29	23	2013-09-29 - 2013-10-05	23	2014-09-28 - 2014-10-04	17
2004-10-03 - 2004-10-09	44	2005-10-02 - 2005-10-08	53	2006-10-01 - 2006-10-07	61	2007-09-30 - 2007-10-06	35	2008-09-28 - 2008-10-04	31	2009-09-27 - 2009-10-03	34	2010-10-03 - 2010-10-09	30	2011-10-02 - 2011-10-08	28	2012-09-30 - 2012-10-06	29	2013-10-06 - 2013-10-12	24	2014-10-05 - 2014-10-11	25
2004-10-10 - 2004-10-16	51	2005-10-09 - 2005-10-15	47	2006-10-08 - 2006-10-14	35	2007-10-07 - 2007-10-13	39	2008-10-05 - 2008-10-11	43	2009-10-04 - 2009-10-10	32	2010-10-10 - 2010-10-16	40	2011-10-09 - 2011-10-15	24	2012-10-07 - 2012-10-13	29	2013-10-13 - 2013-10-19	22	2014-10-12 - 2014-10-18	24
2004-10-17 - 2004-10-23	33	2005-10-16 - 2005-10-22	37	2006-10-15 - 2006-10-21	37	2007-10-14 - 2007-10-20	43	2008-10-12 - 2008-10-18	40	2009-10-11 - 2009-10-17	31	2010-10-17 - 2010-10-23	36	2011-10-16 - 2011-10-22	17	2012-10-14 - 2012-10-20	19	2013-10-20 - 2013-10-26	21	2014-10-19 - 2014-10-25	23
2004-10-24 - 2004-10-30	49	2005-10-23 - 2005-10-29	50	2006-10-22 - 2006-10-28	51	2007-10-21 - 2007-10-27	41	2008-10-19 - 2008-10-25	40	2009-10-18 - 2009-10-24	39	2010-10-24 - 2010-10-30	29	2011-10-23 - 2011-10-29	20	2012-10-21 - 2012-10-27	20	2013-10-27 - 2013-11-02	19	2014-10-26 - 2014-11-01	26
2004-10-31 - 2004-11-06	53	2005-10-30 - 2005-11-05	58	2006-10-29 - 2006-11-04	27	2007-10-28 - 2007-11-03	42	2008-10-26 - 2008-11-01	28	2009-10-25 - 2009-10-31	40	2010-10-31 - 2010-11-06	29	2011-10-30 - 2011-11-05	26	2012-10-28 - 2012-11-03	27	2013-11-03 - 2013-11-09	21	2014-11-02 - 2014-11-08	22
2004-11-07 - 2004-11-13	90	2005-11-06 - 2005-11-12	49	2006-11-05 - 2006-11-11	51	2007-11-04 - 2007-11-10	55	2008-11-02 - 2008-11-08	38	2009-11-01 - 2009-11-07	55	2010-11-07 - 2010-11-13	36	2011-11-06 - 2011-11-12	28	2012-11-04 - 2012-11-10	24	2013-11-10 - 2013-11-16	25	2014-11-09 - 2014-11-15	27
2004-11-14 - 2004-11-20	61	2005-11-13 - 2005-11-19	68	2006-11-12 - 2006-11-18	52	2007-11-11 - 2007-11-17	45	2008-11-09 - 2008-11-15	51	2009-11-08 - 2009-11-14	44	2010-11-14 - 2010-11-20	28	2011-11-13 - 2011-11-19	34	2012-11-11 - 2012-11-17	21	2013-11-17 - 2013-11-23	25	2014-11-16 - 2014-11-22	21
2004-11-21 - 2004-11-27	47	2005-11-20 - 2005-11-26	44	2006-11-19 - 2006-11-25	30	2007-11-18 - 2007-11-24	47	2008-11-16 - 2008-11-22	28	2009-11-15 - 2009-11-21	24	2010-11-21 - 2010-11-27	34	2011-11-20 - 2011-11-26	21	2012-11-18 - 2012-11-24	32	2013-11-24 - 2013-11-30	31	2014-11-23 - 2014-11-29	30
2004-11-28 - 2004-12-04	100	2005-11-27 - 2005-12-03	85	2006-11-26 - 2006-12-02	35	2007-11-25 - 2007-12-01	48	2008-11-23 - 2008-11-29	28	2009-11-22 - 2009-11-28	38	2010-11-28 - 2010-12-04	52	2011-11-27 - 2011-12-03	33	2012-11-25 - 2012-12-01	39	2013-12-01 - 2013-12-07	26	2014-11-30 - 2014-12-06	27
2004-12-05 - 2004-12-11	54	2005-12-04 - 2005-12-10	94	2006-12-03 - 2006-12-09	27	2007-12-02 - 2007-12-08	34	2008-11-30 - 2008-12-06	51	2009-11-29 - 2009-12-05	41	2010-12-05 - 2010-12-11	39	2011-12-04 - 2011-12-10	35	2012-12-02 - 2012-12-08	28	2013-12-08 - 2013-12-14	26	2014-12-07 - 2014-12-13	27
2004-12-12 - 2004-12-18	43	2005-12-11 - 2005-12-17	47	2006-12-10 - 2006-12-16	33	2007-12-09 - 2007-12-15	36	2008-12-07 - 2008-12-13	35	2009-12-06 - 2009-12-12	37	2010-12-12 - 2010-12-18	30	2011-12-11 - 2011-12-17	33	2012-12-09 - 2012-12-15	29	2013-12-15 - 2013-12-21	27	2014-12-14 - 2014-12-20	24
2004-12-19 - 2004-12-25	46	2005-12-18 - 2005-12-24	37	2006-12-17 - 2006-12-23	21	2007-12-16 - 2007-12-22	41	2008-12-14 - 2008-12-20	36	2009-12-13 - 2009-12-19	26	2010-12-19 - 2010-12-25	26	2011-12-18 - 2011-12-24	18	2012-12-16 - 2012-12-22	23	2013-12-22 - 2013-12-28	22	2014-12-21 - 2014-12-27	18
2004-12-26 - 2005-01-01	30	2005-12-25 - 2005-12-31	44	2006-12-24 - 2006-12-30	32	2007-12-23 - 2007-12-29	43	2008-12-21 - 2008-12-27	25	2009-12-20 - 2009-12-26	24	2010-12-26 - 2011-01-01	31	2011-12-25 - 2011-12-31	27	2012-12-23 - 2012-12-29	26	2013-12-29 - 2014-01-04	23	2014-12-28 - 2015-01-03	22
										2009-12-27 - 2010-01-02	38					2012-12-30 - 2013-01-05	23
hiv????
aids	100
hiv symptoms	75
hiv positive	30
symptoms of hiv	25
hiv cure	20
std	15
????15
hiv ??	15
hpv	15
??	10
hiv vaccine	10
syphilis	5
charlie sheen	5
charlie sheen hiv	5
magic johnson	5
銝???hiv
hiv ??	瞈憓???	瞈憓?hiv positive	2
????+70%
hiv symptoms	0.6
symptoms of hiv	0.6
hiv cure	0.4
hpv	0.4
