# Supplementary material for: News trends and web search query of HIV/AIDS in Hong Kong
Source: PLoS One. 2017 Sep 18;12(9):e0185004. doi: 10.1371/journal.pone.0185004 (PMC5602633; doi:10.1371/journal.pone.0185004)
Supplement: S4 Table — (XLSX) [file pone.0185004.s004.xlsx]

## Sheet: News Coverage (2004-2014)
Merged Index	Type of Article	Article Topic	Place of Origin	Populations/Subpopulations concerned	Publication Date	Week Mapping (Previous Sunday)	Month-Year Mapping	Year Mapping	Article Group ID	Wisenews (Index No.)	Total No. of Wisenews Articles	Brief Description	Keep (2.1, 2.2=both, 1=either, 0=none), will keep 2.2 and 1
Index	Type	Topic	Origin	Pop	Date	From2	Month-Year	Year	GroupID	Wisenews_Index	NumArticles	Description	Keep
YD2004-341	News	HIV Surveillance	Mainland	PlHIV	2004-01-02	2003-12-28	2004-01-01	2004	301	1243	1	粵110 縣市三萬人染愛滋	2.2
YD2004-340	News	Events	HK	Celebrity	2004-01-05	2004-01-04	2004-01-01	2004	300	1234	1	車淑梅 初探愛滋家庭	1
YD2004-338	News	Events	Overseas	Homosexuals	2004-01-06	2004-01-04	2004-01-01	2004	298	1232	1	同性戀權益等同人權嗎﹖ 國際政治議題熱話	1
YD2004-339	News	HIV Science	HK	PlHIV	2004-01-06	2004-01-04	2004-01-01	2004	299	1233	1	AIDS 測試只反映6個月前情況	1
YD2004-337	News	Policy and Laws	Overseas	Homosexuals	2004-01-08	2004-01-04	2004-01-01	2004	297	1229	1	新加坡修例口交合法化	1
YD2004-336	News	Events	Overseas	Homosexuals	2004-01-09	2004-01-04	2004-01-01	2004	296	1226	1	「應享異性戀者權利」 女金剛大談同性戀問題	1
YD2004-335	News	Events	Taiwan	MSM	2004-01-14	2004-01-11	2004-01-01	2004	295	1216	1	台封殺裸男雜誌 同志申冤	1
YD2004-334	News	HIV Prevention	Overseas	PlHIV	2004-01-14	2004-01-11	2004-01-01	2004	294	1215, 1218	2	比利時主教破禁籲戴套防愛滋	1
YD2004-333	News	Social Issue	Mainland	PlHIV	2004-01-15	2004-01-11	2004-01-01	2004	293	1214	1	何大一：難以取得中國信任	1
YD2004-332	News	Events	HK	Celebrity	2004-01-18	2004-01-18	2004-01-01	2004	292	1207	1	八變封面映襯百變天后 阿梅絕唱好歌 籌愛滋基金	1
SYT2004-227	News	Events	Taiwan	MSM	2004-01-18	2004-01-18	2004-01-01	2004	178	1204-1206	3	Taiwan MSM party	2.2
SYT2004-226	News	HIV Transmission and Risk	Overseas	PLHIV	2004-01-24	2004-01-18	2004-01-01	2004	177	1196	1	HIV positive surgery doctor gave many operations to his patients	2.2
SYT2004-225	News	HIV Treatment	Overseas	PLHIV	2004-01-25	2004-01-25	2004-01-01	2004	176	1194	1	HIV Treatment method invented by 何大一	2.2
SYT2004-094	Movie	Movie	Overseas	PLHIV	2004-01-27	2004-01-25	2004-01-01	2004	72	1187	1	Oversea movie entitled "美國天使"	2.2
YD2004-327	News	Policy and Laws	Overseas	PlHIV	2004-01-29	2004-01-25	2004-01-01	2004	287	1185	1	People with infectious diseases including AIDS wil not allow to enter New York	1
YD2004-326	News	HIV Prevention	Mainland	General public	2004-02-02	2004-02-01	2004-02-01	2004	286	1178	1	湖南 歡場 100％用安全套 長沙衡陽常德重點實施	1
SYT2004-224	News	Surveys	Overseas	PLHIV	2004-02-04	2004-02-01	2004-02-01	2004	175	1175	1	Introverted HIV patients tend to die early	2.2
SYT2004-223	News	Surveillance	Overseas	PLHIV	2004-02-05	2004-02-01	2004-02-01	2004	174	1172	1	Almost half of prostitutes in St.Petersburg are HIV positive	2.2
SYT2004-205	News	Policy and Laws	Overseas	Homosexuals	2004-02-06	2004-02-01	2004-02-01	2004	163	1167,1169	2	Same sex marriage (laws), spanned several countries	2.2
YD2004-322	News	Social Issue	Mainland	PlHIV	2004-02-07	2004-02-01	2004-02-01	2004	256	1166	1	People use needles which assumed has HIV virus to extort money	1
YD2004-320	News	Events	HK	Homosexuals	2004-02-13	2004-02-08	2004-02-01	2004	281	1142	1	約四、五年前，校內有學生自發出版一本同性戀刊物，調查同學對同性戀的觀念，以及探討如肛交等同性戀性行為	1
YD2004-321	News	Events	Overseas	PlHIV	2004-02-13	2004-02-08	2004-02-01	2004	282	1143	1	MAC亦會將這個全新唇膏系列銷售得來的所有收益，捐給以該品牌名義而設立的愛滋病慈善基金	1
YD2004-319	News	Policy and Laws	Overseas	Homosexuals	2004-02-14	2004-02-08	2004-02-01	2004	280	1138	1	三藩市搶閘承認同志婚姻	2.2
YD2004-318	News	Surveys	Mainland	PlHIV	2004-02-14	2004-02-08	2004-02-01	2004	279	1137	1	愛滋病人遺二千孤兒	1
YD2004-316	News	Events	Overseas	Homosexuals	2004-02-15	2004-02-15	2004-02-01	2004	277	1132	1	Homosexual marriage affect politics in US	1
YD2004-317	News	Events	Overseas	PlHIV	2004-02-15	2004-02-15	2004-02-01	2004	278	1133	1	性愛救地球鹹濕版籌款	1
SYT2004-222	News	Surveillance	Overseas	PLHIV	2004-02-15	2004-02-15	2004-02-01	2004	173	1131	1	1% New Yorkers are HIV infected	2.2
SYT2004-221	News	HIV Treatment	Mainland China	PLHIV	2004-02-17	2004-02-15	2004-02-01	2004	172	1121-1123	3	Official went to HIV areas to promote HIV treatment and prevention	2.2
YD2004-311	News	Events	Overseas	Homosexuals	2004-02-19	2004-02-15	2004-02-01	2004	273	1117	1	G Gorilla 今次的MV 以同志愛為主題	1
SYT2004-218	News	HIV Prevention	Mainland China	General public	2004-02-19	2004-02-15	2004-02-01	2004	170	1115	1	HIV prevention in China led by 吳儀	2.2
SYT2004-220	News	HIV Treatment	Mainland China	PLHIV	2004-02-19	2004-02-15	2004-02-01	2004	172	1118	1	Official went to HIV areas to promote HIV treatment and prevention	2.2
YD2004-309	News	HIV Transmission and Risk	Overseas	PlHIV	2004-02-20	2004-02-15	2004-02-01	2004	272	1112	1	診所疏忽 260 英婦恐染愛滋	1
SYT2004-217	News	HIV Prevention	Mainland China	General public	2004-02-21	2004-02-15	2004-02-01	2004	170	1105,1107	2	HIV prevention in China led by 吳儀	2.2
SYT2004-219	News	HIV Prevention	Mainland China	PLHIV	2004-02-21	2004-02-15	2004-02-01	2004	171	1106	1	Female doctor who committed to HIV prevention	2.2
SYT2004-211	News	Policy and Laws	Overseas	Homosexuals	2004-02-21	2004-02-15	2004-02-01	2004	164	1108	1	Same sex marriage is forbidden	2.2
SYT2004-216	News	HIV Transmission and Risk	Mainland China	PLHIV	2004-02-22	2004-02-22	2004-02-01	2004	169	1103	1	70 farmers from HIV village went to Guangdong for living	2.2
YD2004-305	News	Policy and Laws	Mainland	PlHIV	2004-02-22	2004-02-22	2004-02-01	2004	266	1105	1	吳儀掛帥抗愛滋	1
SYT2004-210	News	Policy and Laws	Overseas	Homosexuals	2004-02-22	2004-02-22	2004-02-01	2004	164	1104	1	Same sex marriage is forbidden	2.2
SYT2004-209	News	Policy and Laws	Overseas	Homosexuals	2004-02-23	2004-02-22	2004-02-01	2004	164	1102	1	Same sex marriage is forbidden	2.2
SYT2004-215	Editorial	HIV Prevention	HK	General public	2004-02-24	2004-02-22	2004-02-01	2004	168	1095	1	HIV Prevention in society	2.2
YD2004-299	Movies	Others-MSM related movie	Overseas	MSM	2004-02-25	2004-02-22	2004-02-01	2004	265	1090	1	《午夜牛郎》MSM related movie	1
SYT2004-208	News	Policy and Laws	Overseas	Homosexuals	2004-02-25	2004-02-22	2004-02-01	2004	164	1085	1	Same sex marriage is forbidden	2.2
SYT2004-214	News	Surveillance	HK	PLHIV	2004-02-25	2004-02-22	2004-02-01	2004	167	1086,1088,1093	3	HIV infection decreasing 12%	2.2
YD2004-298	News	Surveys	Mainland	PlHIV	2004-02-25	2004-02-22	2004-02-01	2004	264	1087	1	Situation of AIDS effect and transimission in China	1
SYT2004-213	News	HIV testing	Taiwan	General public-tourists	2004-02-26	2004-02-22	2004-02-01	2004	166	1082	1	HIV tests are required for entering Taiwan	2.2
SYT2004-207	News	Policy and Laws	Overseas	Homosexuals	2004-02-26	2004-02-22	2004-02-01	2004	164	1083,1084	2	Same sex marriage is forbidden	2.2
YD2004-293	News	HIV Science	Overseas	PlHIV	2004-02-27	2004-02-22	2004-02-01	2004	260	1079	1	猴子體內存抗愛滋病蛋白	2.2
YD2004-291	News	Policy and Laws	Overseas	Homosexuals	2004-02-28	2004-02-22	2004-02-01	2004	258	1075	1	露絲在晨早節目《Good Morning America》中宣布結婚消息	1
YD2004-292	News	Policy and Laws	Overseas	Homosexuals	2004-02-28	2004-02-22	2004-02-01	2004	259	1076	1	總統布殊於周三建議修改憲法禁止同志結婚	2.2
YD2004-290	News	HIV Transimission or Risks	Overseas	MSM	2004-02-29	2004-02-29	2004-02-01	2004	257	1074	1	吸血殭屍派對綁着打血針	1
YD2004-288	News	HIV Transimission or Risks	Mainland	PlHIV	2004-03-01	2004-02-29	2004-03-01	2004	255	1066	1	People from one county of He'nan sales blood and infected with AIDS	1
YD2004-289	News	Social Issue	Mainland	PlHIV	2004-03-01	2004-02-29	2004-03-01	2004	256	1069	1	People use needles which assumed has HIV virus to extort money	1
SYT2004-202	News	HIV Treatment	HK	PLHIV	2004-03-09	2004-03-07	2004-03-01	2004	162	1037	1	New medicine made by "長科"	1
YD2004-285	News	Policy and Laws	Overseas	Homosexuals	2004-03-09	2004-03-07	2004-03-01	2004	252	1041	1	西雅圖承認同性婚姻地位	2.2
YD2004-284	News	HIV Education and Awareness	HK	General public	2004-03-13	2004-03-07	2004-03-01	2004	251	1028	1	指節巨細胞瘤非愛滋	1
SYT2004-201	News	Policy and Laws	Overseas	Homosexuals	2004-03-13	2004-03-07	2004-03-01	2004	161	1027	1	Same sex marriage (laws), spanned several countries	2.2
YD2004-282	News	Events	Overseas	PlHIV	2004-03-15	2004-03-14	2004-03-01	2004	249	1025	1	曼德拉畫作製成服裝 為愛滋病基金會籌款	2.2
SYT2004-199	Movie	Movie	HK	MSM	2004-03-15	2004-03-14	2004-03-01	2004	160	1024	1	Local movie entitled "蘋果"	2.2
YD2004-278	News	HIV Science	Overseas	PlHIV	2004-03-17	2004-03-14	2004-03-01	2004	242	1019	1	愛滋病者較易患心臟病	1
YD2004-280	News	HIV Transimission or Risks	Overseas	PlHIV	2004-03-17	2004-03-14	2004-03-01	2004	247	1021	1	加國千多名曾針灸病人須驗愛滋	2.2
YD2004-279	News	Social Issue	Overseas	Homosexuals	2004-03-17	2004-03-14	2004-03-01	2004	246	1020, 1022	2	美國兩名牧師因替十三對同性戀伴侶證婚，前天被當局刑事起訴	2.2
SYT2004-196	News	Social Issues	Overseas	Homosexuals	2004-03-18	2004-03-14	2004-03-01	2004	157	1018	1	First nursing home for homosexuals in Germany	2.2
YD2004-275	Movies	Others-MSM related movie	HK	MSM	2004-03-21	2004-03-21	2004-03-01	2004	243	1011	1	《大佬愛美麗》narrated the life of a gay	1
YD2004-276	News	Social Issue	HK	PlHIV	2004-03-21	2004-03-21	2004-03-01	2004	244	1012-1013	1	患上愛滋病而輕生	1
YD2004-274	News	HIV Science	Overseas	PlHIV	2004-03-23	2004-03-21	2004-03-01	2004	242	1003	1	愛滋病者較易患心臟病	1
YD2004-273	News	Statistics	Overseas	PlHIV	2004-03-24	2004-03-21	2004-03-01	2004	241	999	1	人口增長速度已明顯放緩，這與歐美婦女減少生育和愈來愈多人死於愛滋病有關	1
YD2004-270	News	HIV Treatment	Overseas	PlHIV	2004-03-25	2004-03-21	2004-03-01	2004	241	995	1	籲富裕國支持抗愛滋病	1
SYT2004-194	News	HIV Treatment	HK	PLHIV	2004-03-25	2004-03-21	2004-03-01	2004	155	995996	2	Celebrity(何大一) claiming HIV treatment support in developing countries	2.2
YD2004-272	News	Policy and Laws	Overseas	Homosexuals	2004-03-25	2004-03-21	2004-03-01	2004	240	997	1	俄勒岡州本頓郡禁止結婚	1
SYT2004-195	News	Surveillance	Others-Asia	PLHIV	2004-03-25	2004-03-21	2004-03-01	2004	156	998	1	500 thousand HIV patients died in Asia	1
YD2004-269	News	Social Issue	Overseas	Homosexuals	2004-03-26	2004-03-21	2004-03-01	2004	240	993	1	反歧視攣直一律禁婚	1
SYT2004-193	News	HIV testing	Overseas	PLHIV	2004-03-28	2004-03-28	2004-03-01	2004	154	988	1	HIV testing in mouth spending 20 minutes	2.2
SYT2004-192	News	Policy and Laws	Overseas	Homosexuals	2004-03-29	2004-03-28	2004-03-01	2004	153	987	1	Same sex marriage (laws), spanned several countries	2.2
YD2004-266	News	Events	Mainland	PlHIV	2004-04-01	2004-03-28	2004-04-01	2004	199	974	1	自稱患有愛滋病女賊持「愛滋針」行劫	1
SYT2004-191	News	Social Issues	Overseas	Homosexuals	2004-04-01	2004-03-28	2004-04-01	2004	152	973	1	First homosexuals TV channel	2.2
YD2004-263	News	Events	Overseas	MSM	2004-04-02	2004-03-28	2004-04-01	2004	235	968	1	been gay	1
YD2004-264	News	Events	Overseas	Celebrity	2004-04-02	2004-03-28	2004-04-01	2004	236	970	1	米高提議義唱籌款for AIDS patients	1
SYT2004-190	News	HIV testing	HK	General public-pregnant women	2004-04-05	2004-04-04	2004-04-01	2004	151	963	1	HIV testing before pregnant women delivering	2.2
YD2004-261	News	HIV Treatment	Overseas	PlHIV	2004-04-05	2004-04-04	2004-04-01	2004	233	962	1	愛滋孤兒當白老鼠 英藥廠用三月大嬰兒試藥	1
SYT2004-189	News	HIV Prevention	Mainland China	PLHIV	2004-04-06	2004-04-04	2004-04-01	2004	150	959	1	Demonstration area of AIDS prevention and control	2.2
SYT2004-188	News	Policy and Laws	Overseas	Homosexuals	2004-04-07	2004-04-04	2004-04-01	2004	149	957	1	Same sex marriage (laws), spanned several countries	1
YD2004-259	News	HIV Surveillance	Overseas	PlHIV	2004-04-08	2004-04-04	2004-04-01	2004	231	954955	1	港人尋歡熱點澳門的愛滋病個案有上升趨勢	2.2
YD2004-258	News	Social Issue	Mainland	PlHIV	2004-04-13	2004-04-11	2004-04-01	2004	239	941, 942	2	不堪 歧視愛滋漢斬殺8鄰	1
SYT2004-185	News	Celebrities	Overseas	Celebrities	2004-04-14	2004-04-11	2004-04-01	2004	146	930	1	Celebrity(曼德拉) promoting HIV prevention	1
YD2004-255	News	HIV Science	HK	PlHIV	2004-04-14	2004-04-11	2004-04-01	2004	236	931	1	HIV damage inmune system	2.2
YD2004-257	News	Social Issue	Overseas	PlHIV	2004-04-14	2004-04-11	2004-04-01	2004	238	933938	2	恐怖分子計劃以帶有愛滋病毒的炸彈發動襲擊	1
YD2004-256	News	Surveys	Mainland	PlHIV	2004-04-14	2004-04-11	2004-04-01	2004	237	932	1	There are 640 thusand people infected with infectious diseases including AIDS	1
YD2004-254	News	Events	Overseas	Celebrity	2004-04-16	2004-04-11	2004-04-01	2004	235	930	1	46664抗愛滋	1
YD2004-253	News	Events	Overseas	MSM	2004-04-17	2004-04-11	2004-04-01	2004	234	926	1	願為侵犯兒童案作控方證人 同志男模爆與米高積遜性史	1
SYT2004-184	News	HIV testing	Overseas	General public-blue movie actresses	2004-04-17	2004-04-11	2004-04-01	2004	143	924925	2	HIV tests for blue movie actresses	2.2
SYT2004-183	News	HIV testing	Overseas	General public-blue movie actresses	2004-04-18	2004-04-18	2004-04-01	2004	143	920	1	HIV tests for blue movie actresses	2.2
SYT2004-182	News	HIV Treatment	Mainland China	PLHIV	2004-04-22	2004-04-18	2004-04-01	2004	106	905906	2	HIV patients died after trying new medicine	2.2
YD2004-249	News	Events	Mainland	PlHIV	2004-04-23	2004-04-18	2004-04-01	2004	231	901	1	兩名愛滋病戀人結婚	1
YD2004-248	News	HIV Surveillance	Overseas	PlHIV	2004-04-24	2004-04-18	2004-04-01	2004	230	900	1	馬交嗰邊愛滋病數字有上升嘅趨勢	1
YD2004-247	News	Events	Overseas	Celebrity	2004-04-28	2004-04-25	2004-04-01	2004	220	889890	2	Cheng Long donate ten house to AIDS patients	1
SYT2004-180	News	HIV Transmission and Risk	Taiwan	PLHIV	2004-04-29	2004-04-25	2004-04-01	2004	145	885886	2	2 Chinese female are HIV positive who stealed into Taiwan	2.2
SYT2004-179	News	Surveillance	Mainland China	PLHIV	2004-04-30	2004-04-25	2004-04-01	2004	144	881	1	50000 HIV infected persons in Hunan	2.2
SYT2004-178	News	HIV testing	Overseas	General public-blue movie actresses	2004-05-02	2004-05-02	2004-05-01	2004	143	878	1	HIV tests for blue movie actresses	2.2
YD2004-243	News	HIV Transimission or Risks	Overseas	PlHIV	2004-05-04	2004-05-02	2004-05-01	2004	226	871	1	家庭暴力問題會導致愛滋病加速散播	2.2
YD2004-242	News	Events	Overseas	Celebrity	2004-05-06	2004-05-02	2004-05-01	2004	220	868	1	Cheng Long donate ten house to AIDS patients	1
SYT2004-176	News	Celebrities	HK	Celebrities	2004-05-07	2004-05-02	2004-05-01	2004	124	867	1	Celebrities' donation (黃耀明)	1
YD2004-241	News	Events	HK	Celebrity	2004-05-07	2004-05-02	2004-05-01	2004	225	867	1	Kiehl's The Blue Party donate money to AIDS patients	1
SYT2004-175	News	HIV Treatment	HK	PLHIV	2004-05-08	2004-05-02	2004-05-01	2004	141	866	1	New medicine to cure HIV	1
YD2004-240	News	Policy and Laws	Overseas	PlHIV	2004-05-09	2004-05-09	2004-05-01	2004	224	860	1	Seven infectious disease including AIDS related people are banned to enter US	1
SYT2004-174	News	Surveillance	Mainland China	PLHIV	2004-05-09	2004-05-09	2004-05-01	2004	140	859	1	HIV surveillance results in Mainland China	1
SYT2004-173	News	HIV Prevention	Mainland China	General public	2004-05-10	2004-05-09	2004-05-01	2004	139	858	1	The State Council promoting HIV prevention	2.2
YD2004-237	News	HIV Surveillance	Mainland	PlHIV	2004-05-10	2004-05-09	2004-05-01	2004	221	857	1	吳儀：大陸84萬人染愛滋	2.2
YD2004-239	News	HIV Transimission or Risks	Mainland	PlHIV	2004-05-10	2004-05-09	2004-05-01	2004	223	859	1	新疆目前已成為散播愛滋病的新熱點	1
YD2004-236	News	Events	Overseas	Celebrity	2004-05-11	2004-05-09	2004-05-01	2004	220	853856	2	Cheng Long donate ten house to AIDS patients	1
YD2004-235	News	Events	Overseas	Celebrity	2004-05-14	2004-05-09	2004-05-01	2004	219	845	1	Increase donation to AIDS treatment	2.2
SYT2004-170	News	HIV Treatment	Overseas	PLHIV	2004-05-15	2004-05-09	2004-05-01	2004	137	842	1	New method to cure HIV	2.2
YD2004-233	News	HIV Education and Awareness	Mainland	PlHIV	2004-05-16	2004-05-16	2004-05-01	2004	217	834	1	內地首部描述河南愛滋村的紀錄片《好死不如賴活着》，奪得第六十三屆美國廣播電視文化成就獎（	2.2
SYT2004-181	News	HIV Treatment	Mainland China	PLHIV	2004-05-16	2004-05-16	2004-05-01	2004	106	836	1	HIV patients died after trying new medicine	1
YD2004-231	News	Policy and Laws	Overseas	Homosexuals	2004-05-17	2004-05-16	2004-05-01	2004	215	832	1	麻省同性戀者蜂擁結婚	2.2
YD2004-232	News	Social Issue	Mainland	PlHIV	2004-05-17	2004-05-16	2004-05-01	2004	216	833	1	地壇醫院遭愛滋家屬索償	1
SYT2004-167	News	Policy and Laws	Overseas	Homosexuals	2004-05-18	2004-05-16	2004-05-01	2004	134	831	1	Same sex marriage (laws), spanned several countries	2.2
SYT2004-166	News	Surveillance	Overseas	PLHIV	2004-05-18	2004-05-16	2004-05-01	2004	133	829	1	HIV surveillance results in Singapore	2.2
SYT2004-165	News	HIV Prevention	Overseas	Celebrities	2004-05-19	2004-05-16	2004-05-01	2004	132	825-827	3	Celebrity(Bono) promoting HIV prevention in Africa	1
SYT2004-164	News	Surveillance	Mainland China	PLHIV	2004-05-22	2004-05-16	2004-05-01	2004	131	818	1	HIV increasing by 24% in Shenzhen	1
YD2004-228	News	HIV Surveillance	Mainland	PlHIV	2004-05-23	2004-05-23	2004-05-01	2004	213	818	1	深圳愛滋病年增24%	1
YD2004-227	News	Events	Overseas	PlHIV	2004-05-26	2004-05-23	2004-05-01	2004	212	808	1	Man with AIDS was told that he has infected with HIV for many years	1
SYT2004-162	Editorial	HIV Prevention	HK	General public	2004-05-26	2004-05-23	2004-05-01	2004	129	806	1	Emergency of HIV prevention	1
YD2004-226	News	HIV Surveillance	HK	PlHIV	2004-05-26	2004-05-23	2004-05-01	2004	211	807	1	The first season newly AIDS patients are 62	1
SYT2004-163	News	HIV Transmission and Risk	HK	MSM	2004-05-26	2004-05-23	2004-05-01	2004	130	807	1	Increasing HIV infection in MSM	1
SYT2004-161	News	HIV Transmission and Risk	Taiwan	PLHIV	2004-05-26	2004-05-23	2004-05-01	2004	128	805	1	Taiwan boy transmitting HIV via donating blood	2.2
YD2004-225	News	Surveys	Overseas	PlHIV	2004-05-26	2004-05-23	2004-05-01	2004	210	806	1	Situation of AIDS effect and transimission	1
SYT2004-160	News	HIV Sciene	Overseas	General public	2004-05-27	2004-05-23	2004-05-01	2004	127	803	1	Salivary bacteria can prevent HIV transmission	2.2
SYT2004-159	News	HIV Treatment	Overseas	PLHIV	2004-05-27	2004-05-23	2004-05-01	2004	126	799800	2	New medicine curing HIV	1
YD2004-222	News	Events	HK	General public	2004-05-29	2004-05-23	2004-05-01	2004	207	794795	2	仁醫棄高薪 助印尼治愛滋	2.2
YD2004-221	News	Events	HK	Celebrity	2004-05-30	2004-05-30	2004-05-01	2004	206	790792	2	黃耀明獻唱 酬金助愛滋	2.2
SYT2004-156	News	HIV Transmission and Risk	Taiwan	General public-whoremasters	2004-05-30	2004-05-30	2004-05-01	2004	123	787788	2	Chinese HIV infected prostitute transmiting HIV in Taiwan	2.2
YD2004-219	News	HIV Treatment	HK	PlHIV	2004-05-31	2004-05-30	2004-05-01	2004	204	785	1	Stowaways came to HK in order to treat their AIDS in prisons	1
YD2004-217	News	HIV Treatment	Mainland	PlHIV	2004-05-31	2004-05-30	2004-05-01	2004	205	780, 783	2	深圳辦全國首家愛滋門診日	2.2
YD2004-218	News	HIV Treatment	Mainland	PlHIV	2004-05-31	2004-05-30	2004-05-01	2004	206	781	1	醫生揭愛滋村黑幕獲獎	2.2
YD2004-216	News	Social Issue	HK	PlHIV	2004-06-01	2004-05-30	2004-06-01	2004	204	776	1	Stowaways came to HK in order to treat their AIDS in prisons	1
YD2004-215	News	Events	HK	MSM	2004-06-02	2004-05-30	2004-06-01	2004	203	774	1	曾作肛交怕患腸癌	1
YD2004-214	News	HIV Transimission or Risks	HK	PlHIV	2004-06-02	2004-05-30	2004-06-01	2004	202	770	1	HIV risks	1
YD2004-213	News	Events	Overseas	MSM	2004-06-04	2004-05-30	2004-06-01	2004	201	768	1	Gay ask other country for pilitical protection	1
YD2004-212	News	Events	Overseas	Celebrity	2004-06-06	2004-06-06	2004-06-01	2004	200	764765	2	「Project Angel Food」donate money to AIDS patients and disabilities	1
YD2004-210	News	Others-MSM related movie	Overseas	PlHIV	2004-06-06	2004-06-06	2004-06-01	2004	198	762	1	「童話故事」narrated a story about a gay with AIDS	2.2
YD2004-211	News	Social Issue	Mainland	PlHIV	2004-06-06	2004-06-06	2004-06-01	2004	199	763	1	自稱患有愛滋病女賊持「愛滋針」行劫	1
YD2004-208	News	Events	Overseas	MSM	2004-06-14	2004-06-13	2004-06-01	2004	196	745747	2	查理斯同性戀醜聞	1
SYT2004-152	News	HIV Prevention	Overseas	Others-volunteers	2004-06-14	2004-06-13	2004-06-01	2004	119	746	1	British prince becoming AIDS volunteer in Africa	2.2
YD2004-207	News	Events	Mainland	MSM	2004-06-18	2004-06-13	2004-06-01	2004	195	734	1	A rural labourer was forced to have sex with gays in Chengdu, China	1
SYT2004-151	News	HIV Treatment	Overseas	PLHIV	2004-06-18	2004-06-13	2004-06-01	2004	118	732733	2	11-year old boy claiming he can cure HIV	2.2
SYT2004-150	News	HIV Transmission and Risk	HK	General public	2004-06-21	2004-06-20	2004-06-01	2004	117	730	1	HIV transmission probabilities are different between male and female	1
YD2004-205	News	HIV Transmission and Risk	HK	General public	2004-06-23	2004-06-20	2004-06-01	2004	183	730	1	The difference of possibility between men and women infected ith HIV	1
YD2004-204	News	Events	Overseas	Homosexuals	2004-06-24	2004-06-20	2004-06-01	2004	182	718, 720	2	新 潮 《聖經》鼓勵做愛 刪保羅罵同性戀章節	1
YD2004-203	News	Policy and Laws	HK	MSM	2004-06-25	2004-06-20	2004-06-01	2004	181	716	1	Gays may want to ask government change the law and allow them have sex at age of 16 rather than 21.	1
SYT2004-149	News	Celebrities	HK	Celebrities	2004-06-26	2004-06-20	2004-06-01	2004	115	714	1	Celebrities' donation on HIV charity concert	1
YD2004-202	News	Events	HK	MSM	2004-06-30	2004-06-27	2004-06-01	2004	180	708	1	MSM	1
SYT2004-148	News	Surveillance	Mainland China	PLHIV	2004-06-30	2004-06-27	2004-06-01	2004	116	705706	2	China HIV surveillance results	2.2
YD2004-200	News	HIV Prevention	HK	PlHIV	2004-07-03	2004-06-27	2004-07-01	2004	178	698	1	The safty of sex without condem	1
SYT2004-147	News	Celebrities	HK	Celebrities	2004-07-04	2004-07-04	2004-07-01	2004	115	695	1	Celebrities' donation on HIV charity concert	1
YD2004-199	News	Events	Mainland	PlHIV	2004-07-05	2004-07-04	2004-07-01	2004	177	692	1	Find the key factors that lead to the high prevalence of AIDS in China	1
YD2004-197	News	Events	Mainland	PlHIV	2004-07-07	2004-07-04	2004-07-01	2004	175	684	1	國感染愛滋病毒的人數可能在六年內增至一千萬	1
SYT2004-146	News	HIV Treatment	Overseas	Others-volunteers	2004-07-07	2004-07-04	2004-07-01	2004	114	683	1	Belgian doctor taking care of thousands of HIV patients in Thailand	2.2
YD2004-198	News	Surveys	Overseas	PlHIV	2004-07-07	2004-07-04	2004-07-01	2004	176	685	1	聯合國周二發表報告，指全球現有3,800萬愛滋病毒感染者，其中500萬人是去年新增的	1
YD2004-195	News	Events	Overseas	Celebrity	2004-07-08	2004-07-04	2004-07-01	2004	173	681	1	Ashley Judd care about patients with AIDS in Cambodia	1
YD2004-194	News	Events	Overseas	MSM	2004-07-09	2004-07-04	2004-07-01	2004	172	680	1	意時裝設計師Valentino公開同志戀情	1
YD2004-193	News	Events	Overseas	Celebrity	2004-07-09	2004-07-04	2004-07-01	2004	171	676	1	李察基爾 印度關懷愛滋	2.2
YD2004-192	News	Others-MSM related movie	HK	MSM	2004-07-10	2004-07-04	2004-07-01	2004	170	674, 675	2	MSM related movie 《死亡寫真》	1
SYT2004-139	News	Events	Overseas	PLHIV	2004-07-11	2004-07-11	2004-07-01	2004	107	673	1	AIDS international conference	1
YD2004-191	News	HIV Education and Awareness	Mainland	PlHIV	2004-07-11	2004-07-11	2004-07-01	2004	169	673	1	溫總 撰文 「愛滋問題繫國家興亡」	1
SYT2004-144	News	HIV Transmission and Risk	Taiwan	General public-prisoners	2004-07-11	2004-07-11	2004-07-01	2004	112	672	1	23 prisoners are HIV positive at the same time	2.2
SYT2004-138	News	Events	Overseas	PLHIV	2004-07-12	2004-07-11	2004-07-01	2004	107	664665667	3	AIDS international conference	2.2
YD2004-188	News	HIV Education and Awareness	Mainland	General public	2004-07-12	2004-07-11	2004-07-01	2004	177	663	1	中國向農村宣傳防治愛滋	2.2
SYT2004-137	News	Events	Overseas	PLHIV	2004-07-13	2004-07-11	2004-07-01	2004	107	660	1	AIDS international conference	2.2
YD2004-185	News	Events	HK	PlHIV	2004-07-14	2004-07-11	2004-07-01	2004	174	654, 655	2	AIDS man committed suicide	1
YD2004-184	News	HIV Science	Overseas	General public	2004-07-14	2004-07-11	2004-07-01	2004	173	653	1	檸檬汁沖洗陰道預防愛滋病	2.2
SYT2004-140	News	HIV Treatment	HK	Others-volunteers	2004-07-14	2004-07-11	2004-07-01	2004	15	652	1	HK doctor volunteer providing HIV treatment outside of HK	2.2
SYT2004-142	News	HIV Vaccine	Overseas	General public	2004-07-14	2004-07-11	2004-07-01	2004	109	656	1	New research plan about HIV vaccine	2.2
SYT2004-136	News	Events	Overseas	PLHIV	2004-07-15	2004-07-11	2004-07-01	2004	107	644	1	AIDS international conference	2.2
YD2004-182	News	HIV Prevention	Mainland	General public	2004-07-15	2004-07-11	2004-07-01	2004	171	648	1	Distrbutimg condems in Beijing	1
YD2004-180	News	Events	Overseas	Celebrity	2004-07-16	2004-07-11	2004-07-01	2004	167	642	1	布殊提禁同性婚姻遭否決	1
SYT2004-135	News	Events	Overseas	PLHIV	2004-07-16	2004-07-11	2004-07-01	2004	107	641	1	AIDS international conference	2.2
YD2004-176	News	Events	Overseas	General public	2004-07-17	2004-07-11	2004-07-01	2004	167	635, 636	2	Activities in 愛滋病大會係泰國曼谷舉行	2.2
SYT2004-134	Movie	Movie	Overseas	PLHIV	2004-07-17	2004-07-11	2004-07-01	2004	72	638,639	2	Oversea movie entitled "美國天使"	2.2
YD2004-177	News	Policy and Laws	Overseas	PlHIV	2004-07-17	2004-07-11	2004-07-01	2004	168	636	1	美國伊州准愛滋患者互贈器官	2.2
SYT2004-131	News	HIV Treatment	Mainland China	PLHIV	2004-07-18	2004-07-18	2004-07-01	2004	106	631	1	HIV patients died after trying new medicine	2.2
SYT2004-130	News	Surveillance	Taiwan	PLHIV	2004-07-19	2004-07-18	2004-07-01	2004	100	627,628	2	Taiwan HIV surveillance results	2.2
YD2004-173	News	HIV Transimission or Risks	Overseas	PlHIV	2004-07-20	2004-07-18	2004-07-01	2004	164	625	1	美愛滋病者被控蓄意播毒	1
SYT2004-129	News	HIV Treatment	HK	PLHIV	2004-07-20	2004-07-18	2004-07-01	2004	105	624	1	Anti-HIV medicine made by 長科	2.2
YD2004-171	News	HIV Transimission or Risks	Taiwan	PlHIV	2004-07-23	2004-07-18	2004-07-01	2004	162	619	1	警破淫窟拘愛滋妓	1
YD2004-170	News	Others- MSM related MV	HK	MSM	2004-07-23	2004-07-18	2004-07-01	2004	161	618	1	組合Sky日前拍攝新歌《情投意合》的MV,內容以同性戀作為題材	1
SYT2004-128	News	Policy and Laws	Overseas	Homosexuals	2004-07-23	2004-07-18	2004-07-01	2004	104	620	1	First same sex divorce case	1
SYT2004-127	Movie	Movie	Taiwan	MSM	2004-07-25	2004-07-25	2004-07-01	2004	95	615	1	Taiwan movie entitled "17歲的天空"	1
YD2004-169	News	HIV Education and Awareness	Mainland	General public	2004-07-26	2004-07-25	2004-07-01	2004	160	613	1	AIDS project educates entertainment people	2.2
SYT2004-124	News	HIV Prevention	HK	General public-Truck drivers	2004-07-27	2004-07-25	2004-07-01	2004	101	607	1	AIDS concern promoting HIV prevention	2.2
SYT2004-125	Others-drama	Others-drama	HK	MSM	2004-07-27	2004-07-25	2004-07-01	2004	102	610	1	Local drama entitled "攣到爆"	1
SYT2004-122	News	HIV Prevention	Overseas	General public	2004-07-28	2004-07-25	2004-07-01	2004	99	603	1	Kiehl's promoting HIV prevention	2.2
SYT2004-123	News	Surveillance	Taiwan	PLHIV	2004-07-28	2004-07-25	2004-07-01	2004	100	604	1	Taiwan HIV surveillance results	2.2
SYT2004-121	News	Policy and Laws	Overseas	Homosexuals	2004-07-29	2004-07-25	2004-07-01	2004	98	601	1	Same sex marriage is invalid in Frence	2.2
YD2004-164	News	Social Issue	Overseas	PlHIV	2004-07-30	2004-07-25	2004-07-01	2004	155	599	1	印度被指漠視愛滋病兒童	2.2
YD2004-163	News	Social Issue	Overseas	Homosexuals	2004-08-01	2004-08-01	2004-08-01	2004	154	595	1	《洛杉磯時報》辱同志	2.2
SYT2004-118	Movie	Movie	Taiwan	MSM	2004-08-04	2004-08-01	2004-08-01	2004	95	590	1	Taiwan movie entitled "17歲的天空"	2.2
SYT2004-117	News	Policy and Laws	Overseas	Homosexuals	2004-08-05	2004-08-01	2004-08-01	2004	94	587	1	Australia president against same sex marriage	2.2
SYT2004-116	News	Surveillance	HK	PLHIV	2004-08-05	2004-08-01	2004-08-01	2004	93	586	1	Local HIV surveillance results	2.2
YD2004-158	News	Events	Mainland	PlHIV	2004-08-06	2004-08-01	2004-08-01	2004	149	580, 581	2	內地首個為愛滋孤兒而設的「陽光下，我們一起成長」夏令營遭遇歧视	1
YD2004-159	News	Surveys	Mainland	General public	2004-08-06	2004-08-01	2004-08-01	2004	150	582	1	不安全注射年殺39萬人,some people even infected with HIV	1
YD2004-157	News	Events	Overseas	Homosexuals	2004-08-11	2004-08-08	2004-08-01	2004	148	571	1	「Nation 04」的亞洲區最大型同志派對举行	2.2
YD2004-156	News	Social Issue	Mainland	PlHIV	2004-08-11	2004-08-08	2004-08-01	2004	147	570	1	愛滋孤兒上京找吳儀	1
YD2004-155	News	Others- TV series about HIV	HK	PlHIV	2004-08-12	2004-08-08	2004-08-01	2004	146	565	1	《不棄今生》, 一部全景式反映中國內地愛滋病防治現狀的電視連續劇	1
YD2004-154	News	Social Issue	Mainland	PlHIV	2004-08-13	2004-08-08	2004-08-01	2004	145	562	1	牌占士邦羅渣摩亞譴責歧視愛滋兒	1
YD2004-152	News	Events	Overseas	MSM	2004-08-14	2004-08-08	2004-08-01	2004	143	557, 558	2	美州長自認同志辭職	1
SYT2004-114	News	Policy and Laws	Overseas	Homosexuals	2004-08-14	2004-08-08	2004-08-01	2004	91	560561	2	Same sex marriage (laws), spanned several countries	2.2
YD2004-151	News	HIV Science	Overseas	PlHIV	2004-08-17	2004-08-15	2004-08-01	2004	142	552	1	新化學物可抗反轉錄病毒	1
YD2004-150	News	HIV Science	Overseas	PlHIV	2004-08-19	2004-08-15	2004-08-01	2004	141	546	1	降膽固醇藥抗愛滋病毒	2.2
YD2004-149	News	Policy and Laws	HK	Homosexuals	2004-08-19	2004-08-15	2004-08-01	2004	140	545	1	The cummunity of humosexuals ask right from government	1
YD2004-147	News	Events	Taiwan	MSM	2004-08-20	2004-08-15	2004-08-01	2004	138	539	1	台男教授師生同性戀	1
YD2004-146	News	HIV Prevention	Mainland	General public	2004-08-20	2004-08-15	2004-08-01	2004	137	537	1	湖北高校設安全套售賣機 to prevent AIDS	1
SYT2004-112	News	Surveillance	Overseas	PLHIV	2004-08-20	2004-08-15	2004-08-01	2004	89	540	1	One-fourth soldiers are HIV positive in South Africa	2.2
SYT2004-111	News	Policy and Laws	Mainland China	PLHIV	2004-08-22	2004-08-22	2004-08-01	2004	88	530	1	HIV infected patients can marry in Jiangsu	2.2
SYT2004-110	News	HIV Transmission and Risk	HK	General public	2004-08-23	2004-08-22	2004-08-01	2004	87	525	1	Eating placenta may lead HIV infection	2.2
YD2004-143	News	Events	Overseas	PlHIV	2004-08-25	2004-08-22	2004-08-01	2004	134	520	1	美擬強制陽痿藥加警告字樣, to prevent HIV	1
SYT2004-109	News	Events	Overseas	MSM	2004-08-25	2004-08-22	2004-08-01	2004	86	518	1	MSM parade in Philippines	2.2
SYT2004-108	News	HIV Treatment	HK	PLHIV	2004-08-25	2004-08-22	2004-08-01	2004	85	517	1	CUHK doctor promoting HIV treatment	2.2
SYT2004-107	News	Policy and Laws	Overseas	Homosexuals	2004-08-26	2004-08-22	2004-08-01	2004	84	513	1	US deputy president didn't against same sex marriage	2.2
YD2004-139	News	Events	HK	General public	2004-08-27	2004-08-22	2004-08-01	2004	130	509	1	提供給予愛滋病病毒感染者和病患者的服務, 招募义工	1
SYT2004-106	News	Events	Overseas	PLHIV	2004-08-28	2004-08-22	2004-08-01	2004	83	508	1	HIV infected patients parade in Brazil	2.2
YD2004-137	News	Others-MSM related movie	Overseas	MSM	2004-08-29	2004-08-29	2004-08-01	2004	128	504	1	MSM related movie <Queer As Folk>	1
YD2004-136	News	Policy and Laws	Overseas	MSM	2004-08-31	2004-08-29	2004-08-01	2004	122	499	1	侍應涉與14歲童肛交	1
YD2004-135	News	HIV Education and Awareness	HK	General public	2004-09-01	2004-08-29	2004-09-01	2004	127	491	1	踏單車宣傳愛滋閩漢來港	2.2
SYT2004-104	News	Surveillance	HK	PLHIV	2004-09-01	2004-08-29	2004-09-01	2004	81	489,490,497	3	Local HIV surveillance results	2.2
YD2004-133	News	Social Issue	Mainland	PlHIV	2004-09-02	2004-08-29	2004-09-01	2004	125	487	1	愛滋病拖慢中國經濟	2.2
SYT2004-102	Movie	Movie	Overseas	PLHIV	2004-09-06	2004-09-05	2004-09-01	2004	79	478	1	AIDS related oversea movie made by British prince	2.2
YD2004-131	News	Policy and Laws	Overseas	MSM	2004-09-07	2004-09-05	2004-09-01	2004	123	475	1	侍應涉與14歲童肛交	1
SYT2004-101	News	Surveys	Mainland China	PLHIV	2004-09-07	2004-09-05	2004-09-01	2004	77	474	1	90% HIV infected patients have blood sale experience in Henan	2.2
SYT2004-100	News	HIV Vaccine	Mainland China	General public	2004-09-08	2004-09-05	2004-09-01	2004	78	472	1	New HIV Vaccine will be tested in China	1
YD2004-129	News	HIV Testing	Mainland	General public	2004-09-09	2004-09-05	2004-09-01	2004	121	472	1	在中國展開預防愛滋病疫苗的臨床測試	1
SYT2004-099	News	Surveys	Mainland China	PLHIV	2004-09-11	2004-09-05	2004-09-01	2004	77	458460	2	90% HIV infected patients have blood sale experience in Henan	2.2
YD2004-127	News	HIV Surveillance	Mainland	PlHIV	2004-09-14	2004-09-12	2004-09-01	2004	119	455	1	吳儀：中國愛滋病日趨嚴重	2.2
SYT2004-097	News	Policy and Laws	Overseas	Homosexuals	2004-09-16	2004-09-12	2004-09-01	2004	75	451	1	Same sex divorce (laws), spanned several countries	1
YD2004-125	News	Events	Overseas	Celebrity	2004-09-18	2004-09-12	2004-09-01	2004	117	448	1	亨利王子訪非洲愛滋病重災區	1
YD2004-126	News	HIV Education and Awareness	Overseas	Celebrity	2004-09-18	2004-09-12	2004-09-01	2004	118	449	1	韋哥曼德拉 教小孩防愛滋	2.2
YD2004-124	News	Events	Taiwan	MSM	2004-09-19	2004-09-19	2004-09-01	2004	116	446	1	MSM related《愛是唯一》MV	1
YD2004-123	News	Events	HK	PlHIV	2004-09-20	2004-09-19	2004-09-01	2004	115	439	1	廿年紀念愛滋英雄難忘	2.2
SYT2004-093	Movie	Movie	Overseas	PLHIV	2004-09-21	2004-09-19	2004-09-01	2004	72	436,438	2	Oversea movie entitled "美國天使"	2.2
SYT2004-092	News	HIV Prevention	Mainland China	General public-prostitutes	2004-09-22	2004-09-19	2004-09-01	2004	71	429	1	HIV prevention among prostitutes	2.2
YD2004-121	News	HIV Education and Awareness	Mainland	General public	2004-09-23	2004-09-19	2004-09-01	2004	113	429	1	廣西一名妓女多年來義務向同行傳授防愛滋的知識	1
YD2004-120	News	HIV Treatment	Mainland	PlHIV	2004-09-24	2004-09-19	2004-09-01	2004	112	424	1	生產用作改善愛滋病患者症狀的中成藥「唐草片」	1
YD2004-119	News	HIV Transimission or Risks	Overseas	PlHIV	2004-09-25	2004-09-19	2004-09-01	2004	111	420	1	亞太地區愈來愈富裕之際，亦衍生吸毒及濫用藥物問題，導致愛滋病毒進一步蔓延	1
YD2004-118	News	HIV Transimission or Risks	Overseas	PlHIV	2004-09-26	2004-09-26	2004-09-01	2004	110	419	1	美國公民愛滋病帶菌者蓄意传染艾滋	1
SYT2004-089	News	HIV Prevention	Mainland China	General public-drug takers	2004-09-28	2004-09-26	2004-09-01	2004	68	407	1	Helping druggers prevent HIV	2.2
YD2004-116	News	HIV Science	Mainland	General public	2004-09-28	2004-09-26	2004-09-01	2004	108	408, 409	2	中國人或有抗愛滋病基因	2.2
SYT2004-091	News	Surveys	HK	General public	2004-09-28	2004-09-26	2004-09-01	2004	70	410	1	Survey plan to see public attitude to homosexuality	2.2
YD2004-114	News	Events	Overseas	Celebrity	2004-10-02	2004-09-26	2004-10-01	2004	106	402	1	女星莎朗史東出席愛滋病基金嘅慈善拍賣	1
SYT2004-088	News	Surveys	Mainland China	General public-officials	2004-10-03	2004-10-03	2004-10-01	2004	67	398	1	Chinese officials's HIV awareness is poor	2.2
YD2004-112	News	Events	HK	MSM	2004-10-05	2004-10-03	2004-10-01	2004	104	394	1	Hong Suk Chun declare himself as a gay	1
YD2004-111	News	Events	HK	MSM	2004-10-06	2004-10-03	2004-10-01	2004	103	391	1	Article abourt gay	1
SYT2004-087	News	HIV Vaccine	Overseas	General Public	2004-10-06	2004-10-03	2004-10-01	2004	66	390	1	New HIV vaccine in Russia	2.2
SYT2004-085	News	Events	Mainland China	MSM	2004-10-08	2004-10-03	2004-10-01	2004	64	385	1	Large MSM conference in Shanghai	1
SYT2004-086	News	Policy and Laws	Overseas	MSM	2004-10-08	2004-10-03	2004-10-01	2004	65	387	1	Same sex marriage (laws), spanned several countries	1
YD2004-109	News	Events	Mainland	Homosexuals	2004-10-10	2004-10-10	2004-10-01	2004	101	385	1	內地首次大規模的同性戀者會議	1
YD2004-108	Movies	Others-MSM related movie	HK	MSM	2004-10-11	2004-10-10	2004-10-01	2004	100	375	1	电影《攣到爆》重演 買票要快	1
YD2004-106	News	Events	Mainland	General public	2004-10-12	2004-10-10	2004-10-01	2004	98	365	1	安南肯定華滅貧防愛滋貢獻	1
YD2004-107	News	Events	HK	PlHIV	2004-10-12	2004-10-10	2004-10-01	2004	99	369	1	Article describe the life of AIDS people	1
YD2004-105	News	Events	Overseas	Celebrity	2004-10-13	2004-10-10	2004-10-01	2004	97	364	1	英國殿堂級男歌手艾頓莊（Elton John）前日出席在美國加州舉行的一年一度慈善網球賽，為其愛滋病慈善基金籌款	2.2
YD2004-103	News	Events	HK	General public	2004-10-14	2004-10-10	2004-10-01	2004	95	360	1	零點貳 — 愛滋病在香港二十年難忘人物選舉」的計劃，正在接受提名	1
YD2004-101	News	HIV Science	Overseas	Homosexuals	2004-10-14	2004-10-10	2004-10-01	2004	94	358	1	研究亦指出，同性戀可能和母親賦予的基因有關，所以同性戀很有可能是遺傳的	1
YD2004-102	News	HIV Transmission and Risk	Overseas	PlHIV	2004-10-14	2004-10-10	2004-10-01	2004	92	359	1	德國獨腳漢席曼涉嫌蓄意將愛滋病毒傳給泰國妓女	1
SYT2004-083	News	Surveys	Mainland China	MSM	2004-10-14	2004-10-10	2004-10-01	2004	62	361	1	Survey about MSM in Guangdong	2.2
YD2004-099	News	Events	HK	Celebrity	2004-10-17	2004-10-17	2004-10-01	2004	93	343	1	「中國愛滋病防治行動」籌款舉行的《愛之關懷愛之夜》	2.2
YD2004-100	News	Events	Overseas	Celebrity	2004-10-17	2004-10-17	2004-10-01	2004	88	345	1	約克公爵夫人莎拉為佢個愛滋病慈善基金籌款嗰陣	2.2
YD2004-098	News	Events	HK	Celebrity	2004-10-18	2004-10-17	2004-10-01	2004	93	341, 342	2	「中國愛滋病防治行動」籌款舉行的《愛之關懷愛之夜》	1
YD2004-095	News	HIV Testing	HK	MSM	2004-10-20	2004-10-17	2004-10-01	2004	90	332	1	「關懷愛滋」為男同志提供愛滋病抗體測試服務	2.2
YD2004-097	News	Social Issue	Overseas	PlHIV	2004-10-20	2004-10-17	2004-10-01	2004	92	335	1	德國獨腳漢席曼涉嫌蓄意將愛滋病毒傳給泰國妓女	1
SYT2004-080	News	Surveys	HK	MSM	2004-10-20	2004-10-17	2004-10-01	2004	60	333,334,336	3	First large-scale survey about MSM sexual behaviour	2.2
SYT2004-076	News	Celebrities	Overseas	Celebrities	2004-10-21	2004-10-17	2004-10-01	2004	56	327	1	Celebrities donation（Kate Winslet）	1
YD2004-092	News	Events	Overseas	Celebrity	2004-10-21	2004-10-17	2004-10-01	2004	87	326	1	U2主音Bono同醫院嘅研究人員討論愛滋病疫苗嘅問題	1
YD2004-093	News	Events	Overseas	Celebrity	2004-10-21	2004-10-17	2004-10-01	2004	88	327	1	約克公爵夫人莎拉為佢個愛滋病慈善基金籌款嗰陣	1
YD2004-090	News	HIV Prevention	HK	Celebrity	2004-10-21	2004-10-17	2004-10-01	2004	85	324	1	鄧萃雯分享如何灌輸正確的性教育及預防愛滋病的訊息給年輕人	1
SYT2004-075	News	HIV Science	HK	PLHIV	2004-10-21	2004-10-17	2004-10-01	2004	55	322	1	Method to help HIV patients deliver healthy babies	2.2
YD2004-094	News	Novels	Overseas	Homosexuals	2004-10-21	2004-10-17	2004-10-01	2004	89	331	1	同志小說獲英國布克小說獎	2.2
YD2004-089	News	Others-MSM related movie	Overseas	MSM	2004-10-21	2004-10-17	2004-10-01	2004	84	323	1	MSM related movie 《MAISON.DO.HIMIKO》	1
YD2004-091	News	Others-MSM related movie	Overseas	MSM	2004-10-21	2004-10-17	2004-10-01	2004	86	325	1	MSM related movie《同志安老院》	1
SYT2004-077	News	Surveillance	HK	PLHIV	2004-10-21	2004-10-17	2004-10-01	2004	57	330	1	2300 persons are infected HIV	1
SYT2004-074	News	Statistics	Mainland China	PLHIV	2004-10-26	2004-10-24	2004-10-01	2004	54	311	1	Forecast 10 million HIV infected patients in 2010 in China	2.2
YD2004-085	News	HIV Transmission and Risk	Mainland	PlHIV	2004-10-29	2004-10-24	2004-10-01	2004	80	301	1	愛滋針筒勒索	1
YD2004-086	News	Policy and Laws	Overseas	Homosexuals	2004-10-29	2004-10-24	2004-10-01	2004	81	302	1	布殊支持修改憲法禁止同性戀者結婚，以便制止個別州份批准同性戀婚姻	1
SYT2004-073	News	Surveillance	Mainland China	PLHIV	2004-10-31	2004-10-31	2004-10-01	2004	53	297	1	HIV surveillance results in Shenzhen	2.2
YD2004-083	News	Events	Overseas	Celebrity	2004-11-01	2004-10-31	2004-11-01	2004	78	295	1	女星珍妮花露芙赫韋特,出席愛滋病兒童基金於加州舉行的慈善晚會	1
YD2004-082	News	Events	HK	MSM	2004-11-03	2004-10-31	2004-11-01	2004	77	289	1	丈夫是同性戀者	1
YD2004-081	News	HIV Transimission or Risks	Mainland	PlHIV	2004-11-09	2004-11-07	2004-11-01	2004	76	261	1	中國部份地區母嬰傳播愛滋病比例由千分一上升到千分六	2.2
SYT2004-072	News	Policy and Laws	Taiwan	General public-tourists	2004-11-09	2004-11-07	2004-11-01	2004	52	262	1	Taiwan premarital HIV tests for tourists	1
YD2004-080	News	HIV Transimission or Risks	Overseas	PlHIV	2004-11-10	2004-11-07	2004-11-01	2004	75	259	1	A man transmitted HIV to others after releasing from prison	1
YD2004-079	News	Events	Overseas	Celebrity	2004-11-11	2004-11-07	2004-11-01	2004	74	253, 254	2	畢彼特夫婦冇婚變同赴埃塞俄比亞關注愛滋	2.2
YD2004-077	News	HIV Education and Awareness	HK	General public	2004-11-12	2004-11-07	2004-11-01	2004	72	247	1	志願組織「關懷愛滋」到砵蘭街進行外展服務	1
SYT2004-069	News	Surveillance	Overseas	PLHIV	2004-11-12	2004-11-07	2004-11-01	2004	49	248	1	HIV surveillance results in Singapore	2.2
YD2004-076	News	HIV Education and Awareness	Overseas	PlHIV	2004-11-15	2004-11-14	2004-11-01	2004	71	242	1	TV series named《天涯俠醫》, 讲述艾滋病治疗	1
SYT2004-068	News	Surveillance	Mainland China	PLHIV	2004-11-17	2004-11-14	2004-11-01	2004	48	234	1	1600 HIV infected patients in Xi'an	2.2
YD2004-073	News	HIV Science	Overseas	General public	2004-11-18	2004-11-14	2004-11-01	2004	68	228	1	人體基因突變影響愛滋病	2.2
YD2004-074	News	Others-TV shows related to AIDS	HK	PlHIV	2004-11-18	2004-11-14	2004-11-01	2004	69	230	1	TV show named Aids,Answers & Breakthroughs	2.2
SYT2004-065	News	Celebrities	HK	Celebrities	2004-11-19	2004-11-14	2004-11-01	2004	45	224	1	Donation activity	1
YD2004-072	News	Events	HK	Celebrity	2004-11-22	2004-11-21	2004-11-01	2004	67	226	1	周汶錡：認識愛滋冇有怕	1
SYT2004-064	News	HIV Prevention	Mainland China	General public	2004-11-22	2004-11-21	2004-11-01	2004	44	210	1	China should provide strong HIV prevention measures	1
SYT2004-062	News	Celebrities	HK	Celebrities	2004-11-23	2004-11-21	2004-11-01	2004	42	206,207,209	3	Celebrities as AIDS concern ambassadors	2.2
YD2004-070	News	Events	HK	Celebrity	2004-11-23	2004-11-21	2004-11-01	2004	65	199	1	FCUK 愛心籌款夜	2.2
SYT2004-063	News	HIV Prevention	Mainland China	General public	2004-11-23	2004-11-21	2004-11-01	2004	43	208	1	Condoms distribution in Guangdong	1
YD2004-069	Movies	Others-MSM related movie	HK	MSM	2004-11-24	2004-11-21	2004-11-01	2004	64	198	1	《GAY的疑惑》探討校園同性戀	2.2
SYT2004-059	News	Surveillance	Overseas	PLHIV	2004-11-24	2004-11-21	2004-11-01	2004	53	197	1	3 million PLHIV died this year	2.2
SYT2004-058	News	HIV Prevention	Mainland China	General public-university students	2004-11-25	2004-11-21	2004-11-01	2004	52	192	1	Condoms distribution in universities	1
YD2004-067	News	HIV Education and Awareness	HK	PlHIV	2004-11-26	2004-11-21	2004-11-01	2004	62	186	1	忘了•忘不了 翡翠台, 关于艾滋病的电视节目	1
SYT2004-057	News	Events	Overseas	Celebrities	2004-11-27	2004-11-21	2004-11-01	2004	51	182,183	2	Donation concert in South Africa	1
SYT2004-056	News	Surveillance	Mainland China	PLHIV	2004-11-28	2004-11-28	2004-11-01	2004	50	179	1	HIV surveillance results in Shenzhen	2.2
YD2004-065	News	HIV Education and Awareness	HK	General public	2004-11-29	2004-11-28	2004-11-01	2004	60	173	1	TV shows named The Hunt for an AIDS Vaccine	2.2
SYT2004-054	News	HIV Prevention	Overseas	General public	2004-11-29	2004-11-28	2004-11-01	2004	48	172	1	HIV prevention in India	2.2
SYT2004-053	News	Policy and Laws	Overseas	General public-couples before marrying	2004-11-29	2004-11-28	2004-11-01	2004	23	171	1	Singapore premarital HIV tests	1
YD2004-063	News	Policy and Laws	Overseas	General public	2004-11-29	2004-11-28	2004-11-01	2004	58	171	1	Pregnant women may be required to detect HIV by government	1
SYT2004-052	News	Celebrities	HK	Celebrities	2004-11-30	2004-11-28	2004-11-01	2004	47	167	1	Japanese celebrities promoting HIV prevention	1
YD2004-058	News	HIV Education and Awareness	HK	PlHIV	2004-11-30	2004-11-28	2004-11-01	2004	53	164	1	A song wrote about the life of people with HIV	1
SYT2004-049	Editorial	HIV Prevention	HK	Others-volunteer organization	2004-11-30	2004-11-28	2004-11-01	2004	44	162,163	2	Criticism about government's less supervision to HIV high risk group	1
YD2004-056	News	HIV Prevention	HK	General public	2004-11-30	2004-11-28	2004-11-01	2004	51	162	1	愛滋高危群 政府懶監察	1
YD2004-057	News	HIV Prevention	HK	PlHIV	2004-11-30	2004-11-28	2004-11-01	2004	52	163	1	預防愛滋病需跨境進行	1
YD2004-060	News	HIV Prevention	Overseas	General public	2004-11-30	2004-11-28	2004-11-01	2004	55	166	1	研究殺菌劑預防愛滋病	2.2
SYT2004-050	Movie	Movie	HK	PLHIV	2004-11-30	2004-11-28	2004-11-01	2004	45	164	1	Local movie entitled "天長地久"	1
YD2004-061	Movies	Others-MSM related movie	HK	Homosexuals	2004-11-30	2004-11-28	2004-11-01	2004	56	168	1	《地上的彩虹.1》	1
YD2004-059	News	Surveys	Mainland	PlHIV	2004-11-30	2004-11-28	2004-11-01	2004	54	165	1	內地潛伏90%愛滋病帶菌者	1
SYT2004-048	News	Surveys	Mainland China	PLHIV	2004-11-30	2004-11-28	2004-11-01	2004	43	161,165	2	90% HIV infected patients lacking supervision	2.2
SYT2004-047	News	Celebrities	HK	Celebrities	2004-12-01	2004-11-28	2004-12-01	2004	42	152,157,160	3	Celebrities as AIDS concern ambassadors	1
SYT2004-040	Editorial	Events	Overseas	PLHIV	2004-12-01	2004-11-28	2004-12-01	2004	37	142,158	2	World AIDS Day	1
YD2004-051	News	Events	Overseas	PlHIV	2004-12-01	2004-11-28	2004-12-01	2004	46	148	1	The life situation of women and children that left behind by the husbands and fathers past away with AIDS	1
YD2004-054	News	Events	HK	PlHIV	2004-12-01	2004-11-28	2004-12-01	2004	49	152, 157, 160	3	Qianhua care about the children that left by parents with AIDS	1
YD2004-048	News	Events	Mainland	PlHIV	2004-12-01	2004-11-28	2004-12-01	2004	44	144, 153	2	Jintao Hu visited patients who infected with HIV	2.2
YD2004-050	News	Events	Overseas	Celebrity	2004-12-01	2004-11-28	2004-12-01	2004	41	147	1	Aijia Zhang went to India and help people with AIDS there	2.2
YD2004-046	News	HIV Education and Awareness	HK	PlHIV	2004-12-01	2004-11-28	2004-12-01	2004	42	142	1	Special article about AIDS and emphasized that women are very vulnernable to HIV	1
SYT2004-046	Editorial	HIV Prevention	HK	Others-volunteer organization	2004-12-01	2004-11-28	2004-12-01	2004	41	151	1	Introduction of volunteer organization "宣明會"	1
SYT2004-042	Editorial	HIV Transmission and Risk	HK	General public-whoremasters	2004-12-01	2004-11-28	2004-12-01	2004	25	146154	2	HIV Transmission via no condom	2.2
YD2004-053	News	HIV Treatment	HK	PlHIV	2004-12-01	2004-11-28	2004-12-01	2004	48	151	1	針對愛滋病的救助及預防	1
YD2004-047	News	Social Issue	Mainland	PlHIV	2004-12-01	2004-11-28	2004-12-01	2004	43	143, 145	2	愛滋病致孤兒童的情況	1
YD2004-052	News	Surveillance	HK	PLHIV	2004-12-01	2004-11-28	2004-12-01	2004	47	149, 150	2	吸毒染愛滋人士續增	2.2
YD2004-036	News	Events	HK	General public	2004-12-02	2004-11-28	2004-12-01	2004	32	120127	2	reporting people that have contributed to treatment and prevention of AIDS	2.2
YD2004-038	News	Events	HK	General public	2004-12-02	2004-11-28	2004-12-01	2004	34	122	1	渣打銀行特別設計「Living with HIV 關心愛滋行動」流動教育資訊中心	2.2
YD2004-042	News	Events	HK	General public	2004-12-02	2004-11-28	2004-12-01	2004	38	129, 133	2	Reporting activities in World AIDS Day	2.2
YD2004-044	News	Events	HK	Celebrity	2004-12-02	2004-11-28	2004-12-01	2004	40	131-132, 138	3	鄭融、許志安及2R前晚到蘭桂坊出席《關懷愛滋2004年世界愛滋日籌款盛事》	2.2
YD2004-045	News	Events	Overseas	Celebrity	2004-12-02	2004-11-28	2004-12-01	2004	41	133	1	Aijia Zhang went to India and help people with AIDS there	2.2
SYT2004-031	Editorial	HIV Education and Awareness	Mainland China	Others-government	2004-12-02	2004-11-28	2004-12-01	2004	28	121	1	Government's HIV prevention awareness improved	2.2
SYT2004-037	News	HIV Transmission and Risk	HK	General public-prostitutes	2004-12-02	2004-11-28	2004-12-01	2004	34	130	1	HIV transmiting in prostitutes	2.2
SYT2004-035	News	Surveillance	Mainland China	PLHIV	2004-12-02	2004-11-28	2004-12-01	2004	32	125,126	2	HIV transmiting in MSM	2.2
SYT2004-033	News	Surveys	Overseas	General public	2004-12-02	2004-11-28	2004-12-01	2004	30	123	1	Only 10% people concern HIV in Southeast Asia	2.2
YD2004-040	News	Surveys	Overseas	General public	2004-12-02	2004-11-28	2004-12-01	2004	36	124	1	US failed in prevention of AIDS	2.2
YD2004-035	News	HIV Education and Awareness	HK	Celebrity	2004-12-03	2004-11-28	2004-12-01	2004	31	115, 118	2	Cuiwen Deng teached others to prevent AIDS	1
YD2004-034	News	HIV Transimission or Risks	Mainland	PlHIV	2004-12-03	2004-11-28	2004-12-01	2004	33	114	1	內地首次起訴非法採血官員, 导致感染艾滋病	1
YD2004-033	News	HIV Education and Awareness	Overseas	General public	2004-12-04	2004-11-28	2004-12-01	2004	32	107	1	US educates people with wrong information about sex and AIDS	1
YD2004-032	News	HIV Prevention	HK	Celebrity	2004-12-04	2004-11-28	2004-12-01	2004	31	105	1	Cuiwen Deng teached women protect themselves from infection with HIV	1
SYT2004-029	News	TV Documentary	HK	Celebrities	2004-12-04	2004-11-28	2004-12-01	2004	26	105	1	HKTV documentary《愛之無盡大地》 Launching ceremony	1
SYT2004-028	Editorial	HIV Transmission and Risk	HK	General public-whoremasters	2004-12-06	2004-12-05	2004-12-01	2004	25	101	1	HIV Transmission via no condom	2.2
SYT2004-027	News	Others-MSM baby	Overseas	General public-pregnant women	2004-12-06	2004-12-05	2004-12-01	2004	24	100	1	Diet pills causing MSM baby	1
SYT2004-026	Movie	Movie	HK	MSM	2004-12-07	2004-12-05	2004-12-01	2004	13	98	1	Local movie entitled "傳道．同志"	2.2
SYT2004-024	News	Events	HK	Celebrities	2004-12-08	2004-12-05	2004-12-01	2004	22	94	1	Celebrities donating to HIV concerned charity organization	2.2
SYT2004-021	Editorial	HIV Prevention	HK	Others-volunteers	2004-12-08	2004-12-05	2004-12-01	2004	19	90	1	Charity organization promoting HIV Prevention	1
YD2004-027	News	HIV science	HK	PlHIV	2004-12-08	2004-12-05	2004-12-01	2004	27	91-92	2	港大破解愛滋基因 可助製藥	2.2
SYT2004-023	News	HIV Transmission and Risk	Mainland China	General public	2004-12-08	2004-12-05	2004-12-01	2004	21	93	1	HIV Transmission via poor quality condoms	1
SYT2004-025	News	Policy and Laws	Overseas	General public-couples before marrying	2004-12-08	2004-12-05	2004-12-01	2004	23	97	1	Singapore premarital HIV tests	2.2
SYT2004-019	News	HIV Transmission and Risk	Overseas	General public-children	2004-12-10	2004-12-05	2004-12-01	2004	17	78,82,85	3	AIDS becoming major threat factor to children in the world	2.2
SYT2004-020	News	Policy and Laws	Overseas	General public	2004-12-10	2004-12-05	2004-12-01	2004	18	79	1	Insulting homosexuality can be sentenced to imprisonment in France	2.2
YD2004-026	News	Social Issue	Overseas	Celebrity	2004-12-10	2004-12-05	2004-12-01	2004	26	80	1	羅國總理為證明非同性戀挑戰記者	1
SYT2004-018	News	Celebrities	HK	Celebrities	2004-12-11	2004-12-05	2004-12-01	2004	16	73	1	Singers promoting HIV prevention in concert	1
YD2004-023	News	Events	Overseas	MSM	2004-12-11	2004-12-05	2004-12-01	2004	23	77	1	Rumor of a celebrity that he is a gay	1
YD2004-022	News	HIV Prevention	HK	Celebrity	2004-12-11	2004-12-05	2004-12-01	2004	22	73	1	Yaoming Huang appeal people to prevent AIDS	1
YD2004-021	News	Events	Overseas	MSM	2004-12-13	2004-12-12	2004-12-01	2004	21	71	1	艾頓莊聖誕前結婚	1
SYT2004-016	News	HIV Treatment	HK	Others-volunteers	2004-12-13	2004-12-12	2004-12-01	2004	15	70	1	HK doctor volunteer providing HIV treatment outside of HK	1
SYT2004-017	News	Policy and Laws	Overseas	MSM	2004-12-13	2004-12-12	2004-12-01	2004	3	71	1	Same sex marriage (laws), spanned several countries	1
YD2004-020	News	HIV Science	Overseas	PlHIV	2004-12-14	2004-12-12	2004-12-01	2004	20	69	1	發現抗愛滋病病毒基因	2.2
SYT2004-014	Movie	Movie	HK	MSM	2004-12-16	2004-12-12	2004-12-01	2004	13	63	1	Local movie entitled "傳道．同志"	2.2
SYT2004-012	News	Celebrities	Overseas	Celebrities	2004-12-17	2004-12-12	2004-12-01	2004	11	52	1	Advertisement for HIV Prevention	1
YD2004-016	News	Events	Overseas	MSM	2004-12-17	2004-12-12	2004-12-01	2004	16	51	1	A celebrity delared himself as gay and has been detected with HIV positive	1
YD2004-017	News	Events	Overseas	Celebrity	2004-12-17	2004-12-12	2004-12-01	2004	17	52	1	澳洲女歌手Dannii Minogue help prevent AIDS	1
SYT2004-013	News	HIV testing	Overseas	General public-pregnant women	2004-12-17	2004-12-12	2004-12-01	2004	12	53	1	Some pregnant women refusing HIV test	2.2
YD2004-015	News	HIV Treatment	Taiwan	General public	2004-12-17	2004-12-12	2004-12-01	2004	15	50	1	台聲稱發明預防及治療愛滋藥物	2.2
SYT2004-010	News	Policy and Laws	Overseas	PLHIV	2004-12-18	2004-12-12	2004-12-01	2004	9	46	1	A HIV infected pregnant woman died after medicine experiment	1
YD2004-014	News	Surveys	Overseas	General public	2004-12-18	2004-12-12	2004-12-01	2004	14	45	1	Lacking basic knowledge of AIDS in Singapore	2.2
YD2004-012	News	Events	Overseas	MSM	2004-12-20	2004-12-19	2004-12-01	2004	12	39, 42	2	Scholar claimed that Lincoln is gay	1
YD2004-013	News	Events	HK	General public	2004-12-20	2004-12-19	2004-12-01	2004	13	40, 41	2	三傑出女性獲愛滋病義工獎	2.2
YD2004-011	News	HIV Science	Taiwan	PlHIV	2004-12-21	2004-12-19	2004-12-01	2004	11	38	1	Research results that can be used to observe AIDS	1
SYT2004-006	News	social issues	HK	MSM	2004-12-22	2004-12-19	2004-12-01	2004	5	32	1	MSM in toilet and theater	2.2
SYT2004-007	News	Surveys	Mainland China	General public-Massage girls	2004-12-22	2004-12-19	2004-12-01	2004	6	33,35,37	3	24% massage girls are HIV positive	1
YD2004-009	News	Events	Overseas	MSM	2004-12-25	2004-12-19	2004-12-01	2004	9	26	1	红军队员在同性恋吧开party庆祝圣诞	1
YD2004-007	News	Events	Overseas	Celebrity	2004-12-26	2004-12-26	2004-12-01	2004	7	20	1	艾頓莊結婚等合法	1
SYT2004-005	News	HIV Transmission and Risk	Overseas	General Public	2004-12-26	2004-12-26	2004-12-01	2004	4	21	1	Alcohol increasing HIV transmission risk	2.2
SYT2004-004	News	Policy and Laws	Overseas	MSM	2004-12-26	2004-12-26	2004-12-01	2004	3	20	1	Same sex marriage (laws), spanned several countries	1
SYT2004-003	News	Policy and Laws	HK	Homosexuals	2004-12-27	2004-12-26	2004-12-01	2004	2	19	1	Polls plan next year to see if it's necessary to modify legislation	2.2
SYT2004-002	News	Policy and Laws	HK	MSM	2004-12-28	2004-12-26	2004-12-01	2004	1	15	1	Gay challenging the lower limit age for MSM in law	1
YD2004-005	News	Events	Overseas	MSM	2004-12-29	2004-12-26	2004-12-01	2004	5	14	1	大澤一治「包」男星醜聞	1
SYT2004-001	News	Policy and Laws	HK	MSM	2004-12-29	2004-12-26	2004-12-01	2004	1	12	1	Gay challenging the lower limit age for MSM in law	1
YD2004-003	News	Events	HK	PlHIV	2004-12-30	2004-12-26	2004-12-01	2004	3	6,7	2	羈留愛滋病人 不准服藥 入境處被轟漠視治病權利	1
YD2004-004	News	Events	Overseas	Homosexuals	2004-12-30	2004-12-26	2004-12-01	2004	4	9,11	2	人權先鋒女作家桑塔格病逝, 她論述同性戀美學的《營地筆記，奠定她的主要新作家的地位	1
YD2004-002	News	Policy and Laws	HK	MSM	2004-12-31	2004-12-26	2004-12-01	2004	2	4, 12, 15	3	Gay challenged the law that require gay reach 21 year old to have sex with each other.	1
YD2004-001	News	Social Issue	Mainland	General public	2004-12-31	2004-12-26	2004-12-01	2004	1	2, 3	2	Syringe needle with HIV in the Guangzhou theater scared people	1
YD2005-334	News	Social Issue	HK	Homosexuals	2005-01-01	2004-12-26	2005-01-01	2005	273	1398, 1401	1	04年10大歧視新聞公布	1
LPK2005-252	News	Social Issues	HK	Homosexuals	2005-01-03	2005-01-02	2005-01-01	2005	240	1394	1	Homosexuality organization blamed The society of truth and light's speech about homosexuals is misleading	2.2
YD2005-332	News	Events	Overseas	PLHIV	2005-01-09	2005-01-09	2005-01-01	2005	271	1386	1	文迪拉長子死於愛滋病	1
YD2005-331	News	HIV Transmission and Risks	Overseas	PLHIV	2005-01-10	2005-01-09	2005-01-01	2005	270	1383	1	Bus driver first person jailed for HIV crime in France	1
LPK2005-251	News	Social Issues	Overseas	PLHIV	2005-01-10	2005-01-09	2005-01-01	2005	239	1382	1	Large amount of AIDS orphans in Cambodia needed help	2.2
YD2005-329	News	Others-MSM related movies	Overseas	MSM	2005-01-11	2005-01-09	2005-01-01	2005	268	1381	1	Far From Heaven Star Movies msm related movie	1
LPK2005-250	News	HIV Science	Overseas	General public	2005-01-12	2005-01-09	2005-01-01	2005	238	1375	1	Rhesus macaque has a special gene can protect them not to be infected by HIV	2.2
LPK2005-249	News	HIV Science	Overseas	General public	2005-01-14	2005-01-09	2005-01-01	2005	237	1368	1	Human has a gene can stop HIV from entering our body	1
YD2005-325	News	Policy and Law	Taiwan	PLHIV	2005-01-15	2005-01-09	2005-01-01	2005	265	1366	1	港人在台灣逗留逾三個月，須接受愛滋病檢查	1
YD2005-326	News	HIV Science	Overseas	PLHIV	2005-01-15	2005-01-09	2005-01-01	2005	266	1368	1	人類有阻斷愛滋病毒基因	1
YD2005-324	News	Social Issue	Overseas	MSM	2005-01-16	2005-01-16	2005-01-01	2005	264	1364	1	美另類化武同性戀彈	1
YD2005-323	News	Others-article about MSM	HK	MSM	2005-01-17	2005-01-16	2005-01-01	2005	263	1360	1	anal sex	1
YD2005-319	News	Events	HK	MSM	2005-01-19	2005-01-16	2005-01-01	2005	249	1347, 1348	2	女生沉溺男同志漫畫	1
YD2005-320	News	Events	Mainland	PLHIV	2005-01-19	2005-01-16	2005-01-01	2005	261	1349	1	吉林昨日為5對「愛滋新人」舉行婚禮	1
LPK2005-247	News	Policy and Laws	Mainland China	PLHIV	2005-01-19	2005-01-16	2005-01-01	2005	235	1346	1	AIDS orphans and AIDS kids in Guangdong can study free of charge	2.2
LPK2005-248	News	Policy and Laws	HK	MSM	2005-01-19	2005-01-16	2005-01-01	2005	236	1351, 1355	2	a 20-year-old MSM thinked that age of consent of MSM involved in discrimination	2.2
YD2005-316	News	Events	Overseas	MSM	2005-01-20	2005-01-16	2005-01-01	2005	258	1343	1	哥連法奴獲兩提名 because of the msm related movies	1
YD2005-315	News	Events	Overseas	Celebrity	2005-01-22	2005-01-16	2005-01-01	2005	257	1341	1	Ashley Judd探訪肯雅	1
LPK2005-246	News	HIV testing	HK	General public	2005-01-23	2005-01-23	2005-01-01	2005	234	1340	1	Hong Kong government decided to introduce quick test kit of AIDS from Canadian company	2.2
YD2005-313	News	Events	HK	MSM	2005-01-24	2005-01-23	2005-01-01	2005	256	1338	1	男同志圈網上極力吹捧 medicine named Poppers	1
LPK2005-244	News	Social Issues	Mainland China	PLHIV	2005-01-25	2005-01-23	2005-01-01	2005	232	1332	1	Hospital inHeilongjiang province refuse to cure AIDS patients	2.2
LPK2005-245	News	HIV testing	HK	General public	2005-01-25	2005-01-23	2005-01-01	2005	233	1333, 1335	2	Quick test kit of AIDS released	2.2
YD2005-310	News	HIV Treatment	HK	PLHIV	2005-01-26	2005-01-23	2005-01-01	2005	253	1330	1	四類貴藥病人自付 including AIDS medicine	1
YD2005-309	News	Magazine	Overseas	MSM	2005-01-27	2005-01-23	2005-01-01	2005	252	1327	1	《Gay Times》msm related magazine	1
YD2005-308	Movies	Others-MSM realted movies	HK	MSM	2005-01-29	2005-01-23	2005-01-01	2005	223	1317	1	《GAY的疑惑》MSM related movie	1
LPK2005-243	News	HIV Surveillance	Mainland China	PLHIV	2005-01-30	2005-01-30	2005-01-01	2005	231	1316	1	Number of AIDS cases increased by 10 times in 5 years in Guangdong	1
YD2005-307	Movies	Others-MSM realted movies	Overseas	MSM	2005-01-30	2005-01-30	2005-01-01	2005	251	1313	1	《亞歷山大帝》was assumed to be msm related movie	1
YD2005-305	News	Events	HK	MSM	2005-01-31	2005-01-30	2005-01-01	2005	249	1311	1	女生沉溺男同志漫畫	1
YD2005-306	News	Events	HK	MSM	2005-01-31	2005-01-30	2005-01-01	2005	250	1312	1	李逸朗酒吧遭男同志兜搭	1
LPK2005-242	News	Others	Overseas	PLHIV	2005-01-31	2005-01-30	2005-01-01	2005	230	1309, 1310	2	A British governor declared as an AIDS patient	2.2
YD2005-303	News	Events	Overseas	Homosexuals	2005-02-01	2005-01-30	2005-02-01	2005	247	1308	1	性取向與多種基因有關愛滋病研究基金於紐約舉行的慈善晚會	1
LPK2005-241	News	Policy and Laws	Taiwan	PLHIV	2005-02-04	2005-01-30	2005-02-01	2005	229	1303	1	A law in taiwan is blamed as it discriminate mainland spouse	2.2
YD2005-300	News	Events	Overseas	MSM	2005-02-07	2005-02-06	2005-02-01	2005	244	1300	1	Helsinki marketing itself as gay-friendly place	1
YD2005-301	News	Policy and Law	Overseas	Homosexuals	2005-02-07	2005-02-06	2005-02-01	2005	245	1302	1	Canada's minority government has unveiled draft legislation to permit gay marriage	1
YD2005-298	News	HIV Science	Overseas	General Public	2005-02-08	2005-02-06	2005-02-01	2005	243	1297	1	New infectious disease related with MSM	1
YD2005-299	News	Events	Overseas	MSM	2005-02-08	2005-02-06	2005-02-01	2005	201	1298	1	Lincoln was gay?	1
YD2005-297	News	Events	Mainland	PLHIV	2005-02-09	2005-02-06	2005-02-01	2005	242	1294, 1295	1	溫總探望河南愛滋村	2.2
LPK2005-238	News	HIV Vaccine	Overseas	General public	2005-02-10	2005-02-06	2005-02-01	2005	227	1289	1	HIV vaccine may presence within 10 years	2.2
YD2005-296	News	Events	Mainland	PLHIV	2005-02-10	2005-02-06	2005-02-01	2005	242	1292	1	溫總探望河南愛滋村	2.2
YD2005-294	News	HIV Surveillance	Overseas	PLHIV	2005-02-13	2005-02-13	2005-02-01	2005	240	1281	1	紐約爆新愛滋病毒	2.2
YD2005-293	News	HIV Science	Overseas	General Public	2005-02-15	2005-02-13	2005-02-01	2005	239	1272	1	變種愛滋追殺癌細胞	1
LPK2005-237	News	Policy and Laws	Overseas	General public	2005-02-16	2005-02-13	2005-02-01	2005	226	1270	1	People stay in UK for longer time required to have HIV testing	2.2
LPK2005-233	News	HIV Prevention	Mainland China	PLHIV	2005-02-17	2005-02-13	2005-02-01	2005	222	1264	1	Shanxi province separate AIDS patients with other citizens	1
LPK2005-236	News	HIV Prevention	Mainland China	PLHIV	2005-02-17	2005-02-13	2005-02-01	2005	225	1267	1	Setting up AIDS seperation zone in Shanxi is controversial	2.2
YD2005-289	News	Events	Mainland	PLHIV	2005-02-17	2005-02-13	2005-02-01	2005	235	1265	1	內地東北有「愛滋新人」表演	2.2
YD2005-290	News	Surveys	HK	Homosexuals	2005-02-17	2005-02-13	2005-02-01	2005	236	1266	1	委任同性戀意見調查諮詢小組	2.2
YD2005-291	News	Events	Overseas	Celebrity	2005-02-17	2005-02-13	2005-02-01	2005	237	1269	1	艾頓莊的愛滋病基金籌集善款	2.2
YD2005-287	News	Events	Overseas	MSM	2005-02-19	2005-02-13	2005-02-01	2005	232	1261	1	Dolce & Gabbana相戀19年宣布分手	1
LPK2005-232	News	Sex-related crime	Mainland China	MSM	2005-02-19	2005-02-13	2005-02-01	2005	221	1260	1	MSM commits sex-related crime	2.2
LPK2005-231	News	Policy and Laws	Mainland China	Others	2005-02-20	2005-02-20	2005-02-01	2005	220	1256	1	People who want to work in places of public entertainment need to have HIV testing	2.2
YD2005-283	News	Events	Overseas	MSM	2005-02-21	2005-02-20	2005-02-01	2005	228	1252	1	白宮假記者是男妓	1
YD2005-284	News	Events	Overseas	Celebrity	2005-02-21	2005-02-20	2005-02-01	2005	229	1253, 1254	2	英國哈里王子（圖），本周會成立一個慈善基金，協助應付非洲的貧窮和愛滋病問題	1
LPK2005-230	News	Policy and Laws	Overseas	Homosexuals	2005-02-22	2005-02-20	2005-02-01	2005	219	1249	1	British homosexual soldiers can enjoy rights of soldiers with normal sexual orientation	2.2
YD2005-281	News	Events	HK	General Public	2005-02-23	2005-02-20	2005-02-01	2005	226	1247	1	李瑞山過檔 埋首研究愛滋	1
LPK2005-229	News	Surveillance	HK	PLHIV	2005-02-23	2005-02-20	2005-02-01	2005	218	1244, 1248	2	Number of AIDS cases increased drastically	2.2
YD2005-279	News	Events	Mainland	Celebrity	2005-02-25	2005-02-20	2005-02-01	2005	224	1237	1	克林頓訪愛滋病人	2.2
YD2005-278	News	Events	Mainland	Celebrity	2005-02-27	2005-02-27	2005-02-01	2005	223	1231	1	讚揚中國預防愛滋工作	2.2
LPK2005-226	News	HIV Education and Awareness	Mainland China	General public	2005-02-28	2005-02-27	2005-02-01	2005	215	1221-1223	3	HIV/AIDS education included in secondary education in mainland	2.2
YD2005-276	News	Events	Mainland	Celebrity	2005-03-02	2005-02-27	2005-03-01	2005	215	1213	1	Yanhua Yang and Xiaodong Chen came to shanxi and visited AIDS orphans	1
YD2005-275	News	HIV Transmission or Risk	Mainland	PLHIV	2005-03-02	2005-02-27	2005-03-01	2005	221	1212	1	共用針筒啪針 戒毒所43人染愛滋	2.2
YD2005-274	News	Events	HK	MSM	2005-03-03	2005-02-27	2005-03-01	2005	220	1208, 1211	2	胡兵為蒲基吧狡辯	1
LPK2005-223	News	Social Issues	Overseas	Homosexuals	2005-03-03	2005-02-27	2005-03-01	2005	212	1205	1	Homosexuals are being discriminated by airlines	2.2
YD2005-273	News	Events	Overseas	Celebrity	2005-03-03	2005-02-27	2005-03-01	2005	219	1206, 1209	1	Jamie Foxx care about AIDS	2.2
YD2005-271	News	Events	Mainland	General Public	2005-03-04	2005-02-27	2005-03-01	2005	217	1202	1	虧空200萬做慈善	1
LPK2005-152	News	Social Issues	Overseas	PLHIV	2005-03-05	2005-02-27	2005-03-01	2005	144	1203	1	Indian company helped AIDS patients to find their companion	1
LPK2005-222	News	HIV Transmission or Risk	HK	General public	2005-03-05	2005-02-27	2005-03-01	2005	211	1201	1	People spreading AIDS in HK being arrested	2.2
YD2005-269	News	Events	Mainland	Celebrity	2005-03-06	2005-03-06	2005-03-01	2005	215	1199, 1200	2	Yanhua Yang and Xiaodong Chen came to shanxi and visited AIDS orphans	2.2
YD2005-268	News	Events	Overseas	Homosexuals	2005-03-08	2005-03-06	2005-03-01	2005	231	1194	1	澳洲悉尼上周六舉行同性戀大遊行	1
YD2005-267	News	HIV Surveillance	Mainland	PLHIV	2005-03-11	2005-03-06	2005-03-01	2005	230	1193	1	愛滋病患料達84 萬	1
LPK2005-221	News	HIV Science	Overseas	General public	2005-03-12	2005-03-06	2005-03-01	2005	210	1190	1	10% of European have resistance to HIV	2.2
YD2005-263	News	HIV Prevention	Mainland	PLHIV	2005-03-13	2005-03-13	2005-03-01	2005	226	1185	1	華首次人體試驗愛滋疫苗	1
YD2005-265	News	Events	Overseas	General Public	2005-03-13	2005-03-13	2005-03-01	2005	228	1188	1	第十屆全國「紅鼻子日」籌款活動，為英國慈善體團及非洲國家的愛滋病患者籌款	1
LPK2005-220	News	HIV Science	Overseas	PLHIV	2005-03-13	2005-03-13	2005-03-01	2005	209	1186	1	Sperm washing allowed AIDS patients obtaining healthy offsprings	2.2
LPK2005-218	News	HIV testing	Mainland China	Others -Pregnant Women	2005-03-14	2005-03-13	2005-03-01	2005	207	1182	1	Pregnant women in Yunnan received HIV testing	2.2
LPK2005-219	News	HIV Vaccine	Mainland China	General public	2005-03-14	2005-03-13	2005-03-01	2005	208	1183, 1185	2	No adverse effect is found from injecting HIV vaccine developed in mainland	2.2
YD2005-260	News	Events	Overseas	Celebrity	2005-03-16	2005-03-13	2005-03-01	2005	224	1179	1	莎朗史東獲哈佛表揚 for the work he had done for AIDS patients	1
YD2005-259	News	Others-MSM related movies	HK	MSM	2005-03-17	2005-03-13	2005-03-01	2005	223	1176	1	《GAY的疑惑》MSM related movie	1
YD2005-258	News	Events	Overseas	Homosexuals	2005-03-19	2005-03-13	2005-03-01	2005	222	1172	1	同性戀知識擬納入小學教材	1
YD2005-257	News	Events	Overseas	Celebrity	2005-03-20	2005-03-20	2005-03-01	2005	221	1168, 1167	2	愛滋病演唱會籌款	1
LPK2005-216	News	Events	Overseas	Celebrity	2005-03-21	2005-03-20	2005-03-01	2005	206	1163, 1164, 1168	3	Celebrity joined events to appeal the public to concern for AIDS patients, also solicited for support	2.2
YD2005-255	News	HIV Transmission and Risks	HK	PLHIV	2005-03-22	2005-03-20	2005-03-01	2005	217	1160	1	亂傳愛滋影響大	1
YD2005-254	News	Events	Overseas	Celebrity	2005-03-23	2005-03-20	2005-03-01	2005	220	1157	1	英國名師配飾今日慈善拍賣	1
LPK2005-213	News	HIV Transmission or Risk	HK	General public	2005-03-23	2005-03-20	2005-03-01	2005	204	1155	1	Suspected people sting a student with a syringe	2.2
YD2005-253	News	HIV Science	Overseas	PLHIV	2005-03-23	2005-03-20	2005-03-01	2005	219	1156	1	美研究證實愛滋病毒變種	2.2
YD2005-251	News	Events	HK	Celebrity	2005-03-25	2005-03-20	2005-03-01	2005	217	1151	1	「英式情懷」慈善拍賣活動	1
YD2005-249	News	Events	Mainland	Celebrity	2005-03-26	2005-03-20	2005-03-01	2005	215	1146, 1147	1	Yanhua Yang and Xiaodong Chen came to shanxi and visited AIDS orphans	2.2
YD2005-250	News	HIV Transmission and Risks	Overseas	PLHIV	2005-03-26	2005-03-20	2005-03-01	2005	216	1148	1	加愛滋婦勾搭士兵被起訴	2.2
LPK2005-209	News	HIV Science	Taiwan	PLHIV	2005-03-27	2005-03-27	2005-03-01	2005	201	1144	1	Breakthrough of curing AIDS by gene therapy	1
YD2005-248	News	Events	Mainland	PLHIV	2005-03-27	2005-03-27	2005-03-01	2005	224	1143	1	溫總回信鼓勵愛滋孤兒	2.2
LPK2005-207	News	Social Issues	Overseas	General Public - Fishermen	2005-03-28	2005-03-27	2005-03-01	2005	199	1142	1	HIV infection rate of fishmen is just below the sex workers	2.2
YD2005-245	News	Events	Overseas	Celebrity	2005-03-30	2005-03-27	2005-03-01	2005	221	1129	1	提醒Fans 關懷愛滋	1
YD2005-246	News	Events	Overseas	Homosexuals	2005-03-30	2005-03-27	2005-03-01	2005	222	1135	1	比利基斯度 獲同志表揚成就	1
LPK2005-206	News	Events	Overseas	PLHIV	2005-03-31	2005-03-27	2005-03-01	2005	198	1129	1	Celebrity appeal the public to concern for AIDS patients	1
LPK2005-205	News	Events	Overseas	Celebrity	2005-04-02	2005-03-27	2005-04-01	2005	197	1122	1	Celebrity donated all revenue of selling cosmetics to AIDS Fund	1
YD2005-243	News	Events	Overseas	Celebrity	2005-04-02	2005-03-27	2005-04-01	2005	219	1122	1	Pamela Anderson heps AiDS patients	1
YD2005-244	News	Events	Overseas	General Public	2005-04-02	2005-03-27	2005-04-01	2005	220	1123	1	A man traveled through 31 countries and on his way he broadcasted AIDS issues	1
YD2005-242	News	Events	Overseas	MSM	2005-04-03	2005-04-03	2005-04-01	2005	218	1120	1	本年度最佳大碟 《Want Two》Rufus Wainwright 自小Rufus就以同性戀姿態面對群眾	1
YD2005-239	News	Events	Mainland	Celebrity	2005-04-04	2005-04-03	2005-04-01	2005	215	1113, 1114	2	Yanhua Yang and Xiaodong Chen came to shanxi and visited AIDS orphans	1
YD2005-240	News	Events	Overseas	MSM	2005-04-04	2005-04-03	2005-04-01	2005	216	1115	1	首個「同志」教會 暗示耶穌同性戀	1
YD2005-241	News	HIV Transmission and Risks	HK	PLHIV	2005-04-04	2005-04-03	2005-04-01	2005	217	1116	1	亂傳愛滋影響大	1
LPK2005-204	Editorial	HIV Transmission or Risk	Overseas	General public	2005-04-05	2005-04-03	2005-04-01	2005	196	1109	1	Probability of infected by HIV is low if no sexual intercourse is happened	1
YD2005-238	News	Events	Overseas	PLHIV	2005-04-06	2005-04-03	2005-04-01	2005	214	1106	1	泰國芭堤雅周二有屬於愛滋病組織的示威者參與反《自由貿易協議》巡遊	1
YD2005-237	Movies	Others-MSM related movies	Overseas	MSM	2005-04-07	2005-04-03	2005-04-01	2005	213	1104, 1105	2	《真》MSM related movies	1
YD2005-235	Movies	Others-MSM related documentary	HK	MSM	2005-04-08	2005-04-03	2005-04-01	2005	210	1100	1	世紀末的愛 Cold Case (II)：It's Raining Men	1
LPK2005-202	News	HIV Transmission or Risk	Mainland China	General public	2005-04-08	2005-04-03	2005-04-01	2005	194	1098, 1099	2	AIDS spreads in Yunnan in 12 years	2.2
YD2005-236	News	Events	Overseas	Celebrity	2005-04-08	2005-04-03	2005-04-01	2005	212	1102	1	Bono 畢仔 聯手抗貧抗愛滋	2.2
YD2005-233	News	HIV Transmission and Risks	Mainland	PLHIV	2005-04-09	2005-04-03	2005-04-01	2005	208	1097	1	Because of poverty people sale blood and infected with HIV	1
YD2005-232	News	HIV Education and Awareness	Mainland	Celebrity	2005-04-09	2005-04-03	2005-04-01	2005	207	1096	1	姚明 宣揚愛滋病訊息	2.2
LPK2005-200	News	HIV Transmission or Risk	Mainland China	General public	2005-04-10	2005-04-10	2005-04-01	2005	192	1091	1	Poor hygiene of foot massage may help to spread HIV	2.2
LPK2005-199	News	HIV Vaccine	Overseas	General public	2005-04-13	2005-04-10	2005-04-01	2005	191	1081	1	Clinical test of HIV vaccine failed	2.2
YD2005-229	News	Events	Overseas	PLHIV	2005-04-15	2005-04-10	2005-04-01	2005	204	1072, 1073	2	越首爆愛滋女同染禽流	1
YD2005-228	News	Events	Overseas	MSM	2005-04-17	2005-04-17	2005-04-01	2005	203	1067	1	Trevor L Blumas was suspected to be gay	1
YD2005-227	News	Events	Overseas	MSM	2005-04-18	2005-04-17	2005-04-01	2005	202	1065	1	姬蒂男友 曾為毒品做鴨	1
YD2005-226	News	Events	Overseas	MSM	2005-04-19	2005-04-17	2005-04-01	2005	201	1062	1	《林肯的私人世界》claimed that Lincoln was gay	1
YD2005-224	News	Events	Overseas	Celebrity	2005-04-22	2005-04-17	2005-04-01	2005	197	1049	1	Chenglong came to Vietnam and care about AIDS patients	1
LPK2005-197	News	Social Issues	Overseas	General public	2005-04-22	2005-04-17	2005-04-01	2005	189	1048	1	2 British AIDS patients accused the government for insufficient promotion of HIV prevention	2.2
YD2005-225	News	HIV Transmission and Risks	Overseas	PLHIV	2005-04-22	2005-04-17	2005-04-01	2005	200	1052	1	女生揚言愛滋傳百男生	2.2
LPK2005-196	News	HIV Transmission or Risk	Mainland China	General public	2005-04-23	2005-04-17	2005-04-01	2005	188	1046	1	Reused syringe suspected to spread of AIDS in Yangtze River Delta	2.2
YD2005-221	News	Events	Overseas	Celebrity	2005-04-25	2005-04-24	2005-04-01	2005	197	1039	1	Chenglong came to Vietnam and played games with children who lefe by their AIDS parents	1
YD2005-219	News	Social Issue	HK	Homosexuals	2005-04-27	2005-04-24	2005-04-01	2005	195	1034	1	People should not discriminate homosexuals	1
LPK2005-195	Editorial	Social Issues	HK	Homosexuals	2005-04-27	2005-04-24	2005-04-01	2005	187	1036	1	Government should not make homosexuality education compulsory	2.2
LPK2005-194	News	Social Issues	Overseas	Homosexuals	2005-04-28	2005-04-24	2005-04-01	2005	186	1031	1	A British man accused HSBC discriminating his sexual orientation	1
YD2005-218	News	Events	Overseas	Celebrity	2005-04-28	2005-04-24	2005-04-01	2005	194	1033	1	紅星畢彼特日前遠赴埃塞俄比亞，探訪患有愛滋病的孤兒	1
LPK2005-193	News	Surveillance	Overseas	PLHIV	2005-04-29	2005-04-24	2005-04-01	2005	185	1026	1	Thailand and Uganda drastically reduce HIV infection rates	2.2
LPK2005-192	News	Social Issues	Mainland China	PLHIV	2005-04-30	2005-04-24	2005-04-01	2005	184	1025	1	Hotels rejected to held the wedding party for AIDS patients	2.2
YD2005-215	News	Events	HK	PLHIV	2005-05-01	2005-05-01	2005-05-01	2005	191	1020	1	Two stowaways from Vietnam said they are AIDS patients	1
LPK2005-191	News	HIV Transmission or Risk	Overseas	General public	2005-05-01	2005-05-01	2005-05-01	2005	183	1019	1	An American girl used a syringe to sting her schoolmates	2.2
YD2005-213	News	Events	HK	Homosexuals	2005-05-03	2005-05-01	2005-05-01	2005	189	1015	1	天主教香港教區主教陳日君反对同性恋	1
LPK2005-189	News	HIV Transmission or Risk	Mainland China	PLHIV	2005-05-06	2005-05-01	2005-05-01	2005	181	1008	1	Medicine used for preventing HIV transmitted from the mother to offspring	1
LPK2005-190	News	Social Issues	Overseas	PLHIV	2005-05-06	2005-05-01	2005-05-01	2005	182	1009	1	Clinical treatment for AIDS kids in America is not under surveillence	1
LPK2005-188	News	Events	Overseas	PLHIV	2005-05-07	2005-05-01	2005-05-01	2005	180	1005	1	Demostration appealing public to concern for AIDS patients	1
LPK2005-187	Editorial	Social Issues	HK	Homosexuals	2005-05-09	2005-05-08	2005-05-01	2005	179	999	1	Editor appealed homosexuals to have normal sexual orientation	1
YD2005-212	News	Events	Overseas	MSM	2005-05-10	2005-05-08	2005-05-01	2005	188	996	1	以藝術家邀巴同志 搞基	1
LPK2005-186	Editorial	Policy and Laws	HK	Homosexuals	2005-05-13	2005-05-08	2005-05-01	2005	178	990	1	Editor objected to SODO	2.2
YD2005-210	News	Events	HK	Homosexuals	2005-05-17	2005-05-15	2005-05-01	2005	186	978981	2	350人 上街 促消除對同志恐懼	2.2
LPK2005-184	Editorial	Social Issues	HK	Homosexuals	2005-05-18	2005-05-15	2005-05-01	2005	176	973	1	Editor thinked that public should concern for homosexuality	1
LPK2005-183	News	Policy and Laws	HK	Homosexuals	2005-05-18	2005-05-15	2005-05-01	2005	175	972	1	Christian organizations object to SODO	2.2
LPK2005-182	News	Policy and Laws	HK	Homosexuals	2005-05-21	2005-05-15	2005-05-01	2005	174	964	1	Consultation of SODO is delayed	1
LPK2005-181	Editorial	Social Issues	HK	Homosexuals	2005-05-21	2005-05-15	2005-05-01	2005	173	961	1	Christian organizations object to homosexuality	2.2
LPK2005-177	Editorial	Social Issues	HK	Homosexuals	2005-05-23	2005-05-22	2005-05-01	2005	169	953	1	Editor objected to homosexuality	1
LPK2005-178	News	Policy and Laws	HK	Homosexuals	2005-05-23	2005-05-22	2005-05-01	2005	170	954	1	SODO may be abused	1
LPK2005-179	News	Events	Overseas	PLHIV	2005-05-23	2005-05-22	2005-05-01	2005	171	955	1	Events for collecting money to help AIDS patients	1
LPK2005-180	News	Policy and Laws	HK	Homosexuals	2005-05-23	2005-05-22	2005-05-01	2005	172	956	1	SODO is a controversial topic	1
YD2005-207	News	Events	Overseas	Celebrity	2005-05-23	2005-05-22	2005-05-01	2005	183	955	1	艾頓莊 維也納關懷愛滋	1
LPK2005-176	Editorial	Policy and Laws	HK	MSM	2005-05-23	2005-05-22	2005-05-01	2005	168	952	1	MSM appeal for law of same-sex marriage	2.2
LPK2005-175	News	Surveillance	HK	PLHIV	2005-05-25	2005-05-22	2005-05-01	2005	167	945-947	3	65 news AIDS cases occurred and number of MSM suffered from AIDS has an increasing trend	2.2
YD2005-204	News	Events	Overseas	Celebrity	2005-05-26	2005-05-22	2005-05-01	2005	180	940941	2	艾頓莊號召 44美女呼應 Victoria全裸救愛滋病人	2.2
LPK2005-173	News	HIV Prevention		General public	2005-05-27	2005-05-22	2005-05-01	2005	165	938	1	HIV prevention	1
LPK2005-172	News	Celebrities	Overseas	General public	2005-05-30	2005-05-29	2005-05-01	2005	164	934	1	A football player suspected to be suffered from AIDS	1
YD2005-203	News	Social Issue	Mainland	PLHIV	2005-05-30	2005-05-29	2005-05-01	2005	179	928	1	深圳愛滋匪幫恃病犯案	2.2
LPK2005-170	News	Policy and Laws	HK	Homosexuals	2005-05-31	2005-05-29	2005-05-01	2005	162	927	1	Requirement of homosexuals (law)	2.2
LPK2005-169	News	Celebrities	HK	PLHIV	2005-06-01	2005-05-29	2005-06-01	2005	161	926	1	Li Ka Shing put effort into things related to AIDS	1
YD2005-201	News	Events	HK	PLHIV	2005-06-03	2005-05-29	2005-06-01	2005	177	914	1	《孩子做得到！》一本愛滋遺孤漫畫集	1
YD2005-200	News	Events	Overseas	Celebrity	2005-06-07	2005-06-05	2005-06-01	2005	176	907	1	彭美拉為愛滋籌款	2.2
LPK2005-167	News	HIV Science	Mainland China	General public	2005-06-09	2005-06-05	2005-06-01	2005	159	902	1	Acupuncture for reducing body weight may easily infected by HIV/AIDS	1
YD2005-199	News	Events	Overseas	MSM	2005-06-11	2005-06-05	2005-06-01	2005	175	899	1	英出版少年性愛小冊 文字露骨 灌輸口交肛交觀念	1
LPK2005-166	News	Events	Overseas	Homosexuals	2005-06-12	2005-06-12	2005-06-01	2005	158	895	1	Homosexual demostration in Israel	1
LPK2005-164	News	Surveillance	Overseas	PLHIV	2005-06-13	2005-06-12	2005-06-01	2005	156	890	1	Number of female suffered from AIDS surged	2.2
YD2005-198	News	Events	Overseas	PLHIV	2005-06-13	2005-06-12	2005-06-01	2005	174	891	1	SPAIN Metro MadridMany Spaniards don't know they have HIV	2.2
LPK2005-163	News	HIV Science	Overseas	General public	2005-06-14	2005-06-12	2005-06-01	2005	155	888	1	Female is more easily to be suffered from AIDS	1
LPK2005-162	News	Policy and Laws	Mainland China	General public	2005-06-14	2005-06-12	2005-06-01	2005	154	884	1	Chinese government claimed that it can control spread of AIDS	2.2
LPK2005-161	News	Policy and Laws	Mainland China	General public	2005-06-15	2005-06-12	2005-06-01	2005	153	882	1	China limited the NGOs' work for HIV prevention	2.2
LPK2005-160	News	Policy and Laws	HK	MSM	2005-06-18	2005-06-12	2005-06-01	2005	152	878	1	MSM appeal for age of consent of anal sex	2.2
LPK2005-158	News	Events	HK	Homosexuals	2005-06-20	2005-06-19	2005-06-01	2005	150	873	1	Organizations hope that homosexuals can lead the demostration	1
LPK2005-159	News	Social Issues	Overseas	General public	2005-06-20	2005-06-19	2005-06-01	2005	151	874	1	Japanese youngsters do not have sufficient knowledge about AIDS	1
LPK2005-156	News	Celebrities	Mainland China	PLHIV	2005-06-24	2005-06-19	2005-06-01	2005	148	861	1	Celebrities concern for AIDS patients	1
LPK2005-157	News	Events	HK	Homosexuals	2005-06-24	2005-06-19	2005-06-01	2005	149	866	1	Homosexuals leads the demostration	1
LPK2005-155	News	Surveys	HK	General public	2005-06-24	2005-06-19	2005-06-01	2005	147	859	1	Hong Kong government conducted a survey related to homosexuality	2.2
YD2005-191	News	Events	Overseas	Celebrity	2005-06-25	2005-06-19	2005-06-01	2005	167	850	1	艾殊莉茱迪 談愛滋有紋有路	1
YD2005-192	News	Events	Overseas	Celebrity	2005-06-25	2005-06-19	2005-06-01	2005	168	851	1	Gay celebrity raise funds for AIDS patients	1
LPK2005-154	News	Social Issues	Mainland China	PLHIV	2005-06-27	2005-06-26	2005-06-01	2005	146	842	1	Cases of an AIDS family	1
LPK2005-153	News	Events	Overseas	Homosexuals	2005-06-28	2005-06-26	2005-06-01	2005	145	841	1	Homosexual demostration in New York	1
YD2005-190	News	Events	Mainland	PLHIV	2005-06-28	2005-06-26	2005-06-01	2005	166	842	1	一家三口全部感染愛滋病病毒	1
LPK2005-151	News	Social Issues	Overseas	PLHIV	2005-06-28	2005-06-26	2005-06-01	2005	144	839	1	Indian company helped AIDS patients to find their companion	2.2
LPK2005-149	News	HIV Science	Overseas	PLHIV	2005-06-30	2005-06-26	2005-06-01	2005	142	832	1	Garlic may be more effective to cure AIDS	2.2
LPK2005-150	News	Policy and Laws	Overseas	Homosexuals	2005-06-30	2005-06-26	2005-06-01	2005	143	833	1	Same-sex marriage is allowed in Canada	2.2
LPK2005-148	News	HIV Transmission or Risk	Mainland China	General public	2005-07-01	2005-06-26	2005-07-01	2005	141	831	1	Blood donors suffered from AIDS in Guangdong	1
LPK2005-147	News	Social Issues	HK	Homosexuals	2005-07-02	2005-06-26	2005-07-01	2005	140	821, 822	2	People appeal for respecting rights of homosexuals	1
LPK2005-146	News	HIV Science	Mainland China	General public	2005-07-05	2005-07-03	2005-07-01	2005	139	812	1	Chinese HIV may be mutated	2.2
YD2005-184	News	Others-article about MSM	HK	Homosexuals	2005-07-06	2005-07-03	2005-07-01	2005	160	810	1	性向非自決	2.2
YD2005-185	News	HIV Education and Awareness	Overseas	Celebrity	2005-07-06	2005-07-03	2005-07-01	2005	161	811	1	艾頓莊歌聲抗愛滋	2.2
YD2005-183	News	Events	Overseas	Celebrity	2005-07-07	2005-07-03	2005-07-01	2005	159	800, 802,804	3	安琪蓮娜偕畢仔 領養愛滋遺孤	1
YD2005-182	News	HIV Transmission and Risks	Overseas	PLHIV	2005-07-09	2005-07-03	2005-07-01	2005	158	795	1	瑪麗嘉兒愛滋家姐賣淫被捕	1
LPK2005-143	News	HIV Transmission or Risk	Mainland China	PLHIV	2005-07-09	2005-07-03	2005-07-01	2005	136	794	1	Suspected people claimed as AIDS patients and extort others	2.2
YD2005-180	News	Others-article about MSM	HK	MSM	2005-07-10	2005-07-10	2005-07-01	2005	156	792	1	anal sex	1
YD2005-179	News	Events	HK	Celebrity	2005-07-10	2005-07-10	2005-07-01	2005	106	791	1	姚明 九月來港關懷愛滋	2.2
YD2005-178	News	HIV Treatment	Mainland	PLHIV	2005-07-11	2005-07-10	2005-07-01	2005	155	787	1	中國首創第四代愛滋藥臨床試驗	1
LPK2005-140	News	Events	Overseas	Homosexuals	2005-07-12	2005-07-10	2005-07-01	2005	133	786	1	Homosexuals demonstration	1
LPK2005-141	News	HIV Science	Mainland China	PLHIV	2005-07-12	2005-07-10	2005-07-01	2005	134	787	1	4th generation of AIDS medicine founded in China	1
LPK2005-139	News	HIV Education and Awareness	Overseas	Homosexuals	2005-07-13	2005-07-10	2005-07-01	2005	132	781	1	Homosexuals in Norway detrude softdrinks for appealing tolerance of homosexuals	1
LPK2005-138	News	Surveillance	Mainland China	PLHIV	2005-07-17	2005-07-17	2005-07-01	2005	131	774	1	Number of AIDS cases increased by 40% in a year	1
YD2005-177	News	Surveys	Overseas	MSM	2005-07-18	2005-07-17	2005-07-01	2005	154	771	1	One gay marriage ever 30 minutes	1
YD2005-176	News	Events	Overseas	Celebrity	2005-07-19	2005-07-17	2005-07-01	2005	153	765	1	李察基爾停救助印度愛滋童	2.2
LPK2005-136	News	HIV Transmission or Risk	Overseas	PLHIV	2005-07-20	2005-07-17	2005-07-01	2005	129	762	1	An AIDS patient conceal the health condition and having insafe sex with her boyfriend	2.2
LPK2005-134	News	Social Issues	HK	General public	2005-07-22	2005-07-17	2005-07-01	2005	127	754	1	Anti-discrimination of sexual orientation is controversial	1
LPK2005-135	News	Policy and Laws	HK	MSM	2005-07-22	2005-07-17	2005-07-01	2005	128	755	1	MSM challenging age of consent of anal sex	2.2
YD2005-173	News	HIV Transmission and Risks	Mainland	PLHIV	2005-07-24	2005-07-24	2005-07-01	2005	151	749	1	大學生及民工屬愛滋重災群	1
YD2005-172	Movies	HIV Education and Awareness	Overseas	PLHIV	2005-07-26	2005-07-24	2005-07-01	2005	150	743	1	AIDS related movie Angel in America	1
YD2005-171	News	Events	Overseas	MSM	2005-07-27	2005-07-24	2005-07-01	2005	149	741	1	濫交提分手 男同伴邀最後激情 SM漢遭鐵鏈鎖身刺死	1
LPK2005-132	News	HIV Science	Overseas	General public	2005-07-28	2005-07-24	2005-07-01	2005	125	737, 739	2	Circumcision can reduce probability of HIV infection of male	2.2
LPK2005-133	News	HIV Science	Mainland China	PLHIV	2005-07-28	2005-07-24	2005-07-01	2005	126	738	1	HIV presents in AIDS patient's eyes	2.2
YD2005-168	News	Surveys	Taiwan	MSM	2005-08-01	2005-07-31	2005-08-01	2005	146	727	1	台男同志網上援交急增	1
YD2005-167	News	HIV Education and Awareness	HK	PLHIV	2005-08-02	2005-07-31	2005-08-01	2005	145	723	1	AIDS	1
LPK2005-131	News	HIV Transmission or Risk	Mainland China	General Public - Drug Takers	2005-08-03	2005-07-31	2005-08-01	2005	124	720	1	Druggies claimed as AIDS patients and extort others	2.2
LPK2005-130	News	Events	Overseas	Homosexuals	2005-08-08	2005-08-07	2005-08-01	2005	123	712	1	Homosexuals in Netherland held parade	1
YD2005-165	News	Events	Overseas	MSM	2005-08-09	2005-08-07	2005-08-01	2005	143	705-708	4	美林董事妻知夫同性戀震驚	1
LPK2005-128	News	HIV testing	HK	PLHIV	2005-08-11	2005-08-07	2005-08-01	2005	121	691	1	More time is needed for HIV testing	2.2
LPK2005-129	News	HIV testing	HK	General Public	2005-08-11	2005-08-07	2005-08-01	2005	122	692	1	New HIV test kit has 99.8% accuracy	2.2
YD2005-162	News	HIV Surveillance	Mainland	PLHIV	2005-08-12	2005-08-07	2005-08-01	2005	140	688	1	Current situation of AIDS spread in Mainland	1
LPK2005-127	News	Social Issues	Mainland China	PLHIV	2005-08-13	2005-08-07	2005-08-01	2005	120	682	1	Living condition of AIDS orphans is poor	2.2
YD2005-160	News	HIV Treatment	Overseas	PLHIV	2005-08-14	2005-08-14	2005-08-01	2005	138	680	1	癲癇藥可大減愛滋病毒	2.2
LPK2005-123	Editorial	Social Issues	HK	General public	2005-08-16	2005-08-14	2005-08-01	2005	116	670	1	Article about SODO	1
LPK2005-124	News	Policy and Laws	Overseas	Homosexuals	2005-08-16	2005-08-14	2005-08-01	2005	117	671	1	Homosexuals are allowed to join the army in Thailand	1
LPK2005-125	News	Others	Mainland China	General public	2005-08-16	2005-08-14	2005-08-01	2005	118	672	1	Fudan University launched programme about homosexuals	1
LPK2005-122	News	Surveillance	Mainland China	MSM	2005-08-16	2005-08-14	2005-08-01	2005	115	669	1	Number of MSM in mainland reached 10 millions	2.2
LPK2005-120	News	Surveillance	HK	PLHIV	2005-08-17	2005-08-14	2005-08-01	2005	113	661, 662, 664, 666	4	70 people infected by HII in second quarter	2.2
YD2005-158	News	HIV Science	Overseas	PLHIV	2005-08-17	2005-08-14	2005-08-01	2005	136	663	1	美澳採鱷魚血 研製抗生素殺HIV	2.2
LPK2005-119	Editorial	Social Issues	HK	General public	2005-08-19	2005-08-14	2005-08-01	2005	112	657	1	Editor said that more work should do to promote safe sex	1
YD2005-156	News	Events	HK	PLHIV	2005-08-19	2005-08-14	2005-08-01	2005	134	657	1	曾經相處的三個愛滋病人	1
YD2005-155	News	Events	Overseas	Celebrity	2005-08-21	2005-08-21	2005-08-01	2005	133	650	1	艾殊莉非洲探訪妓女, teaching them knowledge of HIV prevention	2.2
LPK2005-117	News	Policy and Laws	Overseas	Homosexuals	2005-08-22	2005-08-21	2005-08-01	2005	110	645	1	Homosexual scenes in movies are cut in Singapore	2.2
YD2005-153	News	HIV Surveillance	Overseas	PLHIV	2005-08-23	2005-08-21	2005-08-01	2005	131	639	1	星洲年輕愛滋病人大增	2.2
LPK2005-113	Editorial	Social Issues	HK	Homosexuals	2005-08-25	2005-08-21	2005-08-01	2005	106	621	1	Editor said that law involved in discrimination should be banned	1
LPK2005-112	Editorial	Surveillance	Overseas	PLHIV	2005-08-25	2005-08-21	2005-08-01	2005	105	620	1	There are hidden fact behind the AIDS infection data	2.2
YD2005-150	News	Policy and Law	HK	MSM	2005-08-25	2005-08-21	2005-08-01	2005	126	619, 621-625, 627, 629, 630,631, 633	11	The age issue of law that allow men have anal sex	2.2
YD2005-152	News	Policy and Law	Overseas	Homosexuals	2005-08-25	2005-08-21	2005-08-01	2005	130	626	1	加州同性戀離異須贍養子女	2.2
YD2005-148	News	HIV Education and Awareness	HK	PLHIV	2005-08-26	2005-08-21	2005-08-01	2005	127	615	1	愛滋病患者義務工作分享會	1
YD2005-149	News	Events	HK	MSM	2005-08-26	2005-08-21	2005-08-01	2005	128	618	1	A gay described his own story	1
LPK2005-110	News	Policy and Laws	HK	MSM	2005-08-26	2005-08-21	2005-08-01	2005	104	613	1	High court declared a law related to MSM is violate The Basic Law	2.2
YD2005-146	News	Policy and Law	HK	MSM	2005-08-27	2005-08-21	2005-08-01	2005	126	608	1	The age issue of law that allow men have anal sex	1
LPK2005-109	Editorial	Policy and Laws	HK	MSM	2005-08-28	2005-08-28	2005-08-01	2005	103	604	1	Editor object to judgement of the law related to age of consent of MSM	2.2
YD2005-144	News	Policy and Law	Overseas	MSM	2005-08-29	2005-08-28	2005-08-01	2005	125	599	1	教廷擬禁同性戀者任神父	2.2
LPK2005-107	News	Policy and Laws	Overseas	General public	2005-08-30	2005-08-28	2005-08-01	2005	101	596	1	China and American cooperate in HIV/AIDS prevention	1
LPK2005-106	News	Surveillance	Mainland China	PLHIV	2005-09-02	2005-08-28	2005-09-01	2005	100	582	1	Number of sex workers suffered from HIV increased by 50 times in 10 years	2.2
YD2005-142	News	Sex-related crime	HK	MSM	2005-09-03	2005-08-28	2005-09-01	2005	123	579	1	gays played SM game and killed another male	1
LPK2005-104	News	Celebrities	Mainland China	PLHIV	2005-09-04	2005-09-04	2005-09-01	2005	98	574	1	Clinton may visit Chinese AIDS patients	2.2
LPK2005-105	News	Policy and Laws	Overseas	Homosexuals	2005-09-04	2005-09-04	2005-09-01	2005	99	576	1	Homosexuals in California may have same-sex marrige legally	2.2
LPK2005-103	News	Events	HK	General public	2005-09-05	2005-09-04	2005-09-01	2005	97	571	1	Government held promotion event for safe sex	1
YD2005-139	News	Sex-related crime	Taiwan	MSM	2005-09-05	2005-09-04	2005-09-01	2005	120	570, 572	2	同志孽戀潑鏹毀容收場	1
LPK2005-102	News	Policy and Laws	Overseas	Homosexuals	2005-09-09	2005-09-04	2005-09-01	2005	96	557	1	Governor of California will ban the law of same-sex marriage	2.2
LPK2005-101	News	Social Issues	Overseas	Homosexuals	2005-09-11	2005-09-11	2005-09-01	2005	95	550	1	HSBC involved in discrimination of homosexuals	2.2
LPK2005-099	Editorial	Social Issues	HK	General public	2005-09-15	2005-09-11	2005-09-01	2005	93	529	1	Advertisment about using condom may lead to increase in number of MSM	1
LPK2005-100	News	HIV Education and Awareness	HK	Others	2005-09-15	2005-09-11	2005-09-01	2005	94	536	1	Whoremasters have wrong concept about AIDS	1
YD2005-135	News	Social Issue	HK	MSM	2005-09-15	2005-09-11	2005-09-01	2005	116	529	1	Issues about anal sex	1
YD2005-136	News	Events	HK	MSM	2005-09-15	2005-09-11	2005-09-01	2005	117	533	1	變態色狼非禮男人	1
YD2005-134	News	HIV Test	HK	General Public	2005-09-15	2005-09-11	2005-09-01	2005	115	527	1	為二百嫖客測試愛滋	2.2
LPK2005-097	News	HIV Treatment	HK	PLHIV	2005-09-17	2005-09-11	2005-09-01	2005	91	523	1	"AIDS Cocktail" lower the death rate of AIDS	1
LPK2005-096	News	Social Issues	Overseas	MSM	2005-09-19	2005-09-18	2005-09-01	2005	90	515	1	MSM poster in Rome being criticized	2.2
YD2005-132	News	HIV Prevention	Taiwan	General Public	2005-09-20	2005-09-18	2005-09-01	2005	113	514	1	台修正「捐血者健康標準」	1
YD2005-131	News	Social Issue	Mainland	PLHIV	2005-09-21	2005-09-18	2005-09-01	2005	112	511	1	AIDS patient blackmailed polics	1
LPK2005-094	News	Policy and Laws	HK	MSM	2005-09-21	2005-09-18	2005-09-01	2005	88	501	1	Health care workers object to lower age of consent of MSM	2.2
LPK2005-095	News	Policy and Laws	HK	MSM	2005-09-21	2005-09-18	2005-09-01	2005	89	503, 505	2	Hong Kong government is considering appeal for the case of anal sex	2.2
YD2005-130	News	Events	HK	Celebrity	2005-09-21	2005-09-18	2005-09-01	2005	106	504, 509	2	Yaoming came to HK and help broacast AIDS prevention	2.2
LPK2005-091	News	Celebrities	HK	General public	2005-09-22	2005-09-18	2005-09-01	2005	86	500	1	Yao Ming promotes prevention of AIDS and help in money donation	1
YD2005-127	News	Others-article about MSM	HK	Homosexuals	2005-09-22	2005-09-18	2005-09-01	2005	109	495	1	性與政治	1
LPK2005-093	News	Surveillance	HK	PLHIV	2005-09-22	2005-09-18	2005-09-01	2005	87	494	1	AIDS professional said that there are too many new AIDS cases in Hong Kong	2.2
LPK2005-089	News	HIV Science	HK	General public	2005-09-23	2005-09-18	2005-09-01	2005	84	481	1	AIDS professional said that HIV mutate quickly	1
LPK2005-090	News	Celebrities	HK	General public	2005-09-23	2005-09-18	2005-09-01	2005	85	485, 486	2	Celebrities support AIDS patients	1
YD2005-120	News	Others-MSM realted movies	HK	MSM	2005-09-27	2005-09-25	2005-09-01	2005	102	464	1	「斷袖分桃」MSM realted movie	2.2
YD2005-118	Movies	Others-MSM realted movies	HK	MSM	2005-09-28	2005-09-25	2005-09-01	2005	100	457	1	<愛我哉>MSM related movie	1
LPK2005-086	News	Surveys	HK	Homosexuals	2005-09-28	2005-09-25	2005-09-01	2005	81	455, 456, 460	3	68% respondents do not resist to get along with homosexuals, but more than 50% of them disagree with same-sex marriage	2.2
LPK2005-087	News	HIV Prevention	Mainland China	General public	2005-09-28	2005-09-25	2005-09-01	2005	82	458	1	Chinese government bought condoms and deliver to society which is free of charge	2.2
LPK2005-085	News	HIV Science	Overseas	PLHIV	2005-09-29	2005-09-25	2005-09-01	2005	80	450	1	A pharmacetical company claimed that a chemical from citrus can cure AIDS	2.2
LPK2005-084	News	HIV Science	Overseas	General public	2005-09-30	2005-09-25	2005-09-01	2005	79	449	1	The power of HIV seems to be weaken	2.2
LPK2005-083	News	Policy and Laws	HK	MSM	2005-10-01	2005-09-25	2005-10-01	2005	78	447	1	The government appeal for the MSM case	2.2
YD2005-113	News	Others-article about MSM	Overseas	MSM	2005-10-03	2005-10-02	2005-10-01	2005	95	437	1	MSM in ancient Greek	1
LPK2005-082	News	Policy and Laws	Mainland China	PLHIV	2005-10-05	2005-10-02	2005-10-01	2005	77	431	1	Mainland banned AIDS patient to join the army	2.2
LPK2005-081	News	Policy and Laws	Overseas	Homosexuals	2005-10-07	2005-10-02	2005-10-01	2005	76	421	1	Singaporen president rejects homosexuals to be a cabinet	2.2
YD2005-110	News	Events	HK	PLHIV	2005-10-08	2005-10-02	2005-10-01	2005	96	417	1	「關懷愛滋」炮轟明光社	1
LPK2005-080	News	Surveys	HK	Homosexuals	2005-10-08	2005-10-02	2005-10-01	2005	75	416, 420	2	25% of CUHK medicine students misunderstand homosexuals	2.2
YD2005-108	News	Events	Overseas	Homosexuals	2005-10-09	2005-10-09	2005-10-01	2005	94	412	1	Homosexuals in Singapore	1
YD2005-107	News	Events	Overseas	MSM	2005-10-10	2005-10-09	2005-10-01	2005	93	411	1	Westlife成員力撐Mark與同性結婚	1
LPK2005-079	Editorial	Policy and Laws	HK	Homosexuals	2005-10-10	2005-10-09	2005-10-01	2005	74	410	1	Editor disagree with legalization of homosexuality	2.2
YD2005-105	News	Policy and Law	Overseas	PLHIV	2005-10-12	2005-10-09	2005-10-01	2005	91	402	1	Seven kinds of infectious diseases are not allowed to enter US	1
LPK2005-078	News	HIV Prevention	Overseas	General public	2005-10-13	2005-10-09	2005-10-01	2005	73	395	1	American businessman sell condoms to people in developing countries with a lower price	1
LPK2005-077	News	Social Issues	Mainland China	MSM	2005-10-16	2005-10-16	2005-10-01	2005	72	388	1	Mainland's MSM gathering in parks and harass pedestrians	2.2
LPK2005-076	News	Surveys	HK	Homosexuals	2005-10-17	2005-10-16	2005-10-01	2005	71	382, 386	2	Majority of youngsters accept homosexuals	1
YD2005-103	News	HIV Education and Awareness	Mainland	General Public	2005-10-17	2005-10-16	2005-10-01	2005	89	381	1	不足41%黨官了解愛滋病	2.2
YD2005-101	News	Events	Overseas	PLHIV	2005-10-19	2005-10-16	2005-10-01	2005	88	375	1	愛滋病藥廠提供回佣罰55億	1
YD2005-102	News	HIV Transmission and Risks	Mainland	General Public	2005-10-19	2005-10-16	2005-10-01	2005	86	377	1	共用針筒北上濫藥惡化	1
YD2005-099	News	HIV Transmission and Risks	Mainland	General Public	2005-10-20	2005-10-16	2005-10-01	2005	86	373	1	共用針筒北上濫藥惡化	1
YD2005-100	News	Events	Overseas	MSM	2005-10-20	2005-10-16	2005-10-01	2005	87	374	1	丈夫與同志結婚	1
YD2005-098	News	HIV Surveillance	Overseas	PLHIV	2005-10-23	2005-10-23	2005-10-01	2005	85	360	1	愛滋患者五年後達千萬	1
YD2005-122	News	HIV Transmission and Risks	HK	PLHIV	2005-10-23	2005-10-23	2005-10-01	2005	104	481	1	何大一稱愛滋病毒變種快速	1
YD2005-123	News	HIV Transmission and Risks	Mainland	PLHIV	2005-10-23	2005-10-23	2005-10-01	2005	105	482	1	Children was infected with HIV from his father in Yunnan	1
YD2005-124	News	Events	HK	Celebrity	2005-10-23	2005-10-23	2005-10-01	2005	106	480,483, 485,486, 491	5	專程來港宣傳預防愛滋病的中國NBA 球星姚明, 还有其他明星献唱	1
YD2005-125	News	Others-article about MSM	HK	MSM	2005-10-23	2005-10-23	2005-10-01	2005	107	490	1	controversial topic of anal sex	1
LPK2005-072	News	Social Issues	HK	Homosexuals	2005-10-24	2005-10-23	2005-10-01	2005	67	351, 353	2	Homosexuals think that government's consultation involved discrimination	1
LPK2005-073	News	Social Issues	Overseas	Homosexuals	2005-10-24	2005-10-23	2005-10-01	2005	68	352	1	An American angry with the homosexual content of the textbook	1
LPK2005-074	Editorial	Social Issues	HK	General public	2005-10-24	2005-10-23	2005-10-01	2005	69	359	1	Editor disagree with establishing SODO	1
LPK2005-071	News	HIV Science	Overseas	General public	2005-10-25	2005-10-23	2005-10-01	2005	66	350	1	Breast milk may stop the activity of HIV	2.2
LPK2005-069	News	HIV Prevention		General public	2005-10-26	2005-10-23	2005-10-01	2005	64	342	1	Disinfectant gel helps preventing AIDS	1
LPK2005-070	News	Events	HK	General public	2005-10-26	2005-10-23	2005-10-01	2005	65	343	1	Events related to AIDS	1
YD2005-090	News	Sex-related crime	HK	MSM	2005-10-26	2005-10-23	2005-10-01	2005	77	332	1	色慾陷阱 勒索男同志	1
YD2005-094	News	Events	Mainland	Homosexuals	2005-10-26	2005-10-23	2005-10-01	2005	81	336	1	河南推首份愛滋保險	1
YD2005-096	News	Events	HK	General Public	2005-10-26	2005-10-23	2005-10-01	2005	83	341	1	Children attended AIDS prevention activities	1
YD2005-121	News	Others-article about MSM	HK	MSM	2005-10-26	2005-10-23	2005-10-01	2005	103	468	1	中國古代也有「同性戀」，這個說法似是而非	1
LPK2005-065	News	Other Statistics	Overseas	PLHIV	2005-10-26	2005-10-23	2005-10-01	2005	60	333	1	Number of AIDS orphans reachs 18 millions in 2010	2.2
LPK2005-067	News	Celebrities	Overseas	PLHIV	2005-10-26	2005-10-23	2005-10-01	2005	62	335	1	A football coach saved AIDS kids	2.2
YD2005-092	News	HIV Science	Overseas	General Public	2005-10-26	2005-10-23	2005-10-01	2005	79	334	1	割包皮降低60% 感染愛滋病風險	2.2
YD2005-095	News	Events	Mainland	Celebrity	2005-10-26	2005-10-23	2005-10-01	2005	82	337, 338, 340	3	李玟愛護兒童關懷愛滋	2.2
LPK2005-064	News	HIV Transmission or Risk	HK	General public	2005-10-29	2005-10-23	2005-10-01	2005	59	324, 325	2	People using suspected syringe to attack others	2.2
YD2005-088	News	Events	Mainland	General Public	2005-10-29	2005-10-23	2005-10-01	2005	75	323	1	反愛滋病歧視 幹部帶頭受訓	2.2
LPK2005-062	News	Social Issues	Overseas	Homosexuals	2005-10-31	2005-10-30	2005-10-01	2005	57	314	1	The Football Association penalizes the football players and fans who discriminate homosexuals	1
LPK2005-061	News	HIV Science	HK	General public	2005-11-01	2005-10-30	2005-11-01	2005	56	308	1	Knowledge about AIDS	1
YD2005-086	News	Events	Overseas	MSM	2005-11-01	2005-10-30	2005-11-01	2005	73	311	1	高倉健出入神秘同志Club	1
LPK2005-060	News	Social Issues	Mainland China	PLHIV	2005-11-01	2005-10-30	2005-11-01	2005	55	307, 309, 310, 312	4	Professors in mainland and Hong Kong made contribution in stopping widespread of AIDS	2.2
YD2005-084	News	Events	Overseas	Celebrity	2005-11-05	2005-10-30	2005-11-01	2005	71	297	1	Alicia Keys helps patients in developing countries	1
LPK2005-058	Editorial	Social Issues	HK	Homosexuals	2005-11-09	2005-11-06	2005-11-01	2005	53	277	1	Editor supports homosexuality	1
YD2005-082	News	Events	HK	MSM	2005-11-09	2005-11-06	2005-11-01	2005	69	277	1	一對孿生兄弟，一個是教會幹事，一個是同志團體中堅，二人從衝突到包容，實踐宗教和同性戀之間，原來可以互相包容	1
LPK2005-059	News	Social Issues	Mainland China	PLHIV	2005-11-09	2005-11-06	2005-11-01	2005	54	278	1	Chinese hospitals exploit AIDS patients	2.2
LPK2005-057	News	HIV Transmission or Risk	Overseas	PLHIV	2005-11-11	2005-11-06	2005-11-01	2005	52	271	1	AIDS men conceal their health problem from blood donation centre	2.2
YD2005-080	News	Events	Overseas	Homosexuals	2005-11-13	2005-11-13	2005-11-01	2005	67	264	1	同志雜誌選最有影響力100人	1
LPK2005-056	News	Social Issues	Mainland China	PLHIV	2005-11-13	2005-11-13	2005-11-01	2005	51	263	1	Half of the AIDS patients in Heilongjiang refuse the treatment	2.2
LPK2005-054	News	Social Issues	HK	General public	2005-11-14	2005-11-13	2005-11-01	2005	49	253	1	70% of youngsters have unsafe sex	1
LPK2005-053	News	HIV Treatment	Overseas	PLHIV	2005-11-14	2005-11-13	2005-11-01	2005	48	249-252, 255, 259	6	An AIDS patient fully recovered by intake of vitamins only	2.2
LPK2005-055	News	HIV Science	Overseas	General public	2005-11-14	2005-11-13	2005-11-01	2005	50	256	1	Scientists try to develop new method for HIV prevention	2.2
YD2005-077	News	HIV Surveillance	Overseas	PLHIV	2005-11-14	2005-11-13	2005-11-01	2005	59	254	1	全球帶菌者4000萬	2.2
LPK2005-050	News	Social Issues	Overseas	Homosexuals	2005-11-15	2005-11-13	2005-11-01	2005	46	243	1	Basketball players discriminate homosexuals	1
LPK2005-051	News	HIV testing	Overseas	General public	2005-11-15	2005-11-13	2005-11-01	2005	47	244	1	New HIV test kit	2.2
LPK2005-052	News	HIV Treatment	Overseas	PLHIV	2005-11-15	2005-11-13	2005-11-01	2005	48	245	1	An AIDS patient fully recovered by intake of vitamins only	2.2
LPK2005-049	News	Surveillance	HK	PLHIV	2005-11-17	2005-11-13	2005-11-01	2005	45	230-232	3	91 HIV infection cases in third quarter	2.2
YD2005-072	News	HIV Science	Overseas	PLHIV	2005-11-18	2005-11-13	2005-11-01	2005	61	224	1	愛滋患者染禽流感恐人傳人	1
LPK2005-048	News	Surveillance	Taiwan	PLHIV	2005-11-19	2005-11-13	2005-11-01	2005	44	217	1	Number of female(youngsters) with AIDS in Taiwan increases	2.2
LPK2005-024	News	Surveillance	Overseas	General public	2005-11-22	2005-11-20	2005-11-01	2005	23	210-212	3	Number of AIDS cases increased by 5 millions and reached 40 millions	2.2
LPK2005-047	Editorial	Social Issues	HK	Homosexuals	2005-11-23	2005-11-20	2005-11-01	2005	43	208	1	Editor appeal for anti-discrimination of homosexuality	1
YD2005-069	News	Sex-related crime	HK	MSM	2005-11-24	2005-11-20	2005-11-01	2005	58	206	1	約會網上同志偷勞力士表典當	1
YD2005-067	News	Policy and Law	Overseas	MSM	2005-11-24	2005-11-20	2005-11-01	2005	48	203	1	梵蒂岡禁同性戀者當神父	2.2
YD2005-068	News	HIV Treatment	Overseas	PLHIV	2005-11-24	2005-11-20	2005-11-01	2005	57	204	1	藥物專利令貧病者無得救	2.2
YD2005-065	News	Events	HK	Celebrity	2005-11-25	2005-11-20	2005-11-01	2005	55	198	1	Benetton義賣Tee捐助愛滋	1
YD2005-066	News	Events	Overseas	MSM	2005-11-25	2005-11-20	2005-11-01	2005	56	202	1	巴西天主教會爆出孌童醜聞	1
LPK2005-037	News	Policy and Laws	Overseas	0	2005-11-25	2005-11-20	2005-11-01	2005	34	197	1	Homosexuals cannot to be priests	2.2
YD2005-063	News	Events	Overseas	MSM	2005-11-26	2005-11-20	2005-11-01	2005	53	194	1	Gays delcared their marriage date	1
YD2005-062	News	Events	Overseas	MSM	2005-11-28	2005-11-27	2005-11-01	2005	52	192	1	Gays delcared their marriage date	1
LPK2005-043	Editorial	HIV Education and Awareness	HK	PLHIV	2005-11-29	2005-11-27	2005-11-01	2005	39	188	1	Editor appeal for concerning with AIDS patients	1
LPK2005-045	News	Surveillance	Mainland China	PLHIV	2005-11-29	2005-11-27	2005-11-01	2005	41	190	1	Mainland AIDS patients increased by 30%	1
YD2005-059	News	Events	HK	PLHIV	2005-11-29	2005-11-27	2005-11-01	2005	1	187	1	Two men from Vietnam committed robbery in order to get into prison and get treatment of AIDS	1
YD2005-060	News	Events	HK	General Public	2005-11-29	2005-11-27	2005-11-01	2005	42	188	1	Activities in World AIDS Day	1
LPK2005-042	News	HIV Education and Awareness	Overseas	Celebrity	2005-11-29	2005-11-27	2005-11-01	2005	38	186	1	Advertisment of David Beckham and Robbie Williams aims at awaken the public awareness of AIDS	2.2
LPK2005-044	News	HIV testing	Overseas	General public	2005-11-29	2005-11-27	2005-11-01	2005	40	189	1	HIV testing of Lesotho citizens	2.2
LPK2005-039	News	Events	Overseas	PLHIV	2005-11-30	2005-11-27	2005-11-01	2005	35	179	1	Beauty pageant for AIDS patients	1
LPK2005-041	News	Surveillance	Mainland China	PLHIV	2005-11-30	2005-11-27	2005-11-01	2005	37	181	1	Chinese government announces that number of AIDS patients reachs 130 thousands	2.2
YD2005-055	News	Policy and Law	Overseas	MSM	2005-11-30	2005-11-27	2005-11-01	2005	48	178, 182	2	梵蒂岡禁同性戀者當神父	2.2
YD2005-056	News	Events	Overseas	PLHIV	2005-11-30	2005-11-27	2005-11-01	2005	42	179 ,180	2	Activities in World AIDS Day	2.2
LPK2005-030	Editorial	Social Issues	Overseas	PLHIV	2005-12-01	2005-11-27	2005-12-01	2005	28	160	1	Cases of AIDS	1
LPK2005-032	News	Events	HK	General public	2005-12-01	2005-11-27	2005-12-01	2005	30	162	1	Appeal for anti-discrimination of AIDS patients	1
LPK2005-034	Press Release	Others	Overseas	PLHIV	2005-12-01	2005-11-27	2005-12-01	2005	32	170	1	World Vision appeal for money donation	1
LPK2005-035	News	Social Issues		PLHIV	2005-12-01	2005-11-27	2005-12-01	2005	33	176	1	AIDS patients have survival problem	1
YD2005-052	News	HIV Transmission and Risks	Mainland	PLHIV	2005-12-01	2005-11-27	2005-12-01	2005	46	165	1	AIDS patient change his wife and doctors used blood with HIV result in more people infected with HIV	1
YD2005-053	News	HIV Surveillance	Mainland	PLHIV	2005-12-01	2005-11-27	2005-12-01	2005	47	167	1	People were infected with HIV through blood transfusion	1
YD2005-054	News	Events	Overseas	PLHIV	2005-12-01	2005-11-27	2005-12-01	2005	42	168, 170	2	Activities in World AIDS Day	1
LPK2005-031	News	HIV Transmission or Risk	Mainland China	PLHIV	2005-12-01	2005-11-27	2005-12-01	2005	29	161, 164	1	Control the number of AIDS patients within 1.5 millions	2.2
LPK2005-033	News	Surveillance	Mainland China	PLHIV	2005-12-01	2005-11-27	2005-12-01	2005	31	163	1	Number of AIDS patients in China may reach 10 millions in 2010	2.2
YD2005-049	News	Events	Overseas	PLHIV	2005-12-01	2005-11-27	2005-12-01	2005	43	158159162, 171	4	愛滋病遺孤的悲劇	2.2
YD2005-045	News	Social Issue	Mainland	PLHIV	2005-12-02	2005-11-27	2005-12-01	2005	38	148, 150	1	愛滋村貪官	1
LPK2005-022	News	Surveillance	Mainland China	PLHIV	2005-12-02	2005-11-27	2005-12-01	2005	22	146	1	70% of AIDS patients hidden in the society of Shenzhen	2.2
LPK2005-023	News	Surveillance	Overseas	General public	2005-12-02	2005-11-27	2005-12-01	2005	23	147	1	Number of AIDS cases reached 40 millions and United Nations appeal for safe sex	2.2
LPK2005-026	News	Others	Overseas	Homosexuals	2005-12-02	2005-11-27	2005-12-01	2005	24	149	1	New shopping area for homosexual people	2.2
LPK2005-027	News	HIV Science	Overseas	General public	2005-12-02	2005-11-27	2005-12-01	2005	25	150	1	Progression made on vaccine development	2.2
LPK2005-028	News	Events	HK	General public	2005-12-02	2005-11-27	2005-12-01	2005	26	152	1	Events related to AIDS	2.2
LPK2005-021	News	HIV Transmission or Risk	Mainland China	PLHIV	2005-12-03	2005-11-27	2005-12-01	2005	21	144, 145	2	AIDS patient smears his blood on a child's mouth	2.2
YD2005-040	News	Social Issues	Mainland	PLHIV	2005-12-04	2005-12-04	2005-12-01	2005	33	137-138	1	愛滋漢賣血15次連累21人感染	2.2
YD2005-041	News	Events	HK	Celebrity	2005-12-04	2005-12-04	2005-12-01	2005	34	139	1	張衛健激情過後染愛滋病	2.2
LPK2005-018	News	Social Issues	Overseas	General public	2005-12-05	2005-12-04	2005-12-01	2005	18	135	1	Workers suffer from AIDS due to blood donation and seek for compensation	2.2
YD2005-038	News	Events	HK	MSM	2005-12-06	2005-12-04	2005-12-01	2005	31	130	1	雞姦案被告貪玩自稱同志	1
LPK2005-017	News	Policy and Laws	Overseas	Homosexuals	2005-12-06	2005-12-04	2005-12-01	2005	17	129, 132	2	UK legalizes same-sex marriage	2.2
LPK2005-016	News	Sex-related crime	Overseas	MSM	2005-12-07	2005-12-04	2005-12-01	2005	16	126	1	MSM commits sex-related crime	1
YD2005-036	News	Events	Overseas	MSM	2005-12-07	2005-12-04	2005-12-01	2005	30	127128	1	艾頓莊溫莎大會堂行禮	1
YD2005-035	News	Social Issue	Overseas	MSM	2005-12-08	2005-12-04	2005-12-01	2005	29	121	1	Robbie打贏同性戀誹謗官司	1
YD2005-033	News	HIV Surveillance	Overseas	PLHIV	2005-12-08	2005-12-04	2005-12-01	2005	27	118	1	愛滋蔓延與性自由化	2.2
YD2005-034	News	Events	HK	MSM	2005-12-08	2005-12-04	2005-12-01	2005	28	119, 122, 123	3	30歲任職餐酒售貨員的男同志昨在高院承認一項與21歲以下男子進行同性肛交罪名和兩項猥褻侵犯罪	2.2
YD2005-032	News	Sex-related crime	HK	MSM	2005-12-09	2005-12-04	2005-12-01	2005	26	115	1	司機涉兩度雞姦男童脫罪	1
YD2005-031	News	Events	Overseas	MSM	2005-12-10	2005-12-04	2005-12-01	2005	25	114	1	孌童教主	1
YD2005-029	News	Events	Taiwan	MSM	2005-12-11	2005-12-11	2005-12-01	2005	23	107	1	台男同志人權日諧連理	1
YD2005-030	News	Events	HK	MSM	2005-12-11	2005-12-11	2005-12-01	2005	24	111	1	Story of MSM	1
LPK2005-013	News	HIV Transmission or Risk	HK	General public	2005-12-11	2005-12-11	2005-12-01	2005	13	106	1	People using suspected syringe to attack others	2.2
LPK2005-012	Editorial	Events	HK	General public	2005-12-12	2005-12-11	2005-12-01	2005	12	103	1	Events related to AIDS	2.2
YD2005-026	News	Sex-related crime	HK	MSM	2005-12-13	2005-12-11	2005-12-01	2005	16	95,96	2	Two men have anal sex broken the law	1
LPK2005-011	News	Events	Overseas	PLHIV	2005-12-15	2005-12-11	2005-12-01	2005	11	84	1	Events held by Unicef for AIDS orphans	1
YD2005-025	Movies	Others-MSM realted movies	Overseas	MSM	2005-12-15	2005-12-11	2005-12-01	2005	9	87	1	MSM related movie 李安的電影《斷背山》	1
YD2005-022	News	Social Issue	Mainland	PLHIV	2005-12-15	2005-12-11	2005-12-01	2005	18	76,77,78,80	4	The negative effect on two AIDS patients' families aftering seeing Jintao Hu	2.2
YD2005-023	News	Events	Mainland	Homosexuals	2005-12-15	2005-12-11	2005-12-01	2005	19	79,83	2	北京首屆同性戀文化節名人出席	2.2
YD2005-024	News	Surveys	Mainland	PLHIV	2005-12-15	2005-12-11	2005-12-01	2005	20	81	1	愛滋蔓延全國廣東嚴重	2.2
YD2005-021	News	Events	Overseas	PLHIV	2005-12-16	2005-12-11	2005-12-01	2005	17	72	1	姬蒂舊愛惹毒禍疑染愛滋	1
YD2005-019	News	Sex-related crime	HK	MSM	2005-12-17	2005-12-11	2005-12-01	2005	16	65,66	1	Two men have anal sex broken the law	1
YD2005-020	Movies	Others-MSM realted movies	Overseas	MSM	2005-12-17	2005-12-11	2005-12-01	2005	9	67	1	MSM related movie 李安的電影《斷背山》	1
YD2005-018	News	Events	Mainland	PLHIV	2005-12-17	2005-12-11	2005-12-01	2005	15	64	1	胡錦濤探病	2.2
YD2005-017	News	Surveys	Overseas	PLHIV	2005-12-18	2005-12-18	2005-12-01	2005	14	63	1	泰國每小時三人染愛滋	1
YD2005-016	News	Events	Overseas	Celebrity	2005-12-19	2005-12-18	2005-12-01	2005	13	59	1	艾頓莊婚宴捐錢代送禮	1
YD2005-015	News	Events	Overseas	Homosexuals	2005-12-20	2005-12-18	2005-12-01	2005	12	54	1	「環保國」與「同性戀國」	1
YD2005-011	News	Policy and Law	Overseas	MSM	2005-12-21	2005-12-18	2005-12-01	2005	8	43,52	2	One celebrity's legal homosexual marriage in England	1
YD2005-012	News	Policy and Law	Overseas	Homosexuals	2005-12-21	2005-12-18	2005-12-01	2005	10	44	1	英同性婚姻法今生效	1
YD2005-013	Movies	Others-MSM realted movies	Overseas	MSM	2005-12-21	2005-12-18	2005-12-01	2005	9	47	1	尼敦連公然嘲諷《斷背山》	1
YD2005-014	News	Events	Overseas	MSM	2005-12-21	2005-12-18	2005-12-01	2005	11	51	1	The second legal homosexual marriage in England	1
LPK2005-006	Editorial	Social Issues	Overseas	MSM	2005-12-22	2005-12-18	2005-12-01	2005	6	39	1	MSM football players are being discriminated	1
YD2005-009	Movies	Others-MSM realted movies	Overseas	MSM	2005-12-22	2005-12-18	2005-12-01	2005	9	39	1	MSM related movie 李安的電影《斷背山》	1
YD2005-010	News	Policy and Law	Overseas	MSM	2005-12-22	2005-12-18	2005-12-01	2005	8	41	1	One celebrity's legal homosexual marriage in England	1
YD2005-006	News	Events	Overseas	PLHIV	2005-12-23	2005-12-18	2005-12-01	2005	6	34	1	志願奶媽哺育棄嬰	1
YD2005-008	News	Policy and Law	Overseas	MSM	2005-12-23	2005-12-18	2005-12-01	2005	8	37	1	One celebrity's legal homosexual marriage in England	1
LPK2005-005	News	HIV Transmission or Risk	Mainland China	General public	2005-12-23	2005-12-18	2005-12-01	2005	5	35	1	A rumour about AIDS patient in China using syringe with HIV to attack others	2.2
LPK2005-004	News	Surveys	HK	General public	2005-12-24	2005-12-18	2005-12-01	2005	4	31	1	Festival mood induces unsafe sex and may increase the probability of suffering from AIDS or other sexually-transmitted diseases	1
YD2005-005	News	Social Issue	Overseas	MSM	2005-12-24	2005-12-18	2005-12-01	2005	5	26	1	HG遭「狂插」教壞細路	1
YD2005-004	News	Events	Overseas	MSM	2005-12-25	2005-12-25	2005-12-01	2005	4	23	1	男生被同學指為同性戀， 上诉得到赔偿	1
YD2005-003	News	HIV Transmission or Risk	Overseas	PLHIV	2005-12-26	2005-12-25	2005-12-01	2005	3	22	1	輸愛滋血判死 六醫護重審	1
LPK2005-003	Editorial	Social Issues	HK	MSM	2005-12-28	2005-12-25	2005-12-01	2005	3	12	1	Editor object to MSM	2.2
LPK2005-001	News	Social Issues	Mainland China	Homosexuals	2005-12-30	2005-12-25	2005-12-01	2005	1	5	1	Online wedding of homosexual people is controversial	1
LPK2005-002	News	HIV Transmission or Risk	Overseas	General public	2005-12-30	2005-12-25	2005-12-01	2005	2	9	1	Thailand now has very high rate of HIV infection	1
YD2005-001	News	Social Issue	HK	PLHIV	2005-12-30	2005-12-25	2005-12-01	2005	1	4,6	2	Two men from Vietnam committed robbery in order to get into prison and get treatment of AIDS	1
YD2006-397	Movies	Others-MSM related movie	Overseas	MSM	2006-01-01	2006-01-01	2006-01-01	2006	212	1612	1	《斷背山》review	2.2
SYT2006-271	News	HIV Treatment	HK	PLHIV	2006-01-02	2006-01-01	2006-01-01	2006	193	1600	1	New HIV treatment method	1
SYT2006-255	News	Event	Overseas	MSM	2006-01-06	2006-01-01	2006-01-01	2006	177	1595	1	MSM carnival in Thailand	2.2
SYT2006-270	News	Surveys	HK	General public-Pneumonia patients	2006-01-06	2006-01-01	2006-01-01	2006	192	1592	1	33% Pneumonia patients are HIV positive	2.2
SYT2006-269	News	HIV Surveillance	Mainland China	PLHIV	2006-01-07	2006-01-01	2006-01-01	2006	191	1590	1	HIV peak period in teenagers	2.2
SYT2006-268	News	HIV prevention	Overseas	General public	2006-01-09	2006-01-08	2006-01-01	2006	190	1584	1	HIV prevention in Southeast Asia	2.2
YD2006-393	Movies	Others-AIDS related movies	Overseas	Celebrity	2006-01-09	2006-01-08	2006-01-01	2006	221	1585	1	《你是我的命運》AIDS related movie	1
YD2006-391	News	Events	Overseas	PLHIV	2006-01-10	2006-01-08	2006-01-01	2006	311	1582	1	阿蓋達擬以愛滋人彈施襲	1
YD2006-390	Movies	Others-MSM related movie	Overseas	MSM	2006-01-11	2006-01-08	2006-01-01	2006	212	1578-1579, 1581	3	《斷背山》	2.2
YD2006-388	News	Events	Overseas	Homosexuals	2006-01-15	2006-01-15	2006-01-01	2006	309	1571	1	Homosexual Unions	1
YD2006-389	News	Events	Overseas	MSM	2006-01-15	2006-01-15	2006-01-01	2006	310	1577	1	第63屈金球獎典禮之男主角篇 攣攣牛仔VS同志作家影帝露玄基	1
YD2006-387	News	Events	HK	PLHIV	2006-01-16	2006-01-15	2006-01-01	2006	308	1569	1	浸大生年宵義賣工藝品 to help AIDS patients	1
YD2006-386	Movies	Others-MSM related movie	Overseas	MSM	2006-01-18	2006-01-15	2006-01-01	2006	212	1561, 1562, 1563	3	《斷背山》	2.2
SYT2006-266	News	HIV transmission or risk	Mainland China	General public	2006-01-19	2006-01-15	2006-01-01	2006	188	1553	1	HIV transmission via blood transfusion	2.2
SYT2006-267	News	Surveys	Mainland China	MSM	2006-01-19	2006-01-15	2006-01-01	2006	189	1554	1	MSM current situation	2.2
YD2006-381	News	Events	Mainland	PLHIV	2006-01-20	2006-01-15	2006-01-01	2006	304	1545	1	AIDS patients in He'nan	1
SYT2006-265	News	HIV transmission or risk	Mainland China	PLHIV	2006-01-20	2006-01-15	2006-01-01	2006	187	1543,1544	2	Henan HIV villages current situation	2.2
YD2006-382	News	Others-MSM related movie	HK	MSM	2006-01-20	2006-01-15	2006-01-01	2006	305	1546	1	《心猿意馬》MSM related movie	1
YD2006-383	Movies	Others-MSM related movie	Mainland	MSM	2006-01-20	2006-01-15	2006-01-01	2006	212	1550	1	《斷背山》	2.2
YD2006-378	Movies	Others-MSM related movie	HK	MSM	2006-01-23	2006-01-22	2006-01-01	2006	301	1535	1	《斷背山》MSM related movie	2.2
SYT2006-264	News	Event	Overseas	Homosexuals	2006-01-25	2006-01-22	2006-01-01	2006	186	1530	1	Homosexuals large-scale parade	1
YD2006-374	News	Events	HK	MSM	2006-01-25	2006-01-22	2006-01-01	2006	298	1520, 1525, 1526	3	兩探扮同志搗破北鵝基地	2.2
SYT2006-261	News	HIV prevention	HK	General public	2006-01-25	2006-01-22	2006-01-01	2006	183	1521	1	AIDS concern volunteer promoting HIV prevention	2.2
YD2006-376	News	HIV Treatment	Mainland	PLHIV	2006-01-25	2006-01-22	2006-01-01	2006	300	1522	1	中醫藥療愛滋病	2.2
YD2006-377	Movies	Others-MSM related movie	HK	MSM	2006-01-25	2006-01-22	2006-01-01	2006	212	1523, 1524, 1531	3	《斷背山》MSM related movie	2.2
YD2006-373	News	HIV Surveillance	Mainland	PLHIV	2006-01-26	2006-01-22	2006-01-01	2006	297	1515, 1517	2	中國愛滋病患者達65萬	2.2
SYT2006-259	News	Events	Overseas	Celebrity	2006-01-28	2006-01-22	2006-01-01	2006	181	1506,1509	2	Celebrity(Bono) donating to HIV fund	2.2
YD2006-371	Movies	Others-MSM related movie	Mainland	MSM	2006-01-28	2006-01-22	2006-01-01	2006	212	1508	1	《斷背山》	2.2
YD2006-370	News	Events	Overseas	Celebrity	2006-01-29	2006-01-29	2006-01-01	2006	296	1505	1	Bono推品牌 收益助抗愛滋	1
YD2006-369	Movies	Others-MSM related movie	Mainland	MSM	2006-01-29	2006-01-29	2006-01-01	2006	212	1503, 1505	2	《斷背山》	2.2
YD2006-367	Movies	Others-MSM related movie	HK	MSM	2006-02-01	2006-01-29	2006-02-01	2006	212	1497, 1501	2	《斷背山》MSM related movie	2.2
SYT2006-258	News	HIV Treatment	Overseas	Others-monkey	2006-02-08	2006-02-05	2006-02-01	2006	180	1482	1	HIV treatment method are successful in monkey	1
YD2006-366	Movies	Others-MSM related movie	HK	MSM	2006-02-09	2006-02-05	2006-02-01	2006	212	1480-1481	2	《斷背山》MSM related movie	2.2
SYT2006-257	News	Social Issues	Overseas	General public-university students	2006-02-09	2006-02-05	2006-02-01	2006	179	1478	1	University opening subjects related homosexuals	2.2
YD2006-364	Movies	Others-MSM related movie	HK	MSM	2006-02-11	2006-02-05	2006-02-01	2006	212	1472	1	《斷背山》MSM related movie	2.2
YD2006-361	News	Events	Overseas	PLHIV	2006-02-12	2006-02-12	2006-02-01	2006	293	1464	1	Erasure主音Andy Bell與愛滋病搏鬥了六年	1
SYT2006-256	News	HIV Science	HK	General public-female	2006-02-12	2006-02-12	2006-02-01	2006	178	1466,1467	2	Female are more likely to infected HIV	2.2
YD2006-363	Movies	Others-MSM related movie	HK	MSM	2006-02-12	2006-02-12	2006-02-01	2006	212	1468, 1469	2	《斷背山》MSM related movie	2.2
YD2006-360	News	Events	Overseas	MSM	2006-02-13	2006-02-12	2006-02-01	2006	287	1458	1	小報爆英超「萬能插蘇」 球星演真人版斷背「3」	1
YD2006-359	News	Events	Overseas	Homosexuals	2006-02-13	2006-02-12	2006-02-01	2006	292	1455	1	布吉同志嘉年華	2.2
SYT2006-248	News	Policy and Laws	Mainland China	General public	2006-02-13	2006-02-12	2006-02-01	2006	171	1454,1456,1457,1463	4	《愛滋病防治條例》	2.2
SYT2006-247	News	Policy and Laws	Mainland China	General public	2006-02-14	2006-02-12	2006-02-01	2006	171	1452	1	《愛滋病防治條例》	2.2
SYT2006-233	News	Surveys	HK	General public	2006-02-14	2006-02-12	2006-02-01	2006	159	1451	1	Survey about citizens' attitude to set up anti-discrimination laws to homosexuals	2.2
YD2006-353	News	HIV Science	Overseas	PLHIV	2006-02-15	2006-02-12	2006-02-01	2006	289	1443	1	向日葵或可治療愛滋病	2.2
SYT2006-249	News	HIV transmission or risk	HK	MSM	2006-02-15	2006-02-12	2006-02-01	2006	172	1438	1	MSM group are infected HIV together	2.2
YD2006-355	News	HIV Treatment	Overseas	PLHIV	2006-02-15	2006-02-12	2006-02-01	2006	290	1450	1	人命試藥到人體試狗糧	1
YD2006-354	Movies	Others-MSM related movie	HK	MSM	2006-02-15	2006-02-12	2006-02-01	2006	212	1444	1	《斷背山》MSM related movie	2.2
SYT2006-246	News	Policy and Laws	Mainland China	General public	2006-02-15	2006-02-12	2006-02-01	2006	171	1436,1437	2	《愛滋病防治條例》	2.2
SYT2006-253	News	Social Issues	HK	Homosexuals	2006-02-15	2006-02-12	2006-02-01	2006	176	1445	1	Homosexuals doing social contact on Internet	1
SYT2006-250	News	Surveillance	HK	PLHIV	2006-02-15	2006-02-12	2006-02-01	2006	173	1439,1440,1442	3	HIV infected cases increasing 313 which is highest	2.2
YD2006-352	News	Surveys	Overseas	Homosexuals	2006-02-15	2006-02-12	2006-02-01	2006	288	1441	1	同性「婚姻」有助健康	2.2
SYT2006-245	News	Surveys	HK	General public-teenagers	2006-02-16	2006-02-12	2006-02-01	2006	170	1434	1	More teenagers accepting homosexuals	2.2
YD2006-346	News	HIV Surveillance	Mainland	PLHIV	2006-02-17	2006-02-12	2006-02-01	2006	283	1427, 1428	2	廣東愛滋感染者料逾4萬人	2.2
YD2006-347	Movies	Others-MSM related movie	HK	MSM	2006-02-17	2006-02-12	2006-02-01	2006	212	1429, 1432	2	《斷背山》MSM related movie	2.2
SYT2006-243	News	HIV Prevention	Mainland China	General public	2006-02-18	2006-02-12	2006-02-01	2006	168	1421	1	HIV prevention measures in Beijing	1
SYT2006-232	News	Surveys	HK	General public	2006-02-18	2006-02-12	2006-02-01	2006	159	1420	1	Survey about citizens' attitude to set up anti-discrimination laws to homosexuals	2.2
YD2006-344	Movies	Others-MSM related movie	HK	MSM	2006-02-19	2006-02-19	2006-02-01	2006	212	1419	1	《斷背山》MSM related movie	1
YD2006-343	Movies	Others-MSM related movie	HK	MSM	2006-02-21	2006-02-19	2006-02-01	2006	212	1408, 1409, 1411, 1413	4	《斷背山》MSM related movie	2.2
YD2006-342	Movies	Others-MSM related movie	HK	MSM	2006-02-22	2006-02-19	2006-02-01	2006	212	1405	1	《斷背山》MSM related movie review	2.2
YD2006-341	Movies	Others-MSM related movie	HK	MSM	2006-02-23	2006-02-19	2006-02-01	2006	212	1399,1400,1401	3	《斷背山》MSM related movie review	2.2
SYT2006-242	News	HIV transmission or risk	HK	MSM	2006-02-24	2006-02-19	2006-02-01	2006	167	1395	1	Gay's partner is HIV high risk group	1
YD2006-340	Movies	Others-MSM related movie	HK	MSM	2006-02-24	2006-02-19	2006-02-01	2006	212	1393	1	《斷背山》MSM related movie review	2.2
YD2006-339	Movies	Others-MSM related movie	HK	MSM	2006-02-25	2006-02-19	2006-02-01	2006	212	1391, 1392	2	《斷背山》MSM related movie review	2.2
YD2006-337	News	Events	Overseas	MSM	2006-02-26	2006-02-26	2006-02-01	2006	292	1382	1	7美軍被控拍同性性愛錄影帶	2.2
YD2006-338	Movies	Others-MSM related movie	HK	MSM	2006-02-26	2006-02-26	2006-02-01	2006	212	1383, 1384	2	《斷背山》MSM related movie review	2.2
YD2006-336	News	Events	Overseas	MSM	2006-02-27	2006-02-26	2006-02-01	2006	292	1380	1	7美軍被控拍同性性愛錄影帶	2.2
YD2006-335	Movies	Others-MSM related movie	HK	MSM	2006-02-27	2006-02-26	2006-02-01	2006	212	1376	1	《斷背山》MSM related movie review	1
YD2006-333	News	Events	Overseas	Celebrity	2006-02-28	2006-02-26	2006-02-01	2006	291	1369	1	孫燕姿非洲行善1000小時	2.2
YD2006-334	Movies	Others-MSM related movie	HK	MSM	2006-02-28	2006-02-26	2006-02-01	2006	212	1373, 1375	2	《斷背山》MSM related movie review	1
SYT2006-238	News	Sex-related crime	HK	MSM	2006-03-01	2006-02-26	2006-03-01	2006	164	1364,1365	2	MSM sex-related crime in toilet	2.2
SYT2006-237	News	Others-volunteers	Mainland China	PLHIV	2006-03-02	2006-02-26	2006-03-01	2006	163	1357	1	Volunteer(胡佳) engaged in HIV prevention is missing	1
SYT2006-125	Movies	Movies	Overseas	MSM	2006-03-03	2006-02-26	2006-03-01	2006	87	1348	1	Overseas MSM movie entitled "斷背山"	1
YD2006-331	Movies	Others-MSM related movie	HK	MSM	2006-03-03	2006-02-26	2006-03-01	2006	212	1358, 1359	1	《斷背山》MSM related movie review	1
YD2006-329	News	Policy and Law	HK	Homosexuals	2006-03-03	2006-02-26	2006-03-01	2006	288	1348	1	港府正研究是否批准 同志想去英領事館「結婚」	2.2
YD2006-330	News	Policy and Law	HK	Homosexuals	2006-03-03	2006-02-26	2006-03-01	2006	289	1351	1	「同性婚姻」	2.2
YD2006-327	News	Events	Overseas	MSM	2006-03-04	2006-02-26	2006-03-01	2006	287	1345	1	「斷背3」報道侵犯「假私隱」 A高爾控兩報誹謗	1
YD2006-328	Movies	Others-MSM related movie	Overseas	MSM	2006-03-04	2006-02-26	2006-03-01	2006	212	1346-1347	2	《斷背山》MSM related movie	2.2
SYT2006-234	News	Policy and Laws	Overseas	MSM	2006-03-04	2006-02-26	2006-03-01	2006	160	1343	1	Police rejecting to rescue gay patients	2.2
SYT2006-231	News	Surveys	HK	General public	2006-03-04	2006-02-26	2006-03-01	2006	159	1342	1	Survey about citizens' attitude to homosexuals	2.2
SYT2006-235	News	Surveys	Mainland China	MSM	2006-03-04	2006-02-26	2006-03-01	2006	161	1344	1	Survey about citizens' attitude to MSM	2.2
YD2006-322	Movies	Others-MSM related movie	HK	MSM	2006-03-05	2006-03-05	2006-03-01	2006	212	1328, 1333, 1335, 1336	4	《斷背山》MSM related movie review	2.2
SYT2006-229	News	Policy and Laws	Mainland China	General public	2006-03-05	2006-03-05	2006-03-01	2006	157	1330	1	《艾滋病防治條例》	1
YD2006-321	News	Surveys	HK	Homosexuals	2006-03-05	2006-03-05	2006-03-01	2006	282	1327	1	The results of one survey about acceptance of homosexuals in HK	2.2
YD2006-323	News	Surveys	HK	MSM	2006-03-05	2006-03-05	2006-03-01	2006	283	1331	1	香港有30萬男同志	2.2
SYT2006-163	Movies	Movies	Overseas	MSM	2006-03-06	2006-03-05	2006-03-01	2006	104	1322	1	Korean MSM movie entitled "王的男人"	1
YD2006-320	Movies	Others-MSM related movie	HK	MSM	2006-03-06	2006-03-05	2006-03-01	2006	212	1314, 1315, 1319, 1320, 1324	5	《斷背山》MSM related movie review	2.2
YD2006-319	News	Policy and Law	Overseas	MSM	2006-03-06	2006-03-05	2006-03-01	2006	274	1313, 1316, 1318	3	匯豐炒「斷背」僱員遭索償	2.2
SYT2006-227	Editorial	Social Issues	HK	MSM	2006-03-06	2006-03-05	2006-03-01	2006	155	1324	1	Supporting MSM	1
YD2006-317	News	Events	Overseas	MSM	2006-03-07	2006-03-05	2006-03-01	2006	277	1305	1	李安得獎謝摘要	1
YD2006-318	News	Events	Overseas	MSM	2006-03-07	2006-03-05	2006-03-01	2006	281	1306	1	Gay writer and his books	1
SYT2006-226	News	HIV transmission or risk	Overseas	General public-Hemophilia patients	2006-03-07	2006-03-05	2006-03-01	2006	154	1295,1303	2	Donated blood of prisoner transmitting HIV to Hemophilia patients	2.2
SYT2006-121	Movies	Movies	HK	MSM	2006-03-07	2006-03-05	2006-03-01	2006	87	1292-1294,1298-1302,1304,1305,1307,1311,1312	13	Overseas MSM movie entitled "斷背山"	2.2
YD2006-316	Movies	Others-MSM related movie	Taiwan	MSM	2006-03-07	2006-03-05	2006-03-01	2006	280	1296	1	Taiwan ecstatic over native son Ang Lee's Oscar triumph	1
YD2006-312	News	Events	Overseas	PLHIV	2006-03-08	2006-03-05	2006-03-01	2006	278	1276	1	南非前副總統被控姦愛滋女	1
YD2006-313	Movies	Others-MSM related movie	HK	MSM	2006-03-08	2006-03-05	2006-03-01	2006	212	1274, 1277, 1291	3	《斷背山》MSM related movie review	2.2
SYT2006-119	Movies	Movies	Overseas	MSM	2006-03-09	2006-03-05	2006-03-01	2006	87	1264-1266,1269,1271	5	Overseas MSM movie entitled "斷背山"	2.2
YD2006-306	News	Policy and Law	HK	MSM	2006-03-09	2006-03-05	2006-03-01	2006	272	1264	1	The support and acceptence of MSM in HK	1
SYT2006-223	News	Policy and Laws	HK	MSM	2006-03-09	2006-03-05	2006-03-01	2006	152	1267,1268,1270	3	HSBC homosexuals discrimination law case	2.2
SYT2006-222	News	Social Issues	Mainland China	PLHIV	2006-03-09	2006-03-05	2006-03-01	2006	151	1261	1	HIV patients are not satisfied with government's allowance	2.2
SYT2006-225	News	Surveys	Overseas	MSM	2006-03-09	2006-03-05	2006-03-01	2006	153	1273	1	4% female married with gays	1
YD2006-307	News	Surveys	Overseas	MSM	2006-03-09	2006-03-05	2006-03-01	2006	273	1266, 1273	2	美300萬丈夫情陷斷背	1
YD2006-302	News	Events	Overseas	Homosexuals	2006-03-10	2006-03-05	2006-03-01	2006	270	1248	1	悉尼的同性戀嘉年華	2.2
SYT2006-118	Movies	Others-MSM related movie	HK	MSM	2006-03-10	2006-03-05	2006-03-01	2006	87	1249,1250-1252,1260	5	Overseas MSM movie entitled "斷背山"	2.2
SYT2006-220	News	HIV prevention	Overseas	General public-female	2006-03-11	2006-03-05	2006-03-01	2006	149	1237	1	HIV prevention measures in Africa	2.2
YD2006-301	Movies	Others-MSM related movie	HK	MSM	2006-03-11	2006-03-05	2006-03-01	2006	212	1242	1	《斷背山》MSM related movie review	2.2
SYT2006-116	Movies	Movies	Overseas	MSM	2006-03-12	2006-03-12	2006-03-01	2006	87	1232,1233	2	Overseas MSM movie entitled "斷背山"	1
SYT2006-219	News	HIV Education and Awareness	HK	General public-servants	2006-03-13	2006-03-12	2006-03-01	2006	148	1226	1	HIV Education for servants	2.2
YD2006-299	Movies	Others-MSM related movie	HK	MSM	2006-03-13	2006-03-12	2006-03-01	2006	212	1228, 1232-1233	3	《斷背山》MSM related movie review	2.2
SYT2006-218	News	Policy and Laws	Mainland China	PLHIV	2006-03-13	2006-03-12	2006-03-01	2006	147	1224	1	Suggestion about setting laws against HIV patients transmitting HIV deliberately	1
YD2006-297	News	HIV Transmission and Risks	Mainland	PLHIV	2006-03-14	2006-03-12	2006-03-01	2006	267	1224	1	倡設故意傳染愛滋罪	1
YD2006-295	Movies	Others-MSM related movie	Overseas	MSM	2006-03-14	2006-03-12	2006-03-01	2006	266	1218	1	《歌舞廳最後一夜》MSM related movie	1
YD2006-296	Movies	Others-MSM related movie	HK	MSM	2006-03-14	2006-03-12	2006-03-01	2006	212	1220	1	《斷背山》MSM related movie review	1
SYT2006-217	News	Surveys	Mainland China	Homosexuals	2006-03-14	2006-03-12	2006-03-01	2006	146	1216	1	Expert estimating there are 50 million homosexuals in China	2.2
YD2006-293	News	Events	HK	PLHIV	2006-03-15	2006-03-12	2006-03-01	2006	264	1214	1	Kiehl's contributed money for AIDS concern	1
YD2006-291	Movies	Others-MSM related movie	HK	MSM	2006-03-15	2006-03-12	2006-03-01	2006	212	1211	1	《斷背山》MSM related movie review	2.2
YD2006-292	News	Policy and Law	Overseas	Homosexuals	2006-03-15	2006-03-12	2006-03-01	2006	263	1212	1	英擬立例保障同性戀消費者	2.2
YD2006-288	News	Events	Mainland	MSM	2006-03-16	2006-03-12	2006-03-01	2006	261	1206	1	公廁斷背山	2.2
YD2006-290	Movies	Others-MSM related movie	HK	MSM	2006-03-16	2006-03-12	2006-03-01	2006	262	1208	1	《妖夜迴廊》Yanzu Wu acted as a gay	1
YD2006-289	Movies	Others-MSM related movie	HK	MSM	2006-03-16	2006-03-12	2006-03-01	2006	212	1207, 1210	2	《斷背山》MSM related movie review	2.2
YD2006-286	Movies	Others-MSM related movie	HK	MSM	2006-03-17	2006-03-12	2006-03-01	2006	212	1201	1	《斷背山》MSM related movie review	1
YD2006-285	Movies	Others-MSM related movie	Mainland	MSM	2006-03-17	2006-03-12	2006-03-01	2006	247	1200	1	《斷背山》not allowed to show in Mainland	2.2
YD2006-284	News	Events	HK	Celebrity	2006-03-18	2006-03-12	2006-03-01	2006	259	1197	1	華原 care about AIDS	1
SYT2006-064	News	Policy and Laws	HK	MSM	2006-03-18	2006-03-12	2006-03-01	2006	51	1196	1	Argument about the age limit of MSM Anal sex	2.2
YD2006-282	News	HIV Transmission and Risks	Mainland	PLHIV	2006-03-19	2006-03-19	2006-03-01	2006	257	1191	1	愛滋女北京賣淫輕判	1
YD2006-281	Movies	Others-MSM related movie	HK	MSM	2006-03-19	2006-03-19	2006-03-01	2006	212	1190, 1194, 1195	3	《斷背山》MSM related movie review	1
YD2006-278	News	Events	HK	PLHIV	2006-03-20	2006-03-19	2006-03-01	2006	254	1180, 1182, 1189	3	愛滋病者責警方沒收藥物	1
YD2006-279	News	Social Issues	HK	PLHIV	2006-03-20	2006-03-19	2006-03-01	2006	255	1181	1	The wife and child were infected with HIV by the husband	1
YD2006-280	news	Social Issues	HK	PLHIV	2006-03-20	2006-03-19	2006-03-01	2006	256	1184	1	憂夫傳染愛滋病婦女增加	1
YD2006-277	Movies	Others-MSM related movie	HK	MSM	2006-03-21	2006-03-19	2006-03-01	2006	212	1175-1177	3	《斷背山》MSM related movie review	2.2
YD2006-276	News	Events	Overseas	MSM	2006-03-22	2006-03-19	2006-03-01	2006	253	1174	1	斷背總統	1
YD2006-275	Movies	Others-MSM related movie	HK	MSM	2006-03-22	2006-03-19	2006-03-01	2006	212	1168	1	《斷背山》MSM related movie review	1
YD2006-274	Movies	Others-MSM related movie	HK	MSM	2006-03-23	2006-03-19	2006-03-01	2006	212	1167	1	《斷背山》MSM related movie review	1
YD2006-273	Movies	Others-MSM related movie	HK	MSM	2006-03-24	2006-03-19	2006-03-01	2006	212	1160	1	《斷背山》MSM related movie review	2.2
YD2006-272	News	Policy and Law	Overseas	Homosexuals	2006-03-27	2006-03-26	2006-03-01	2006	252	1150	1	《英國擬立例保障同性戀消費者》中，提及該新議案中認為「同性戀與種族和性別一樣....不應受歧視。」	1
YD2006-271	News	Others-MSM related movie	HK	MSM	2006-03-28	2006-03-26	2006-03-01	2006	212	1146	1	《斷背山》MSM related movie review	2.2
YD2006-270	News	Events	Overseas	MSM	2006-03-29	2006-03-26	2006-03-01	2006	251	1144-1145	2	李安揚威同志頒獎禮	2.2
YD2006-269	News	Events	Mainland	PLHIV	2006-03-30	2006-03-26	2006-03-01	2006	250	1139	1	愛滋義工獲獎	2.2
YD2006-268	News	HIV Science	HK	PLHIV	2006-03-31	2006-03-26	2006-03-01	2006	249	1135	1	愛滋病男性發病率較高	2.2
SYT2006-212	News	Celebrities	HK	General public	2006-04-01	2006-03-26	2006-04-01	2006	141	1132	1	Celebrity(深雪) promoting HIV prevention	1
YD2006-267	News	Events	Mainland	General Public	2006-04-03	2006-04-02	2006-04-01	2006	248	1127	1	蘭花籲關懷愛滋	1
YD2006-265	News	HIV Prevention	Overseas	General Public	2006-04-05	2006-04-02	2006-04-01	2006	246	1116	1	柏林宣傳性知識抗愛滋	2.2
YD2006-266	Movies	Others-MSM related movie	Mainland	MSM	2006-04-05	2006-04-02	2006-04-01	2006	247	1120	1	《斷背山》not allowed to show in Mainland	1
YD2006-264	News	Events	Overseas	MSM	2006-04-06	2006-04-02	2006-04-01	2006	245	1110	1	美家庭協會趕絕《斷背山》	1
YD2006-263	Movies	Others-AIDS related movies	Overseas	PLHIV	2006-04-07	2006-04-02	2006-04-01	2006	221	1109	1	《你是我的命運》AIDS related movie	1
YD2006-262	Movies	Others-MSM related movie	HK	MSM	2006-04-07	2006-04-02	2006-04-01	2006	244	1107	1	《俠盜高飛》MSM related movie	1
YD2006-261	News	Events	Overseas	Homosexuals	2006-04-08	2006-04-02	2006-04-01	2006	243	1105	1	《花花公子》拓同志市場	1
YD2006-258	News	Events	HK	PLHIV	2006-04-10	2006-04-09	2006-04-01	2006	240	1093	1	醫療故事：愛滋病人最後的隨行者	1
YD2006-259	News	Events	Overseas	Homosexuals	2006-04-10	2006-04-09	2006-04-01	2006	241	1097	1	第17屆同性戀反歧視聯盟傳媒頒獎禮	1
YD2006-260	News	Events	Overseas	MSM	2006-04-10	2006-04-09	2006-04-01	2006	242	1098	1	播《斷背山》予囚犯看獄長遭處分	1
YD2006-257	News	Events	Mainland	Celebrity	2006-04-11	2006-04-09	2006-04-01	2006	236	1090	1	梁詠琪任重道遠關懷愛滋	2.2
YD2006-256	News	Events	Overseas	Celebrity	2006-04-12	2006-04-09	2006-04-01	2006	235	1084, 1086	1	艾頓莊為愛滋賣家產	2.2
YD2006-251	News	Events	HK	PLHIV	2006-04-13	2006-04-09	2006-04-01	2006	229	1074	1	基金會將真實個案結集成書 愛滋病人至死都受歧視	1
YD2006-253	News	Social Issues	HK	PLHIV	2006-04-13	2006-04-09	2006-04-01	2006	231	1076	1	愛滋個案： 病毒傳嬰母親沒怨夫	1
YD2006-254	News	Social Issues	HK	PLHIV	2006-04-13	2006-04-09	2006-04-01	2006	232	1077-1079	3	AIDS boy was not allowed to attend games in hospital on Chrismas	1
SYT2006-208	News	Social Issues	HK	PLHIV	2006-04-13	2006-04-09	2006-04-01	2006	137	1076	1	Stories about discrimination of HIV patients	2.2
SYT2006-209	News	Social Issues	HK	PLHIV	2006-04-13	2006-04-09	2006-04-01	2006	138	1077	1	HIV patient was fired	2.2
YD2006-250	News	Events	Mainland	Celebrity	2006-04-14	2006-04-09	2006-04-01	2006	228	1072, 1074	2	GiGi登長城關懷愛滋	2.2
SYT2006-205	News	Social Issues	HK	Homosexuals	2006-04-14	2006-04-09	2006-04-01	2006	135	1071	1	Petition for same sex marrige legalization	2.2
YD2006-248	News	Events	HK	MSM	2006-04-16	2006-04-16	2006-04-01	2006	226	1064	1	樞機主持彌撒「俏新娘」爭權益	1
YD2006-247	News	HIV Prevention	Overseas	General Public	2006-04-16	2006-04-16	2006-04-01	2006	225	1063	1	在落後地區宣傳預防愛滋，確有難度	2.2
SYT2006-199	News	HIV prevention	Mainland China	MSM	2006-04-17	2006-04-16	2006-04-01	2006	131	1057	1	Lectures for MSM to promote HIV prevention	2.2
YD2006-246	News	Policy and Law	HK	Homosexuals	2006-04-17	2006-04-16	2006-04-01	2006	224	1059, 1061	2	港拒ＢＮＯ同性戀者註冊	2.2
SYT2006-200	News	Social Issues	HK	General public-university students	2006-04-17	2006-04-16	2006-04-01	2006	132	1058	1	University student manual is charged with discrimination of homosexuals	2.2
YD2006-243	Movies	Others-AIDS related movies	Overseas	Celebrity	2006-04-18	2006-04-16	2006-04-01	2006	221	1051-1053	3	《你是我的命運》AIDS related movie	1
YD2006-242	News	HIV Transmission and Risks	Mainland	General Public	2006-04-20	2006-04-16	2006-04-01	2006	220	1047	1	北上美容紋眉易染愛滋	1
YD2006-240	News	Events	Taiwan	Celebrity	2006-04-21	2006-04-16	2006-04-01	2006	218	1045	1	Zhiling Lin wants to visite AIDS orphans next month	2.2
SYT2006-198	News	HIV transmission or risk	Mainland China	General public-patients using unsafe medicine	2006-04-21	2006-04-16	2006-04-01	2006	130	1046	1	Unsafe medicine transmitting HIV to patients	2.2
YD2006-239	News	Events	HK	Celebrity	2006-04-22	2006-04-16	2006-04-01	2006	212	1043	1	Yifeng Lin 演繹男同志電影《斷背山》（Brokeback Mountain）的一首插曲	1
YD2006-237	News	HIV Transmission and Risks	Mainland	General Public	2006-04-23	2006-04-23	2006-04-01	2006	217	1037	1	內地性病患逐年升	1
YD2006-238	Movies	Others-MSM related movie	HK	MSM	2006-04-23	2006-04-23	2006-04-01	2006	212	1038	1	《斷背山》MSM related movie review	1
SYT2006-197	News	Sex-related crime	HK	MSM	2006-04-23	2006-04-23	2006-04-01	2006	129	1036	1	MSM sex-related crime	2.2
SYT2006-048	News	Policy and Laws	Overseas	PLHIV	2006-04-25	2006-04-23	2006-04-01	2006	39	1033	1	Catholicism allowing HIV patients use condoms	1
SYT2006-196	News	Others-magazine	Overseas	MSM	2006-04-29	2006-04-23	2006-04-01	2006	128	1021	1	MSM magazine entitled "烏托邦指南"	2.2
YD2006-233	News	Events	HK	Celebrity	2006-04-30	2006-04-30	2006-04-01	2006	214	1016-1017	2	李彩華、羅明珠及陳沛嘉等，前晚聯同關懷愛滋紅絲帶大使馬德鐘，到中環出席愛滋病團體舉辦的慈善派對	1
YD2006-232	News	Events	HK	Celebrity	2006-04-30	2006-04-30	2006-04-01	2006	213	1014-1015	2	林嘉欣向愛滋病患者遺孤送暖	2.2
YD2006-234	Movies	Others-MSM related movie	HK	MSM	2006-04-30	2006-04-30	2006-04-01	2006	212	1019	1	《斷背山》MSM related movie review	1
YD2006-231	Movies	Others-MSM related movie	Taiwan	MSM	2006-05-03	2006-04-30	2006-05-01	2006	212	1007	1	《斷背山》MSM related movie	1
YD2006-230	News	Events	Overseas	MSM	2006-05-06	2006-04-30	2006-05-01	2006	211	1000	1	憑曲寄意性在自由 明哥、阿詩鬥唱斷背歌	1
YD2006-229	News	Events	Overseas	MSM	2006-05-07	2006-05-07	2006-05-01	2006	210	997	1	平井堅拖實冰川清約會	1
YD2006-228	News	HIV Science	Overseas	PLHIV	2006-05-09	2006-05-07	2006-05-01	2006	209	990	1	蛋白質研究醫愛滋	2.2
YD2006-227	News	HIV Test	Overseas	General Public	2006-05-10	2006-05-07	2006-05-01	2006	208	985	1	愛滋測試 美納身體檢查	2.2
SYT2006-192	News	Social Issues	Mainland China	Homosexuals	2006-05-10	2006-05-07	2006-05-01	2006	124	984	1	Free homosexuals hotline	2.2
YD2006-224	News	Events	Overseas	Celebrity	2006-05-11	2006-05-07	2006-05-01	2006	205	982	1	紅計劃：抗愛滋Product RED	2.2
YD2006-225	News	HIV Transmission and Risks	HK	General Public	2006-05-11	2006-05-07	2006-05-01	2006	206	983	1	年輕女性易重複感染衣原體	1
SYT2006-191	News	Events	HK	General public	2006-05-12	2006-05-07	2006-05-01	2006	123	973-975,977	4	「Watoto 兒童合唱團」visiting HK to collect donation	2.2
YD2006-222	News	Events	Overseas	Celebrity	2006-05-13	2006-05-07	2006-05-01	2006	205	972	1	紅計劃：抗愛滋Product RED陸續有來	2.2
SYT2006-185	News	Celebrities	HK	PLHIV	2006-05-15	2006-05-14	2006-05-01	2006	120	969	1	Celebrity(林志玲) visiting African HIV patients and collecting donation for HIV patients	1
YD2006-221	News	HIV Science	Overseas	General Public	2006-05-15	2006-05-14	2006-05-01	2006	204	968	1	生物盔甲抗愛滋	2.2
SYT2006-184	News	Celebrities	HK	PLHIV	2006-05-17	2006-05-14	2006-05-01	2006	120	963	1	Celebrity(林志玲) visiting African HIV patients and collecting donation for HIV patients	1
YD2006-220	News	Events	Overseas	Celebrity	2006-05-17	2006-05-14	2006-05-01	2006	203	959	1	Bono為愛滋做客席編輯	2.2
YD2006-218	News	Events	Overseas	Celebrity	2006-05-19	2006-05-14	2006-05-01	2006	201	945	1	Bono探愛滋病人心酸	2.2
YD2006-219	News	Events	Overseas	Celebrity	2006-05-19	2006-05-14	2006-05-01	2006	202	949	1	志玲賣相送吻助愛滋孤兒	2.2
SYT2006-172	News	Others-volunteers	Mainland China	PLHIV	2006-05-20	2006-05-14	2006-05-01	2006	112	942	1	Volunteer 高耀潔 concerning AIDS	1
YD2006-217	News	Events	HK	PLHIV	2006-05-21	2006-05-21	2006-05-01	2006	200	939	1	Watoto大合唱 a group of orphans who left by their AIDS patients and they sing in HK in order to raise fund to help more orphans like themselves	1
YD2006-216	News	Events	HK	Homosexuals	2006-05-21	2006-05-21	2006-05-01	2006	185	937	1	第二屆國際不再恐同（不再恐懼同性戀）日大遊行於銅鑼灣東角道舉行	2.2
YD2006-214	News	Events	HK	Homosexuals	2006-05-22	2006-05-21	2006-05-01	2006	185	927, 929	2	第二屆國際不再恐同（不再恐懼同性戀）日大遊行於銅鑼灣東角道舉行	2.2
YD2006-215	News	Events	Overseas	Celebrity	2006-05-22	2006-05-21	2006-05-01	2006	190	928, 930	2	維也納市政廳舉行第14屆周年慈善晚會	2.2
YD2006-213	Movies	Others-homosexuals related movie	Overseas	Homosexuals	2006-05-23	2006-05-21	2006-05-01	2006	189	923	1	《Shortbus 》homosexuals related movie	1
YD2006-212	News	HIV Surveillance	HK	PLHIV	2006-05-24	2006-05-21	2006-05-01	2006	188	911-914	4	首季89人染愛滋急增36％	2.2
YD2006-209	News	Events	HK	Homosexuals	2006-05-26	2006-05-21	2006-05-01	2006	185	896	1	第二屆國際不再恐同（不再恐懼同性戀）日大遊行於銅鑼灣東角道舉行	2.2
SYT2006-179	News	HIV Science	Overseas	PLHIV	2006-05-26	2006-05-21	2006-05-01	2006	116	897	1	HIV came from gorilla at first	2.2
SYT2006-180	News	Surveys	HK	Homosexuals	2006-05-26	2006-05-21	2006-05-01	2006	117	898-900	3	《香港同志平權報告》	2.2
SYT2006-174	News	Event	Overseas	Celebrities	2006-05-27	2006-05-21	2006-05-01	2006	114	890,891	2	amfAR dinner	2.2
YD2006-207	Movies	Others-MSM related movie	Overseas	MSM	2006-05-28	2006-05-28	2006-05-01	2006	183	889	1	《海神號》MSM related movie	1
YD2006-206	News	HIV Transmission and Risks	Overseas	PLHIV	2006-05-29	2006-05-28	2006-05-01	2006	186	886	1	德國傷人案1傷者帶愛滋病毒	1
YD2006-204	News	Events	HK	General Public	2006-05-31	2006-05-28	2006-05-01	2006	184	882	1	Yaojie Gao transferred her work about helping AIDS patients in He'nan to one Hong Kong intitution	2.2
SYT2006-173	News	Sex-related crime	Overseas	MSM	2006-05-31	2006-05-28	2006-05-01	2006	113	883	1	Sex-related crime in train	2.2
YD2006-203	Movies	Others-MSM related movie	Overseas	MSM	2006-06-04	2006-06-04	2006-06-01	2006	183	871	1	《海神號》MSM related movie	1
SYT2006-170	News	HIV Treatment	Overseas	PLHIV	2006-06-09	2006-06-04	2006-06-01	2006	111	854	1	Chinese Medicine can cure HIV	2.2
YD2006-201	News	Others-MSM related movie	Overseas	MSM	2006-06-11	2006-06-11	2006-06-01	2006	181	850	1	李安被批鼓吹斷背	1
YD2006-200	News	Policy and Law	Overseas	Homosexuals	2006-06-11	2006-06-11	2006-06-01	2006	180	848	1	美國國會經過一輪激辯之後，否決了由總統布殊為首推動的禁止同性戀婚姻憲法修正案	2.2
YD2006-198	News	HIV Education and Awareness	Mainland	General Public	2006-06-15	2006-06-11	2006-06-01	2006	178	833	1	19 years old woman has no interests in learning the knowledge of AIDS	1
YD2006-199	News	HIV Transmission and Risks	Mainland	General Public	2006-06-15	2006-06-11	2006-06-01	2006	179	834	1	穗30%外來女工對性病無知 一成未婚民工公園交歡	1
YD2006-197	News	HIV Transmission and Risks	Mainland	General Public	2006-06-16	2006-06-11	2006-06-01	2006	177	826	1	貴州賣血佔全國市場	1
YD2006-196	News	Events	Mainland	MSM	2006-06-23	2006-06-18	2006-06-01	2006	176	801	1	新疆男避到北京逃離斷背上司魔掌	1
YD2006-194	Movies	Others-MSM related movie	HK	MSM	2006-06-24	2006-06-18	2006-06-01	2006	174	789	1	阿Don acted as a gay in a new movie	2.2
YD2006-195	News	Surveys	HK	PLHIV	2006-06-24	2006-06-18	2006-06-01	2006	175	795	1	僅34%妓知口交可染愛滋	1
YD2006-193	News	Events	Overseas	PLHIV	2006-06-26	2006-06-25	2006-06-01	2006	173	781	1	拉姑年半籌款1.6億	1
SYT2006-167	News	Event	Overseas	MSM	2006-06-27	2006-06-25	2006-06-01	2006	108	785	1	Gay pride walks	1
SYT2006-166	News	Events	Overseas	Celebrities	2006-06-27	2006-06-25	2006-06-01	2006	107	781	1	Celebrity(Pamela Anderson) collecting money for AIDS fund	1
SYT2006-164	News	HIV surveillance	Mainland China	PLHIV	2006-06-28	2006-06-25	2006-06-01	2006	105	771,778	2	HIV surveillance results in Shenzhen	2.2
SYT2006-165	News	Surveys	Overseas	General public-male	2006-06-28	2006-06-25	2006-06-01	2006	106	772,774	2	Those who have more brothers are more likely become MSM	2.2
SYT2006-161	News	HIV testing	Overseas	General public-citizens	2006-06-29	2006-06-25	2006-06-01	2006	103	765	1	Large-scale HIV tests for citizens in Washington	2.2
YD2006-190	News	others-MSM related TV series	Overseas	MSM	2006-06-29	2006-06-25	2006-06-01	2006	170	766	1	《王的男人》MSM related TV series	2.2
YD2006-187	News	Events	Overseas	MSM	2006-06-30	2006-06-25	2006-06-01	2006	167	761	1	A gay worked in sexy store talk about gays' lives in German	1
SYT2006-160	News	HIV Vaccine	Overseas	PLHIV	2006-06-30	2006-06-25	2006-06-01	2006	102	762	1	New HIV vaccine made in tomato	2.2
YD2006-186	News	Social Issues	Overseas	MSM	2006-07-03	2006-07-02	2006-07-01	2006	166	752	1	HOLLAND Metro Amsterdam OId gays feel biased in nursing homes	1
SYT2006-159	News	Event	Overseas	MSM	2006-07-04	2006-07-02	2006-07-01	2006	101	748	1	Europe MSM Festival	2.2
YD2006-185	News	Events	Overseas	MSM	2006-07-04	2006-07-02	2006-07-01	2006	165	748	1	同志伊恩在歐洲同性戀節中壓軸的「最有影響力同志」選舉位列第一	1
YD2006-183	News	Events	Overseas	Celebrity	2006-07-05	2006-07-02	2006-07-01	2006	163	741	1	「大姑媽」慈善舞會抗愛滋	2.2
SYT2006-157	News	HIV transmission or risk	Others-Macao	PLHIV	2006-07-06	2006-07-02	2006-07-01	2006	99	736	1	More than 10 prisoners are HIV positive in Macao	2.2
SYT2006-063	News	Policy and Laws	HK	MSM	2006-07-07	2006-07-02	2006-07-01	2006	51	732,733	2	Argument about the age limit of MSM Anal sex	2.2
SYT2006-156	News	HIV prevention	HK	General public-male	2006-07-12	2006-07-09	2006-07-01	2006	98	711	1	Circumcision decreasing the probability of HIV infection	2.2
SYT2006-154	News	HIV Treatment	Overseas	PLHIV	2006-07-14	2006-07-09	2006-07-01	2006	96	705,706	2	New HIV medicine in US	2.2
SYT2006-155	News	Social Issues	Overseas	MSM	2006-07-14	2006-07-09	2006-07-01	2006	97	707	1	MSM soccer fan club	1
YD2006-178	News	Events	HK	General Public	2006-07-15	2006-07-09	2006-07-01	2006	159	703	1	香港愛滋病基金會義工招募	1
YD2006-177	News	Events	Overseas	PLHIV	2006-07-16	2006-07-16	2006-07-01	2006	158	700	1	巴塞與兒童基金會合作 help orphans who are left by their AIDS parents	1
YD2006-175	News	HIV Transmission and Risks	HK	General Public	2006-07-18	2006-07-16	2006-07-01	2006	155	691	1	43%北上港男濫藥召妓打孖上	1
YD2006-176	News	Social Issues	Mainland	PLHIV	2006-07-18	2006-07-16	2006-07-01	2006	156	692	1	愛滋病人遺孤告媒體侵權勝訴	1
YD2006-173	News	HIV Transmission and Risks	HK	MSM	2006-07-19	2006-07-16	2006-07-01	2006	153	687	1	男同性戀者是愛滋病的高危族群	2.2
SYT2006-153	Editorial	Social Issues	HK	Homosexuals	2006-07-19	2006-07-16	2006-07-01	2006	95	688	1	Anti-Homosexuals	2.2
YD2006-172	News	Others-Articles about MSM	Overseas	MSM	2006-07-20	2006-07-16	2006-07-01	2006	152	686	1	英國男人同性戀的名聲	1
SYT2006-151	News	Event	Overseas	MSM	2006-07-21	2006-07-16	2006-07-01	2006	93	681	1	The seventh Gay Games	2.2
YD2006-170	News	Social Issues	HK	Homosexuals	2006-07-21	2006-07-16	2006-07-01	2006	150	679	1	「恐同」本身也是行為差異	1
YD2006-168	News	Events	Overseas	MSM	2006-07-24	2006-07-23	2006-07-01	2006	148	671	1	Kenny Goss' relationship with 佐治米高	1
SYT2006-150	News	Others-News report	HK	MSM	2006-07-24	2006-07-23	2006-07-01	2006	92	672	1	"蘋果" got MSM news report award	1
YD2006-167	News	Social Issues	HK	PLHIV	2006-07-24	2006-07-23	2006-07-01	2006	147	670	1	港人嚴重歧視愛滋病者	2.2
YD2006-166	News	Events	Overseas	MSM	2006-07-28	2006-07-23	2006-07-01	2006	146	660	1	Lance Bass昨日在名人雜誌《People》發表「出櫃告白」，公開承認自己是同性戀者	1
YD2006-165	News	Events	HK	PLHIV	2006-07-30	2006-07-30	2006-07-01	2006	145	650, 651	2	愛滋狂徒圖奪槍自殺	1
SYT2006-148	News	HIV surveillance	HK	PLHIV	2006-07-30	2006-07-30	2006-07-01	2006	90	657	1	Local HIV surveillance results	1
SYT2006-147	News	Events	HK	Celebrities	2006-08-08	2006-08-06	2006-08-01	2006	89	617,618,622	3	Celebrity(鄧萃雯) as HIV prevention ambassador	2.2
SYT2006-092	News	Sex-related crime	HK	MSM	2006-08-09	2006-08-06	2006-08-01	2006	74	612,616	2	郭文龍 opening club house where sex service can be provided	2.2
SYT2006-146	News	Sex-related crime	Mainland China	MSM	2006-08-10	2006-08-06	2006-08-01	2006	88	605,610	2	MSM illegal club is closed	2.2
YD2006-160	News	Events	Overseas	Homosexuals	2006-08-11	2006-08-06	2006-08-01	2006	141	597	1	球迷作歌笑同性戀被罰	1
YD2006-161	News	Events	Mainland	PLHIV	2006-08-11	2006-08-06	2006-08-01	2006	142	599	1	conversation with children whose parents are all AIDS patients	1
YD2006-159	News	Events	Overseas	Celebrity	2006-08-11	2006-08-06	2006-08-01	2006	140	596	1	蓋茨夫婦再豪捐39億 for help fight with infectious diseases including AIDS	2.2
YD2006-158	News	Events	Overseas	Celebrity	2006-08-12	2006-08-06	2006-08-01	2006	139	595	1	桂莉芙扮非洲人救兒童	1
YD2006-157	News	HIV Surveillance	Mainland	PLHIV	2006-08-13	2006-08-13	2006-08-01	2006	138	590	1	大陸監測同志性病	1
YD2006-156	News	HIV Prevention	Mainland	PLHIV	2006-08-14	2006-08-13	2006-08-01	2006	137	588	1	中美建沙士愛滋疫苗研究所	1
SYT2006-106	News	HIV surveillance	Overseas	PLHIV	2006-08-14	2006-08-13	2006-08-01	2006	86	585	1	HIV surveillance results in India	2.2
YD2006-155	Movies	Others-MSM related movie	Overseas	MSM	2006-08-14	2006-08-13	2006-08-01	2006	136	586	1	網民愛小本基片《斷背山》美同志最啱	2.2
YD2006-153	News	Events	Overseas	Celebrity	2006-08-15	2006-08-13	2006-08-01	2006	134	578, 579	2	Alicia Keys關懷愛滋	2.2
SYT2006-104	News	Social Issues	Mainland China	Homosexuals	2006-08-15	2006-08-13	2006-08-01	2006	84	576,577,580	3	Official homosexuals website	2.2
YD2006-150	News	Events	Overseas	Celebrity	2006-08-17	2006-08-13	2006-08-01	2006	131	570	1	蓋茨基金會2億助華抗愛滋	2.2
SYT2006-103	News	HIV prevention	HK	General public	2006-08-17	2006-08-13	2006-08-01	2006	83	571	1	New method to prevent HIV	2.2
SYT2006-099	News	HIV prevention	Mainland China	General public	2006-08-18	2006-08-13	2006-08-01	2006	81	566	1	Gates Fund donation to Mainland China HIV prevention	1
SYT2006-102	Others-cartoon	Others-cartoon	Overseas	MSM	2006-08-18	2006-08-13	2006-08-01	2006	82	567	1	Japanese MSM cartoon entitled "同人誌"	1
YD2006-149	News	HIV Transmission and Risks	Overseas	General Public	2006-08-19	2006-08-13	2006-08-01	2006	130	563	1	柬埔寨嫖客在三杯到肚後都偏愛不設防，令當地的愛滋病個案不斷上升	1
YD2006-148	News	HIV-related crime	HK	PLHIV	2006-08-19	2006-08-13	2006-08-01	2006	129	562	1	獨行竊賊稱有愛滋	1
YD2006-147	News	Others-homosexuals related TV series	HK	Homosexuals	2006-08-20	2006-08-20	2006-08-01	2006	128	560	1	《自己人》探討同志文化	2.2
SYT2006-097	News	HIV prevention	Overseas	General public-female	2006-08-21	2006-08-20	2006-08-01	2006	79	555	1	HIV prevention tool and medicine research for female	2.2
YD2006-145	News	Events	Overseas	Celebrity	2006-08-22	2006-08-20	2006-08-01	2006	126	554	1	Bono出Tee對抗愛滋	2.2
YD2006-144	News	Events	Overseas	MSM	2006-08-24	2006-08-20	2006-08-01	2006	125	549	1	柏林的同性戀區Schoneberg將舉行第三屆性虐待會Folsom Europe	1
YD2006-143	Movies	Others-MSM related movie	HK	MSM	2006-08-25	2006-08-20	2006-08-01	2006	124	545	1	吳建豪、安七炫杜絕斷背	1
SYT2006-096	News	Surveys	Overseas	General public-congressmen	2006-08-26	2006-08-20	2006-08-01	2006	78	543	1	66% congressmen misunderstanding HIV	2.2
YD2006-140	News	HIV Science	Overseas	PLHIV	2006-08-28	2006-08-27	2006-08-01	2006	121	532	1	愛滋新發現有助療法	2.2
YD2006-141	News	Sex-related crime	HK	MSM	2006-08-28	2006-08-27	2006-08-01	2006	122	533	1	港拘留30泰鴨	1
YD2006-137	News	Event	Overseas	Celebrity	2006-08-30	2006-08-27	2006-08-01	2006	118	524	1	Alicia籲女fans防愛滋	2.2
SYT2006-093	News	HIV surveillance	HK	PLHIV	2006-08-30	2006-08-27	2006-08-01	2006	75	522,523,525,529	4	Local HIV surveillance results	2.2
YD2006-139	Movies	Others-MSM related movie	Overseas	MSM	2006-08-30	2006-08-27	2006-08-01	2006	120	526	1	《衰仔》侯賽因係基佬	1
SYT2006-091	News	Sex-related crime	HK	MSM	2006-08-31	2006-08-27	2006-08-01	2006	74	517-519	3	郭文龍 opening club house where sex service can be provided	1
YD2006-134	News	HIV Transmission and Risks	Overseas	General Public	2006-09-03	2006-09-03	2006-09-01	2006	115	510	1	安全套循環再用	1
YD2006-133	News	HIV Transmission and Risks	Mainland	General Public	2006-09-04	2006-09-03	2006-09-01	2006	114	506	1	內地性工作者用安全套比率跌	1
SYT2006-090	News	HIV transmission or risk	Overseas	PLHIV	2006-09-05	2006-09-03	2006-09-01	2006	73	504	1	First HIV2 case in Japan	2.2
YD2006-131	News	Events	HK	MSM	2006-09-06	2006-09-03	2006-09-01	2006	112	499	1	同性戀者	1
YD2006-130	News	Events	Overseas	PLHIV	2006-09-07	2006-09-03	2006-09-01	2006	111	495	1	Eussia helps Africa' AIDS problems	1
YD2006-129	News	Events	Overseas	MSM	2006-09-08	2006-09-03	2006-09-01	2006	110	494	1	《小小小英國》肥仔與男友拉埋天窗	1
YD2006-128	News	HIV-related crime	HK	PLHIV	2006-09-08	2006-09-03	2006-09-01	2006	108	489	1	稱患愛滋越漢被控持刀劫的士	1
YD2006-127	News	Events	Overseas	PLHIV	2006-09-09	2006-09-03	2006-09-01	2006	109	487	1	美20少男性侵11歲愛滋女	1
YD2006-126	News	Social Issues	HK	PLHIV	2006-09-09	2006-09-03	2006-09-01	2006	108	484	1	稱患愛滋越漢被控持刀劫的士	1
SYT2006-089	News	HIV transmission or risk	HK	PLHIV	2006-09-10	2006-09-10	2006-09-01	2006	72	483	1	First HIV case in HK is revealed	1
YD2006-125	News	HIV Transmission and Risks	Overseas	General Public	2006-09-11	2006-09-10	2006-09-01	2006	107	476	1	英國病人移植被盜死人骨 或感染愛滋	1
YD2006-124	News	Events	HK	PLHIV	2006-09-13	2006-09-10	2006-09-01	2006	104	471	1	助3千愛滋遺孤 杜聰膺世界傑青	2.2
SYT2006-088	News	HIV surveillance	Mainland China	PLHIV	2006-09-13	2006-09-10	2006-09-01	2006	71	470	1	HIV surveillance results in Mainland China	2.2
YD2006-122	News	Events	Overseas	Celebrity	2006-09-14	2006-09-10	2006-09-01	2006	105	466	1	索羅斯捐3.9億非洲扶貧 and help AIDS treatment and prevention	1
SYT2006-086	News	Events	HK	PLHIV	2006-09-14	2006-09-10	2006-09-01	2006	70	462-465,468	5	HK outstanding volunteer(杜聰) concerning HIV treatment and prevention	2.2
YD2006-120	News	HIV Science	Overseas	General Public	2006-09-15	2006-09-10	2006-09-01	2006	103	457	1	濫用類固醇 can lead to infected with HIV	1
SYT2006-085	News	HIV Treatment	HK	PLHIV	2006-09-15	2006-09-10	2006-09-01	2006	69	455,456	2	何大一 concerning HIV treatment in Mainland China	2.2
YD2006-118	News	Events	Overseas	MSM	2006-09-17	2006-09-17	2006-09-01	2006	101	451	1	西班牙兩名男性空軍士兵前日在塞維利亞市政廳舉行婚禮	2.2
YD2006-117	News	HIV Treatment	HK	PLHIV	2006-09-20	2006-09-17	2006-09-01	2006	100	441	1	何大一籲訂長遠目標抗愛滋	2.2
SYT2006-082	News	Policy and Laws	HK	MSM	2006-09-21	2006-09-17	2006-09-01	2006	66	435-438	4	MSM fighting for rights	2.2
YD2006-115	News	Events	Overseas	Celebrity	2006-09-22	2006-09-17	2006-09-01	2006	98	434	1	畢仔安祖蓮娜1,600萬救病童	1
YD2006-114	News	HIV Science	Overseas	General Public	2006-09-22	2006-09-17	2006-09-01	2006	94	429, 433	2	吸煙者或較易感染愛滋病毒	2.2
SYT2006-081	News	HIV surveillance	HK	PLHIV	2006-09-22	2006-09-17	2006-09-01	2006	65	427,428	2	Local HIV surveillance results	2.2
YD2006-111	News	Events	Overseas	MSM	2006-09-25	2006-09-24	2006-09-01	2006	95	419	1	同志柏林市長連任成功	1
YD2006-112	News	Events	Overseas	Celebrity	2006-09-25	2006-09-24	2006-09-01	2006	96	421	1	姬蒂變黑珍珠關注愛滋	2.2
SYT2006-077	News	Surveys	HK	General public-Truck drivers	2006-09-26	2006-09-24	2006-09-01	2006	62	415,417	2	Survey about truck drivers who move between Shenzhen and HK	2.2
SYT2006-078	News	Surveys	Overseas	General public-smokers	2006-09-26	2006-09-24	2006-09-01	2006	63	416	1	Smokers are more likely infected HIV	2.2
YD2006-108	News	Events	Overseas	MSM	2006-09-28	2006-09-24	2006-09-01	2006	92	410	1	MSM	1
YD2006-107	News	Events	Overseas	MSM	2006-09-29	2006-09-24	2006-09-01	2006	91	408	1	夜蒲男變性獵物	1
YD2006-135	News	Events	HK	MSM	2006-09-30	2006-09-24	2006-09-01	2006	116	517-519	3	容許男按摩師提供性服務輕判社會服務 藝人郭文龍開鴨店免坐牢	1
YD2006-136	News	HIV Surveillance	HK	PLHIV	2006-09-30	2006-09-24	2006-09-01	2006	117	522-523	1	第二季有90人證實感染愛滋病，71名男性及19名女性患者中，有22人透過異性性接觸感染，26人透過同性或雙性性接觸	1
SYT2006-076	News	Social Issues	Overseas	PLHIV	2006-10-04	2006-10-01	2006-10-01	2006	61	393	1	Matchmaking between HIV patients	2.2
YD2006-105	News	Events	Overseas	MSM	2006-10-05	2006-10-01	2006-10-01	2006	89	391, 392	2	美議員露骨性醜聞曝光	1
SYT2006-073	News	Events	Overseas	Celebrity	2006-10-06	2006-10-01	2006-10-01	2006	58	384-386	3	Celebrity(Madonna) visiting Africa HIV infected children	1
YD2006-104	News	Events	Overseas	MSM	2006-10-06	2006-10-01	2006-10-01	2006	88	383	1	積嘉倫賀網上拍賣「斷背」戲服	1
YD2006-103	News	Events	Overseas	PLHIV	2006-10-06	2006-10-01	2006-10-01	2006	87	382	1	美媽媽送愛到非洲 越洋捐母乳救孤兒	2.2
YD2006-102	News	HIV Prevention	Overseas	General Public	2006-10-06	2006-10-01	2006-10-01	2006	86	380	1	人口普查員獲派安全套	1
YD2006-101	News	HIV Science	Overseas	PLHIV	2006-10-06	2006-10-01	2006-10-01	2006	85	379	1	HIV prevention tool and medicine research for female	2.2
YD2006-100	News	Events	Overseas	Celebrity	2006-10-07	2006-10-01	2006-10-01	2006	84	377	1	Madonna visited orphans left by AIDS parents in Africa	2.2
SYT2006-071	News	Social Issues	Overseas	General public-middle school students	2006-10-09	2006-10-08	2006-10-01	2006	57	373	1	Middle school student against homework related homosexuals	1
YD2006-099	News	Events	HK	Celebrity	2006-10-10	2006-10-08	2006-10-01	2006	83	369	1	郭少明承諾 贏馬捐獎金 help AIDS patients	1
SYT2006-070	News	HIV prevention	Overseas	General public	2006-10-10	2006-10-08	2006-10-01	2006	56	372	1	Anti-HIV jelly in Thailand	1
YD2006-098	News	Policy and Law	Overseas	PLHIV	2006-10-11	2006-10-08	2006-10-01	2006	82	366	1	防愛滋性禁令	2.2
YD2006-097	News	Events	HK	Celebrity	2006-10-12	2006-10-08	2006-10-01	2006	81	363	1	朴貞兒義賣所籌得的5,000萬韓圜（約41萬港元）善款將會用作推動青少年性教育及預防愛滋病用途	1
YD2006-096	News	Events	HK	Homosexuals	2006-10-13	2006-10-08	2006-10-01	2006	80	360	1	同志影展播放31齣好戲	2.2
YD2006-095	News	Events	Overseas	Celebrity	2006-10-14	2006-10-08	2006-10-01	2006	79	354	1	Bono賣物援愛滋	2.2
YD2006-094	News	HIV Education and Awareness	HK	Celebrity	2006-10-15	2006-10-15	2006-10-01	2006	78	352	1	名模「關懷愛滋」	1
SYT2006-039	News	HIV prevention	Mainland China	General public-prostitutes	2006-10-16	2006-10-15	2006-10-01	2006	34	347	1	HIV prevention promotion in prostitutes	2.2
SYT2006-065	News	HIV surveillance	HK	PLHIV	2006-10-16	2006-10-15	2006-10-01	2006	52	346	1	Increasing teenagers are HIV positive	2.2
YD2006-090	News	HIV Education and Awareness	Mainland	General Public	2006-10-17	2006-10-15	2006-10-01	2006	75	343	1	政府開班教妓女防愛滋	1
SYT2006-062	News	Policy and Laws	HK	MSM	2006-10-17	2006-10-15	2006-10-01	2006	51	344	1	Argument about the age limit of MSM Anal sex	2.2
YD2006-088	News	HIV Transmission and Risks	Mainland	PLHIV	2006-10-18	2006-10-15	2006-10-01	2006	73	337	1	內地愛滋病蔓延迅速像非洲	2.2
YD2006-089	News	MSM-related crime	HK	MSM	2006-10-18	2006-10-15	2006-10-01	2006	74	338	1	19歲男生肛交脫罪律政司上訴終院	1
YD2006-087	News	Events	HK	MSM	2006-10-19	2006-10-15	2006-10-01	2006	72	334	1	懲教署主任涉嫌性侵犯一名十四歲男囚犯事件	1
YD2006-086	News	HIV Education and Awareness	HK	General Public	2006-10-19	2006-10-15	2006-10-01	2006	71	332	1	渣打「關心愛滋大使」隊伍，教育員工、家屬同社區，積極面對愛滋病帶來的問題	1
SYT2006-061	News	Sex-related crime	HK	MSM	2006-10-21	2006-10-15	2006-10-01	2006	50	329	1	HKU student committed sex-related crime	2.2
SYT2006-008	News	HIV-related crime	Mainland China	PLHIV	2006-10-23	2006-10-22	2006-10-01	2006	6	322	1	HIV patients committing a crime because no laws restricts them	2.2
YD2006-082	Movies	Others-MSM related movie	Overseas	MSM	2006-10-27	2006-10-22	2006-10-01	2006	67	305	1	《當》MSM related movie	1
SYT2006-059	News	Policy and Laws	Overseas	Homosexuals	2006-10-27	2006-10-22	2006-10-01	2006	49	309,310	2	Overseas homosexuals rights law, spanned several countries	2.2
SYT2006-058	News	Social Issues	Mainland China	Homosexuals	2006-10-30	2006-10-29	2006-10-01	2006	48	297,300	2	Zhongshan University allowing homosexuals club	2.2
SYT2006-038	News	HIV prevention	Mainland China	General public-prostitutes	2006-10-31	2006-10-29	2006-10-01	2006	34	294	1	HIV prevention promotion in prostitutes	1
SYT2006-057	Editorial	Policy and Laws	HK	MSM	2006-10-31	2006-10-29	2006-10-01	2006	47	293	1	Anal sex should not happen at younger age	1
YD2006-080	News	Surveys	HK	MSM	2006-10-31	2006-10-29	2006-10-01	2006	65	293	1	雖然男同性戀者只佔約整體人口少於2%，但因男性間接觸而受HIV感染的個案卻佔整體HIV受感染個案25%	1
YD2006-079	News	MSM-related crime	HK	MSM	2006-11-02	2006-10-29	2006-11-01	2006	64	288	1	已婚男慘遭男波士掃背脊	1
YD2006-078	News	Events	Overseas	MSM	2006-11-04	2006-10-29	2006-11-01	2006	63	279	1	支持共和黨宗教組織主席涉召男妓被炒	1
SYT2006-056	News	Social Issues	HK	PLHIV	2006-11-06	2006-11-05	2006-11-01	2006	46	275	1	HIV patients suffering discrimination from nurses	1
YD2006-077	News	Social Issues	Overseas	MSM	2006-11-06	2006-11-05	2006-11-01	2006	63	270, 276	1	懷疑同性戀美國牧師被開除	1
SYT2006-060	News	Sex-related crime	HK	MSM	2006-11-07	2006-11-05	2006-11-01	2006	50	264	1	HKU student committed sex-related crime	1
YD2006-075	News	Events	HK	MSM	2006-11-09	2006-11-05	2006-11-01	2006	61	255	1	13歲仔搵快錢10元提供性服務	1
YD2006-076	News	MSM-related crime	HK	MSM	2006-11-09	2006-11-05	2006-11-01	2006	62	264	1	港大生與少男肛交罪成	1
YD2006-073	News	HIV Science	Overseas	Gorillas	2006-11-10	2006-11-05	2006-11-01	2006	59	247	1	猿類愛滋病威脅人類	2.2
SYT2006-043	News	HIV transmission or risk	Mainland China	General public-officials	2006-11-10	2006-11-05	2006-11-01	2006	36	245,246,249	3	Chinese officials is HIV high risk group	2.2
YD2006-074	News	Policy and Law	Overseas	MSM	2006-11-10	2006-11-05	2006-11-01	2006	60	248	1	星擬修例口交肛交非刑事化	1
YD2006-071	News	Events	Overseas	Celebrity	2006-11-11	2006-11-05	2006-11-01	2006	58	242, 243	2	「Keep a Child Alive」 a party that aims to support children in Africa	2.2
YD2006-070	News	HIV Education and Awareness	HK	General Public	2006-11-15	2006-11-12	2006-11-01	2006	57	229	1	美慈推動的保健活動，透過遊戲教學生認識愛滋病	1
SYT2006-050	News	HIV Treatment	Overseas	PLHIV	2006-11-15	2006-11-12	2006-11-01	2006	40	228	1	New HIV antibody is discovered	2.2
YD2006-068	News	Events	HK	MSM	2006-11-16	2006-11-12	2006-11-01	2006	24	226	1	Edison有意挑戰同性戀電影	1
SYT2006-053	News	HIV Vaccine	HK	PLHIV	2006-11-18	2006-11-12	2006-11-01	2006	43	223	1	HIV Vaccine is effective in animal test	1
SYT2006-052	News	Celebrities	Overseas	General public	2006-11-21	2006-11-19	2006-11-01	2006	42	210	1	Celebrity(Bono) claiming government raise HIV fund	1
YD2006-067	News	HIV Transmission and Risks	Mainland	PLHIV	2006-11-21	2006-11-19	2006-11-01	2006	55	208	1	醫護疑遭愛滋孕婦感染	2.2
YD2006-065	News	HIV Surveillance	HK	PLHIV	2006-11-22	2006-11-19	2006-11-01	2006	53	201-203	3	愛滋感染第三季增96人	2.2
YD2006-066	News	HIV Treatment	Overseas	PLHIV	2006-11-22	2006-11-19	2006-11-01	2006	54	207	1	日利用鼠製成愛滋病毒抗體	2.2
SYT2006-041	News	HIV surveillance	Mainland China	PLHIV	2006-11-23	2006-11-19	2006-11-01	2006	35	196-198,200	4	HIV surveillance results in Mainland China	2.2
YD2006-063	News	Events	HK	General Public	2006-11-24	2006-11-19	2006-11-01	2006	60	186, 190	2	買沐浴啫喱donate money to AIDS patients	1
SYT2006-047	News	HIV Prevention	Overseas	PLHIV	2006-11-24	2006-11-19	2006-11-01	2006	39	183,193,194	3	Catholicism allowing HIV patients use condoms	2.2
SYT2006-046	News	HIV surveillance	Mainland China	PLHIV	2006-11-24	2006-11-19	2006-11-01	2006	38	182,184	2	HIV surveillance results in Shenzhen	2.2
YD2006-059	News	HIV Transmission and Risks	HK	PLHIV	2006-11-24	2006-11-19	2006-11-01	2006	56	180	1	內地來港產子 游走公私立醫院愛滋孕婦失蹤	1
SYT2006-044	News	HIV transmission or risk	Mainland China	General public	2006-11-24	2006-11-19	2006-11-01	2006	37	181	1	HIV transmission situation in Mainland China	2.2
YD2006-058	News	Events	Overseas	Celebrity	2006-11-26	2006-11-26	2006-11-01	2006	55	174	1	夢幻組合 raised fund for AIDS patients	1
SYT2006-042	News	HIV Transmission and Risks	Mainland China	General public-officials	2006-11-27	2006-11-26	2006-11-01	2006	36	170	1	Chinese officials is HIV high risk group	2.2
YD2006-056	News	Events	Taiwan	PLHIV	2006-11-28	2006-11-26	2006-11-01	2006	53	167	1	台賣淫接萬客印尼妹染愛滋	1
SYT2006-040	News	HIV surveillance	Mainland China	PLHIV	2006-11-28	2006-11-26	2006-11-01	2006	35	166	1	HIV surveillance results in Mainland China	2.2
YD2006-051	News	Events	Mainland	General Public	2006-11-29	2006-11-26	2006-11-01	2006	48	155, 157	2	穗新招教路防愛滋	1
YD2006-054	News	Events	Overseas	MSM	2006-11-29	2006-11-26	2006-11-01	2006	51	161	1	富圖恩(declaring himself as a gay)的荷蘭寓言	1
YD2006-050	News	Events	HK	Celebrity	2006-11-29	2006-11-26	2006-11-01	2006	47	154	1	𠝹女王變身愛滋大使	2.2
SYT2006-037	News	HIV prevention	Mainland China	General public-prostitutes	2006-11-29	2006-11-26	2006-11-01	2006	34	156-159	4	HIV prevention promotion in prostitutes	1
YD2006-052	News	HIV Surveillance	Mainland	PLHIV	2006-11-29	2006-11-26	2006-11-01	2006	49	158, 159	2	防治愛滋遭遇法律尷尬	1
YD2006-053	News	HIV Test	Overseas	PLHIV	2006-11-29	2006-11-26	2006-11-01	2006	50	160	1	法國醫院涉誤診孕婦患愛滋	1
SYT2006-035	News	HIV testing	HK	General public	2006-11-29	2006-11-26	2006-11-01	2006	32	153,155	2	HIV tests conducted by AIDS Concern	2.2
YD2006-047	News	HIV Science	Overseas	PLHIV	2006-11-30	2006-11-26	2006-11-01	2006	44	145	1	愛滋病毒藏身睪丸	2.2
YD2006-048	News	HIV Test	Mainland	PLHIV	2006-11-30	2006-11-26	2006-11-01	2006	45	146	1	誤診有愛滋婦擬追究	1
YD2006-044	News	HIV Surveillance	HK	MSM	2006-12-01	2006-11-26	2006-12-01	2006	41	137	1	愛滋男同志年增四成	2.2
YD2006-046	News	HIV Transmission and Risks	HK	General Public	2006-12-01	2006-11-26	2006-12-01	2006	43	139, 140	2	43%嫖客不安全性行為	1
SYT2006-029	Editorial	HIV transmission or risk	HK	General public	2006-12-01	2006-11-26	2006-12-01	2006	27	136	1	HIV transmission situation in HK for 25 years	2.2
SYT2006-032	News	HIV Treatment	HK	PLHIV	2006-12-01	2006-11-26	2006-12-01	2006	29	138,140	2	Life of HIV patients	1
SYT2006-033	News	Surveys	Mainland China	MSM	2006-12-01	2006-11-26	2006-12-01	2006	30	141,142	2	Almost half MSM are highly educated	1
YD2006-045	News	Surveys	HK	MSM	2006-12-01	2006-11-26	2006-12-01	2006	42	138	1	男同性戀者近半高學歷	1
SYT2006-024	News	Event	HK	Homosexuals	2006-12-02	2006-11-26	2006-12-01	2006	22	124	1	Anti-discrimination homosexuals parade	1
SYT2006-027	News	Event	HK	General public-Sex workers concern group	2006-12-02	2006-11-26	2006-12-01	2006	25	128	1	HIV prevention promotion activity	1
YD2006-038	News	Events	HK	Homosexuals	2006-12-02	2006-11-26	2006-12-01	2006	35	124	1	稱驅魔可醫同性戀協會捱轟 18團體促民政局逐協會出論壇	1
YD2006-037	News	Events	Mainland	PLHIV	2006-12-02	2006-11-26	2006-12-01	2006	34	123	1	愛滋婦誕男嬰	2.2
YD2006-040	News	Events	Mainland	PLHIV	2006-12-02	2006-11-26	2006-12-01	2006	37	126	1	溫總邀愛滋孤雛訪中南海	2.2
YD2006-041	News	Events	HK	General Public	2006-12-02	2006-11-26	2006-12-01	2006	38	127, 128	2	「世界愛滋病日」活動	2.2
YD2006-042	News	Events	HK	Celebrity	2006-12-02	2006-11-26	2006-12-01	2006	39	131, 132, 134	3	世界愛滋病日2006活動開展禮」	2.2
YD2006-039	News	HIV Prevention	Mainland	General Public	2006-12-02	2006-11-26	2006-12-01	2006	36	125	1	深圳肇慶娛場宣傳戴套	1
SYT2006-021	Editorial	HIV Prevention	Mainland China	General public	2006-12-02	2006-11-26	2006-12-01	2006	19	121	1	HIV prevention is emergency	2.2
SYT2006-022	News	Others-homosexuals science	HK	Homosexuals	2006-12-02	2006-11-26	2006-12-01	2006	20	122	1	Basic science of homosexuals	2.2
YD2006-034	News	Events	HK	PLHIV	2006-12-03	2006-12-03	2006-12-01	2006	31	110	1	「同志」愛滋病患者 愛的抱抱	1
YD2006-033	News	Events	Mainland	Celebrity	2006-12-04	2006-12-03	2006-12-01	2006	30	105	1	李宇春關懷愛滋	2.2
SYT2006-018	News	HIV prevention	HK	General public	2006-12-05	2006-12-03	2006-12-01	2006	16	99	1	There is no food therapy for HIV prevention	2.2
SYT2006-019	News	HIV Treatment	Overseas	PLHIV	2006-12-05	2006-12-03	2006-12-01	2006	17	100,101	2	New anti-HIV material	2.2
YD2006-029	News	Events	Overseas	PLHIV	2006-12-06	2006-12-03	2006-12-01	2006	26	95	1	Magic Johnson and AIDS	1
YD2006-030	News	Events	HK	General Public	2006-12-06	2006-12-03	2006-12-01	2006	27	98	1	The level that HK people accept AIDS patients	1
SYT2006-017	News	HIV testing	HK	General public- delivery women	2006-12-06	2006-12-03	2006-12-01	2006	15	94	1	Delivery women who from Mainland China need HIV tests	2.2
YD2006-027	News	Events	HK	MSM	2006-12-07	2006-12-03	2006-12-01	2006	24	90, 91	2	Edison有意挑戰同性戀電影	1
YD2006-026	News	HIV Transmission and Risks	Overseas	PLHIV	2006-12-07	2006-12-03	2006-12-01	2006	23	89	1	剖腹產子減母嬰傳染愛滋	2.2
SYT2006-015	News	Sex-related crime	HK	MSM	2006-12-08	2006-12-03	2006-12-01	2006	13	87	1	MSM commiting a crime.	1
YD2006-024	News	Events	HK	MSM	2006-12-09	2006-12-03	2006-12-01	2006	21	86	1	MSM	1
YD2006-025	News	Events	Mainland	MSM	2006-12-09	2006-12-03	2006-12-01	2006	22	87	1	同志包養拾荒者狎玩被殺	1
YD2006-023	News	Surveys	Mainland	General Public	2006-12-12	2006-12-10	2006-12-01	2006	20	71, 72, 76, 77	4	逾半深圳人認同一夜情	1
YD2006-021	News	HIV Education and Awareness	Overseas	Celebrity	2006-12-13	2006-12-10	2006-12-01	2006	18	67	1	Rain勁歌熱舞抗愛滋	2.2
YD2006-022	News	Surveys	HK	General Public	2006-12-13	2006-12-10	2006-12-01	2006	19	71	1	12% men in HK have sex with whores and among these men there are 28% men didn't use condems	1
SYT2006-013	News	Social Issues	Overseas	PLHIV	2006-12-14	2006-12-10	2006-12-01	2006	11	66	1	4-year old child infected HIV was kicked out of school	1
YD2006-018	News	HIV Surveillance	HK	MSM	2006-12-15	2006-12-10	2006-12-01	2006	15	54-58	5	愛滋男同志快速播毒	2.2
YD2006-019	News	HIV Transmission and Risks	HK	General Public-Males	2006-12-15	2006-12-10	2006-12-01	2006	16	59, 60	2	攞割咗同未割包皮嘅男子嚟比較，前者感染愛滋嘅風險低一半	2.2
YD2006-020	News	Policy and Law	HK	PLHIV	2006-12-15	2006-12-10	2006-12-01	2006	17	63	1	港無傳播病毒判囚例	1
SYT2006-012	News	Policy and Laws	Overseas	PLHIV	2006-12-15	2006-12-10	2006-12-01	2006	10	63	1	Transmitting HIV deliberately is illegal	1
SYT2006-007	News	Social Issues	Mainland China	PLHIV	2006-12-17	2006-12-17	2006-12-01	2006	6	51	1	HIV patients committing a crime because no laws restricts them	2.2
YD2006-016	News	Events	Overseas	Celebrity	2006-12-19	2006-12-17	2006-12-01	2006	16	47	1	文根英高歌助AIDS兒童	1
SYT2006-006	News	Social Issues	Mainland China	PLHIV	2006-12-19	2006-12-17	2006-12-01	2006	6	44	1	HIV patients committing a crime because no laws restricts them	2.2
SYT2006-009	News	Social Issues	Overseas	Homosexuals	2006-12-19	2006-12-17	2006-12-01	2006	7	45,50	2	Homosexuals divergence in 美聖公會	2.2
SYT2006-004	News	HIV prevention	Mainland China	General public-secondary school students	2006-12-20	2006-12-17	2006-12-01	2006	4	40	1	Beijing secondary school promoting HIV prevention textbooks	2.2
SYT2006-005	News	HIV-related crime	Overseas	General public-children	2006-12-20	2006-12-17	2006-12-01	2006	5	41,43	2	Nurses transmitting HIV to children deliberately	2.2
YD2006-010	News	HIV Transmission and Risks	HK	General Public	2006-12-21	2006-12-17	2006-12-01	2006	10	35	1	買網上二手隱形眼鏡隨時染愛滋	1
YD2006-011	News	HIV Transmission and Risks	HK	General Public	2006-12-21	2006-12-17	2006-12-01	2006	11	37	1	攞割咗同未割包皮嘅男子嚟比較，前者感染愛滋嘅風險低一半	1
YD2006-009	News	Events	Overseas	Celebrity	2006-12-22	2006-12-17	2006-12-01	2006	9	31	1	祖廸羅、莎廸及兒女已抵達南非城市彼得馬里茨（Pietermaritzburg）一間名為「God's Golden Acre」的慈善機構，探訪該院逾200名愛滋孤兒	1
YD2006-007	News	Events	HK	PLHIV	2006-12-24	2006-12-24	2006-12-01	2006	7	23	1	至hit人物：辭去高薪厚職幫助內地愛滋遺孤	2.2
YD2006-008	News	HIV Transmission and Risks	HK	General Public	2006-12-24	2006-12-24	2006-12-01	2006	8	25, 27	2	六成青少年佳節易濫藥	1
SYT2006-002	News	HIV prevention	HK	General public	2006-12-25	2006-12-24	2006-12-01	2006	2	21	1	We should watch out neck macula to prevent HIV	2.2
YD2006-006	News	HIV Transmission and Risks	HK	General Public	2006-12-25	2006-12-24	2006-12-01	2006	6	22	1	援助交際節日	1
SYT2006-001	News	HIV prevention	HK	General public	2006-12-27	2006-12-24	2006-12-01	2006	1	16	1	Teenager sisters promoting HIV prevention	2.2
YD2006-003	News	Events	HK	MSM	2006-12-29	2006-12-24	2006-12-01	2006	3	10	1	Q and A with gay	1
YD2006-002	News	Social Issues	HK	Homosexuals	2006-12-30	2006-12-24	2006-12-01	2006	2	3	1	The legalization of homosexual in HK	1
YD2006-001	News	Events	Overseas	MSM	2006-12-31	2006-12-31	2006-12-01	2006	1	1	1	Two officials in US were claimed that they were related with MSM	1
SYT2007-212	News	HIV Prevention	Overseas	General public-female	2007-01-02	2006-12-31	2007-01-01	2007	155	1491	1	Liquid condom can prevent HIV for female	2.2
SYT2007-149	News	Others-volunteers	Mainland China	PLHIV	2007-01-06	2006-12-31	2007-01-01	2007	114	1477	1	Outstanding volunteer 高耀潔	1
SYT2007-211	News	Social Issues	Overseas	MSM	2007-01-06	2006-12-31	2007-01-01	2007	154	1478	1	MSM writer was accepted by the Vatican	2.2
YD2007-273	News	HIV-related crime	HK	MSM	2007-01-13	2007-01-07	2007-01-01	2007	235	1149, 1451	2	愛滋男同志燒炭同伴涉謀殺	1
YD2007-275	News	Policy and Laws	Mainland	MSM	2007-01-13	2007-01-07	2007-01-01	2007	237	1452	1	同性戀comitted prostution亦可被判刑	1
YD2007-272	TV Series	Others-homosexuals related TV series	HK	Homosexuals	2007-01-21	2007-01-21	2007-01-01	2007	208	1430-1434	5	《同志．戀人》 homosexuals related TV series raised big issue	2.2
SYT2007-182	News	Social Issues	HK	Homosexuals	2007-01-22	2007-01-21	2007-01-01	2007	131	1423,1426,1428	3	Broadcasting Bureau's discrimination to homosexuals was protested	1
SYT2007-210	News	Events	HK	Homosexuals	2007-01-22	2007-01-21	2007-01-01	2007	153	1430	1	Homosexuals works exhibition	1
YD2007-271	TV Series	Others-homosexuals related TV series	HK	Homosexuals	2007-01-22	2007-01-21	2007-01-01	2007	208	1423, 1424, 1426, 1428	4	《同志．戀人》 homosexuals related TV series raised big issue	2.2
SYT2007-181	News	Social Issues	HK	Homosexuals	2007-01-23	2007-01-21	2007-01-01	2007	131	1421	1	Broadcasting Bureau's discrimination to homosexuals was protested	1
SYT2007-209	News	Social Issues	Mainland China	Homosexuals	2007-01-23	2007-01-21	2007-01-01	2007	152	1417	1	Female homosexuals hot line in Shanghai	1
YD2007-269	News	HIV Transmission and Risks	HK	PLHIV	2007-01-23	2007-01-21	2007-01-01	2007	234	1416	1	遇害妓女疑有帶菌者惹愛滋香腸恐慌	1
YD2007-270	TV Series	Others-homosexuals related TV series	HK	Homosexuals	2007-01-23	2007-01-21	2007-01-01	2007	208	1418, 1419, 1420, 1421	4	《同志．戀人》 homosexuals related TV series raised big issue	1
SYT2007-180	News	Others-homosexuals related TV series	HK	Homosexuals	2007-01-24	2007-01-21	2007-01-01	2007	131	1407,1409	2	Broadcasting Bureau's discrimination to homosexuals was protested	2.2
SYT2007-179	News	Others-homosexuals related TV series	HK	Homosexuals	2007-01-25	2007-01-21	2007-01-01	2007	131	1401,1402,1403,1405	4	Broadcasting Bureau's discrimination to homosexuals was protested	2.2
SYT2007-208	News	HIV transmission or risk	HK	General public-Truck drivers	2007-01-26	2007-01-21	2007-01-01	2007	151	1397	1	Truck drivers between HK and Mainland China is HIV high risk group	2.2
SYT2007-178	News	Social Issues	HK	Homosexuals	2007-01-27	2007-01-21	2007-01-01	2007	131	1393,1394,1394	3	Broadcasting Bureau's discrimination to homosexuals was protested	2.2
SYT2007-177	News	Social Issues	HK	Homosexuals	2007-01-29	2007-01-28	2007-01-01	2007	131	1382,1383,1385	3	Broadcasting Bureau's discrimination to homosexuals was protested	2.2
SYT2007-203	News	HIV transmission or risk	HK	General public	2007-01-30	2007-01-28	2007-01-01	2007	146	1376	1	2 HIV-infected Vietnamese commiting a crime in HK	1
SYT2007-176	News	Social Issues	HK	Homosexuals	2007-01-30	2007-01-28	2007-01-01	2007	131	1375,1378,1381	3	Broadcasting Bureau's discrimination to homosexuals was protested	2.2
SYT2007-207	News	Surveys	HK	General public	2007-01-30	2007-01-28	2007-01-01	2007	150	1374	1	Citizen's awareness of HIV is decreasing	2.2
YD2007-261	News	Events	HK	Homosexuals	2007-01-31	2007-01-28	2007-01-01	2007	208	1369	1	抨擊廣管局令人遺憾	1
SYT2007-175	News	Social Issues	HK	Homosexuals	2007-02-01	2007-01-28	2007-02-01	2007	131	1367	1	Broadcasting Bureau's discrimination to homosexuals was protested	2.2
YD2007-259	News	HIV-related crime	HK	PLHIV	2007-02-01	2007-01-28	2007-02-01	2007	231	1362, 1363, 1365	3	AIDS patients from Vietnam came to HK in order to get treatment	2.2
YD2007-256	News	Events	Overseas	Celebrity	2007-02-02	2007-01-28	2007-02-01	2007	227	1352	1	美國愛滋病研究中心（amfAR ）舉辦的年度慈善晚宴前晚在紐約舉行	1
YD2007-258	News	Social Issue	HK	MSM	2007-02-02	2007-01-28	2007-02-01	2007	230	1359	1	男風危害健康	1
YD2007-257	News	HIV-related crime	HK	PLHIV	2007-02-02	2007-01-28	2007-02-01	2007	211	1353-1355, 1358	4	AIDS patients from Vietnam came to HK in order to get treatment	2.2
SYT2007-200	News	HIV-related crime	HK	General public	2007-02-03	2007-01-28	2007-02-01	2007	146	1347,1351	2	2 HIV-infected Vietnamese commiting a crime in HK	2.2
SYT2007-206	News	Policy and Laws	Overseas	Homosexuals	2007-02-03	2007-01-28	2007-02-01	2007	149	1350	1	Same sex marriage(laws), spanned several countries	2.2
YD2007-252	News	Events	HK	Homosexuals	2007-02-05	2007-02-04	2007-02-01	2007	223	1332	1	Equally thinking about homosexuals	1
YD2007-253	News	HIV Prevention	Mainland	General Public	2007-02-05	2007-02-04	2007-02-01	2007	224	1339	1	衛生部擬規定浴場須備安全套	2.2
YD2007-247	News	Surveys	HK	MSM	2007-02-06	2007-02-04	2007-02-01	2007	220	1317	1	The development of MSM	1
YD2007-251	News	Events	HK	Homosexuals	2007-02-06	2007-02-04	2007-02-01	2007	222	1324	1	民政局讓一個專門把同性戀者「由攣拗直」的組織加入性小眾論壇	1
SYT2007-150	News	Others-volunteers	Mainland China	PLHIV	2007-02-06	2007-02-04	2007-02-01	2007	114	1315,1320,1322	3	Outstanding volunteer 高耀潔	2.2
SYT2007-174	News	Social Issues	HK	Homosexuals	2007-02-06	2007-02-04	2007-02-01	2007	131	1318,1327	2	Broadcasting Bureau's discrimination to homosexuals was protested	2.2
SYT2007-198	News	HIV surveillance	Mainland China	PLHIV	2007-02-06	2007-02-04	2007-02-01	2007	145	1316	1	HIV surveillance results in Mainland China	2.2
SYT2007-199	News	HIV-related crime	HK	General public	2007-02-06	2007-02-04	2007-02-01	2007	146	1319,1325	2	2 HIV-infected Vietnamese commiting a crime in HK	2.2
YD2007-250	News	HIV Science	Overseas	PLHIV	2007-02-06	2007-02-04	2007-02-01	2007	221	1321, 1323, 1326	3	美國出現新型愛滋病病毒	2.2
YD2007-244	News	Events	HK	Homosexuals	2007-02-07	2007-02-04	2007-02-01	2007	217	1310	1	男風與對食	1
YD2007-243	TV Series	Others-MSM related movie, TV series or dramas	HK	Homosexuals	2007-02-08	2007-02-04	2007-02-01	2007	216	1304	1	Review about TV reporting on homosexuals	1
SYT2007-197	News	HIV transmission or risk	Overseas	General public-patients in hospital	2007-02-09	2007-02-04	2007-02-01	2007	144	1298	1	97 patients may be infected HIV in hospital	2.2
YD2007-241	News	HIV Prevention	Overseas	General Public	2007-02-13	2007-02-11	2007-02-01	2007	214	1290	1	巴西狂歡嘉年華 distribute condoms in order to prevent AIDS	1
SYT2007-196	News	Events	Overseas	Celebrity	2007-02-14	2007-02-11	2007-02-01	2007	143	1286	1	Celebrity(波歷克) promoting HIV prevention	1
YD2007-240	News	HIV Education and Awareness	Overseas	Celebrity	2007-02-14	2007-02-11	2007-02-01	2007	213	1284	1	Rain刺激愛滋病手帶銷量	1
SYT2007-194	News	hiv transmission or risk	HK	PLHIV	2007-02-15	2007-02-11	2007-02-01	2007	141	1279	1	13 HIV-infected Vietnamese were repatriated	2.2
SYT2007-195	News	Surveys	HK	Homosexuals	2007-02-15	2007-02-11	2007-02-01	2007	142	1280	1	30% homosexuals said they were not protected	2.2
SYT2007-148	News	Others-volunteers	Mainland China	PLHIV	2007-02-16	2007-02-11	2007-02-01	2007	114	1274	1	Outstanding volunteer 高耀潔	1
SYT2007-193	News	HIV Vaccine	Overseas	General public	2007-02-16	2007-02-11	2007-02-01	2007	140	1275,1276	2	HIV vaccine research making process	2.2
SYT2007-173	News	Social Issues	HK	Homosexuals	2007-02-17	2007-02-11	2007-02-01	2007	131	1269,1270,1271,1272	4	Broadcasting Bureau's discrimination to homosexuals was protested	2.2
SYT2007-147	News	Others-volunteers	Mainland China	PLHIV	2007-02-18	2007-02-18	2007-02-01	2007	114	1263	1	Outstanding volunteer 高耀潔	1
SYT2007-172	News	Social Issues	HK	Homosexuals	2007-02-18	2007-02-18	2007-02-01	2007	131	1264,1266	2	Broadcasting Bureau's discrimination to homosexuals was protested	2.2
SYT2007-192	News	HIV Treatment	Overseas	PLHIV	2007-02-18	2007-02-18	2007-02-01	2007	139	1262,1265	2	Generic HIV medicine decreasing price of treatment	2.2
SYT2007-191	News	HIV transmission or risk	Overseas	General public-patients who were transferred organs	2007-02-22	2007-02-18	2007-02-01	2007	138	1252,1253,1256	3	Three given HIV-infected organs in Italy	2.2
SYT2007-190	News	HIV Treatment	Overseas	PLHIV	2007-02-23	2007-02-18	2007-02-01	2007	137	1249,1250	2	New HIV medicine	2.2
SYT2007-146	News	Others-volunteers	Mainland China	PLHIV	2007-02-24	2007-02-18	2007-02-01	2007	114	1244,1245	2	Outstanding volunteer 高耀潔	1
SYT2007-084	News	HIV Prevention	Overseas	General public-male	2007-02-25	2007-02-25	2007-02-01	2007	69	1243	1	Circumcision decreasing HIV infection risk	1
SYT2007-145	News	Others-volunteers	Mainland China	PLHIV	2007-02-26	2007-02-25	2007-02-01	2007	114	1239	1	Outstanding volunteer 高耀潔	1
SYT2007-144	News	Others-volunteers	Mainland China	PLHIV	2007-02-27	2007-02-25	2007-02-01	2007	114	1234	1	Outstanding volunteer 高耀潔	1
YD2007-231	Movies	Others-AIDS related movie, TV series or dramas	Overseas	PLHIV	2007-02-27	2007-02-25	2007-02-01	2007	114	1232, 1235	2	《潁州的孩子》AIDS orphans related movies	2.2
SYT2007-166	News	HIV surveillance	HK	PLHIV	2007-02-28	2007-02-25	2007-02-01	2007	127	1221,1223,1224	3	HIV infection increasing 19% last year	2.2
SYT2007-143	News	Others-volunteers	Mainland China	PLHIV	2007-03-01	2007-02-25	2007-03-01	2007	114	1215	1	Outstanding volunteer 高耀潔	1
YD2007-228	News	HIV Education and Awareness	Mainland	PLHIV	2007-03-01	2007-02-25	2007-03-01	2007	203	1215	1	AIDS in Mainland	1
YD2007-229	News	Policy and Law	Overseas	Homosexuals	2007-03-01	2007-02-25	2007-03-01	2007	204	1217	1	軍方對同志「不問不說」	1
YD2007-227	News	MSM-related crime	HK	MSM	2007-03-02	2007-02-25	2007-03-01	2007	202	1212, 1213, 1214	3	同性戀鋼琴教師非禮男生判囚4年	2.2
SYT2007-142	News	Others-volunteers	Mainland China	PLHIV	2007-03-03	2007-02-25	2007-03-01	2007	114	1207,1209	2	Outstanding volunteer 高耀潔	1
YD2007-226	News	HIV Prevention	Overseas	General Public	2007-03-03	2007-02-25	2007-03-01	2007	201	1210	1	愛滋病熱線變色情電話	1
SYT2007-141	News	Others-volunteers	Mainland China	PLHIV	2007-03-05	2007-03-04	2007-03-01	2007	114	1197	1	Outstanding volunteer 高耀潔	1
SYT2007-185	News	Social Issues	Mainland China	PLHIV	2007-03-05	2007-03-04	2007-03-01	2007	133	1196	1	HIV influenced orphans	2.2
YD2007-225	News	Events	Overseas	Homosexuals	2007-03-05	2007-03-04	2007-03-01	2007	200	1198	1	澳洲悉尼舉行2007年同性戀大巡遊	2.2
YD2007-223	News	Policy and Law	HK	MSM	2007-03-07	2007-03-04	2007-03-01	2007	198	1185, 1186	2	制訂五年策略嚴控愛滋病 男男性接觸列防愛滋重點	2.2
YD2007-219	News	HIV Treatment	HK	PLHIV	2007-03-13	2007-03-11	2007-03-01	2007	195	1156	1	外地居民不能享免費愛滋治療	1
YD2007-222	Movies	Others-AIDS related movie, TV series or dramas	Overseas	PLHIV	2007-03-13	2007-03-11	2007-03-01	2007	114	1162	1	《潁州的孩子》AIDS orphans related movies	2.2
SYT2007-170	News	HIV testing	HK	General public	2007-03-13	2007-03-11	2007-03-01	2007	130	1155,1156,1158,1159,1161	5	Someone claiming to provide free HIV tests to nonlocal	2.2
SYT2007-171	News	Social Issues	HK	Homosexuals	2007-03-13	2007-03-11	2007-03-01	2007	131	1157,1165,1169	3	Broadcasting Bureau's discrimination to homosexuals was protested	2.2
SYT2007-184	News	HIV transmission or risk	Overseas	PLHIV	2007-03-13	2007-03-11	2007-03-01	2007	132	1160	1	HIV patients dating website	2.2
YD2007-217	News	HIV Prevention	HK	MSM	2007-03-14	2007-03-11	2007-03-01	2007	193	1151	1	2006年愛滋感染個案飆升近兩成，更有專家指出，香港只有六成男同志使用安全套，所以衛生署明言，將於男同性戀社群中大力宣傳「安全套教育」	2.2
SYT2007-140	News	Others-volunteers	Mainland China	PLHIV	2007-03-16	2007-03-11	2007-03-01	2007	114	1143,1144,1146	3	Outstanding volunteer 高耀潔	1
YD2007-216	News	HIV Test	HK	General Public	2007-03-17	2007-03-11	2007-03-01	2007	192	1138	1	倡產房快速測試驗愛滋	2.2
YD2007-215	News	Events	HK	General Public	2007-03-18	2007-03-18	2007-03-01	2007	191	1135	1	「關心愛滋行動」	1
SYT2007-165	News	HIV surveillance	HK	PLHIV	2007-03-18	2007-03-18	2007-03-01	2007	127	1134	1	HIV infection increasing 19% last year	2.2
SYT2007-164	News	HIV transmission or risk	Overseas	General public-druggers	2007-03-19	2007-03-18	2007-03-01	2007	126	1133	1	HIV transmission in India via drug	1
YD2007-212	News	HIV Test	Mainland	General Public	2007-03-21	2007-03-18	2007-03-01	2007	188	1120	1	醫院掠水女童擦傷要驗愛滋	1
YD2007-213	News	HIV Science	Overseas	General Public	2007-03-21	2007-03-18	2007-03-01	2007	189	1126	1	愛滋病毒治囊腫性纖維化	1
SYT2007-139	News	Others-volunteers	Mainland China	PLHIV	2007-03-22	2007-03-18	2007-03-01	2007	114	1117	1	Outstanding volunteer 高耀潔	2.2
YD2007-209	News	HIV Prevention	HK	MSM	2007-03-23	2007-03-18	2007-03-01	2007	185	1110	1	Government and public should not just claim that MSM have high risks in being infected with HIV.	1
SYT2007-163	News	Sex-related crime	HK	MSM	2007-03-23	2007-03-18	2007-03-01	2007	125	1111,1115	2	Officer commiting a crime to a child	2.2
SYT2007-162	News	Social Issues	HK	PLHIV	2007-03-26	2007-03-25	2007-03-01	2007	124	1103	1	Discrimination to HIV patients	1
YD2007-208	News	MSM-related crime	HK	MSM	2007-03-26	2007-03-25	2007-03-01	2007	184	1011	1	偷拍交歡俊男勒索同志	2.2
SYT2007-160	News	Sex-related crime	HK	MSM	2007-03-27	2007-03-25	2007-03-01	2007	122	1093,1094,1095	3	Student commiting a crime	2.2
SYT2007-132	News	Events	Overseas	Homosexuals	2007-03-28	2007-03-25	2007-03-01	2007	108	1089	1	GLAAD Media Awards	1
SYT2007-083	News	HIV Prevention	Overseas	General public-male	2007-03-30	2007-03-25	2007-03-01	2007	69	1080	1	Circumcision decreasing HIV infection risk	1
SYT2007-159	News	Sex-related crime	HK	MSM	2007-03-30	2007-03-25	2007-03-01	2007	122	1084	1	Student commiting a crime	1
YD2007-202	News	HIV Prevention	Overseas	General Public	2007-03-30	2007-03-25	2007-03-01	2007	124	1080	1	包皮環切降低染愛滋風險	1
YD2007-205	News	Events	HK	MSM	2007-03-30	2007-03-25	2007-03-01	2007	181	1084	1	準會考生被控與少年肛交	1
YD2007-206	News	Events	Overseas	Homosexuals	2007-03-30	2007-03-25	2007-03-01	2007	182	1089	1	第18屆同性戀反歧視聯盟傳媒頒獎禮	1
YD2007-203	News	Events	HK	PLHIV	2007-03-30	2007-03-25	2007-03-01	2007	180	1081	1	銀行送書包助愛滋病童	2.2
YD2007-204	News	HIV Science	Overseas	PLHIV	2007-03-30	2007-03-25	2007-03-01	2007	177	1082, 1088	2	綠茶可紓解愛滋病病情	2.2
SYT2007-157	News	HIV surveillance	HK	PLHIV	2007-03-31	2007-03-25	2007-03-01	2007	120	1075	1	HIV surveillance results in HK	2.2
YD2007-200	News	HIV Transmission and Risks	Overseas	PLHIV	2007-04-02	2007-04-01	2007-04-01	2007	178	1071	1	愛滋病婦餵母乳 嬰兒染HIV機會低	2.2
YD2007-199	News	HIV Science	Overseas	PLHIV	2007-04-03	2007-04-01	2007-04-01	2007	177	1067	1	綠茶可紓解愛滋病病情	2.2
SYT2007-153	News	Others-TV program	Mainland China	Homosexuals	2007-04-04	2007-04-01	2007-04-01	2007	117	1062	1	First TV program entitled "同性相連"	2.2
SYT2007-152	News	HIV surveillance	Mainland China	PLHIV	2007-04-06	2007-04-01	2007-04-01	2007	116	1058	1	HIV infection increasing 60% in Shenzhen	1
SYT2007-151	News	Events	Overseas	Homosexuals	2007-04-07	2007-04-01	2007-04-01	2007	115	1055	1	Same sex wedding in Disney	1
YD2007-197	News	HIV Transmission and Risks	HK	General Public	2007-04-07	2007-04-01	2007-04-01	2007	175	1052, 1053	2	遭血水針筒刺傷男童驗愛滋	1
SYT2007-138	News	Others-volunteers	Mainland China	PLHIV	2007-04-07	2007-04-01	2007-04-01	2007	114	1051	1	Outstanding volunteer 高耀潔	2.2
SYT2007-137	News	HIV Prevention	Taiwan	General public	2007-04-08	2007-04-08	2007-04-01	2007	113	1050	1	HIV prevention measures in Taiwan	1
SYT2007-136	News	HIV transmission or risk	Mainland China	General public-children	2007-04-09	2007-04-08	2007-04-01	2007	112	1049	1	HIV infection via blood transfusion	1
SYT2007-135	News	Events	Overseas	Celebrities	2007-04-10	2007-04-08	2007-04-01	2007	111	1043	1	AIDS concern large dancing party	1
SYT2007-133	News	HIV Vaccine	Overseas	General Public	2007-04-12	2007-04-08	2007-04-01	2007	109	1037	1	HIV vaccine research making process in France	1
SYT2007-134	News	Sex-related crime	Overseas	PLHIV	2007-04-12	2007-04-08	2007-04-01	2007	110	1040	1	HIV infected man commiting a crime	1
YD2007-194	News	HIV Science	Overseas	PLHIV	2007-04-12	2007-04-08	2007-04-01	2007	172	1037	1	愛滋患者淋巴細胞異常	1
YD2007-195	News	Events	Overseas	Celebrity	2007-04-12	2007-04-08	2007-04-01	2007	173	1043	1	扮鬼扮馬關懷愛滋大舞會	1
SYT2007-131	News	Events	Overseas	Homosexuals	2007-04-16	2007-04-15	2007-04-01	2007	108	1028-1030	3	GLAAD Media Awards	1
SYT2007-129	News	HIV Treatment	HK	PLHIV	2007-04-19	2007-04-15	2007-04-01	2007	106	1020	1	HIV medicine research in HKU	2.2
SYT2007-130	News	HIV transmission or risk	Overseas	General public-Hemophilia patients	2007-04-19	2007-04-15	2007-04-01	2007	107	1021	1	Hemophilia patients are transfused with HIV infected blood	2.2
SYT2007-128	News	Others-volunteers	Mainland China	PLHIV	2007-04-21	2007-04-15	2007-04-01	2007	105	1016	1	Volunteer 高耀潔 are house arrested	1
SYT2007-127	News	Events	HK	Homosexuals	2007-04-21	2007-04-15	2007-04-01	2007	104	1013	1	Homosexuals organization protesting Civil Affairs Bureau	2.2
YD2007-190	News	Surveys	Overseas	MSM	2007-04-23	2007-04-22	2007-04-01	2007	168	1004	1	雙性戀者九成九係單性戀	2.2
SYT2007-125	News	Policy and Laws	Overseas	Homosexuals	2007-04-24	2007-04-22	2007-04-01	2007	102	1001	1	李光耀 claiming homosexuals should not be criminal	2.2
YD2007-188	News	Events	Overseas	Celebrity	2007-04-25	2007-04-22	2007-04-01	2007	166	996	1	亨利王子愛滋基金	2.2
SYT2007-123	News	HIV testing	Overseas	General public	2007-04-27	2007-04-22	2007-04-01	2007	100	988	1	HIV tests for the whole people	2.2
YD2007-186	News	Events	Overseas	MSM	2007-05-03	2007-04-29	2007-05-01	2007	164	964, 966, 968	3	英國石油CEO涉同性戀	1
SYT2007-122	News	HIV Prevention	Overseas	General public	2007-05-03	2007-04-29	2007-05-01	2007	99	963	1	Condom theme bar in India	2.2
SYT2007-121	News	Events	Overseas	Celebrities	2007-05-06	2007-05-06	2007-05-01	2007	98	958	1	Charity soccer competition of celebrities	2.2
SYT2007-120	News	HIV Science	Overseas	PLHIV	2007-05-07	2007-05-06	2007-05-01	2007	97	950,955	2	selenium can cure HIV	2.2
SYT2007-119	News	HIV Treatment	Overseas	PLHIV	2007-05-10	2007-05-06	2007-05-01	2007	96	936,937	2	Clinton bringing HIV medicine price down	2.2
YD2007-181	News	Others-MSM related movie, TV series or dramas	Overseas	MSM	2007-05-15	2007-05-13	2007-05-01	2007	159	923, 924	2	美小學播《斷背山》 遭索償390萬	1
YD2007-180	News	Events	Overseas	Celebrity	2007-05-15	2007-05-13	2007-05-01	2007	158	921	1	英國倫敦帕爾摩街Malborough House 上周五晚舉行慈善晚宴	2.2
SYT2007-117	News	Social Issues	HK	MSM	2007-05-16	2007-05-13	2007-05-01	2007	94	914	1	MSM public space is smaller than before	1
SYT2007-116	News	HIV surveillance	HK	PLHIV	2007-05-16	2007-05-13	2007-05-01	2007	93	913	1	Export estimating HIV infection will increase about 3000 in 2020	2.2
SYT2007-114	News	Others-volunteers	HK	PLHIV	2007-05-17	2007-05-13	2007-05-01	2007	91	905	1	Volunteers stewing soup for HIV patients	1
SYT2007-115	News	Others-homosexuality science	Overseas	Homosexuals	2007-05-17	2007-05-13	2007-05-01	2007	92	912	1	Homosexuality is excluded from psychosis	1
YD2007-178	News	Events	HK	Homosexuals	2007-05-21	2007-05-20	2007-05-01	2007	156	894	1	「國際不再恐同日」香港區遊行	2.2
YD2007-177	News	Events	HK	MSM	2007-05-25	2007-05-20	2007-05-01	2007	155	868, 869, 879	3	Yaoming Huang acquieced that he is gay	1
SYT2007-112	News	Events	Overseas	Celebrities	2007-05-25	2007-05-20	2007-05-01	2007	89	867,874,875,880	4	amfAR dinner	2.2
YD2007-175	News	Events	Overseas	Celebrity	2007-05-28	2007-05-27	2007-05-01	2007	153	857	1	莎姐籌款助愛滋病人	2.2
SYT2007-110	News	Social Issues	Overseas	MSM	2007-05-29	2007-05-27	2007-05-01	2007	87	853,856	2	MSM bar rejecting heterosexuals	1
YD2007-174	News	HIV Surveillance	HK	MSM	2007-05-30	2007-05-27	2007-05-01	2007	133	846, 847, 849, 851	4	男男性接觸染愛滋大增	2.2
YD2007-173	News	Events	HK	Celebrity	2007-06-02	2007-05-27	2007-06-01	2007	152	835, 838	2	吳日言 attended the activity of caring about AIDS	1
SYT2007-109	News	Sex-related crime	Overseas	MSM	2007-06-02	2007-05-27	2007-06-01	2007	86	834	1	HIV MSM commiting sex-related crime and delivering HIV deliberately	2.2
YD2007-170	News	Events	Mainland	MSM	2007-06-04	2007-06-03	2007-06-01	2007	149	823	1	男同志情困闢室仰藥	1
YD2007-171	News	HIV Transmission and Risks	Taiwan	PLHIV	2007-06-04	2007-06-03	2007-06-01	2007	150	824	1	注人胎盤美白隨時染愛滋	1
SYT2007-108	News	Social Issues	Overseas	Homosexuals	2007-06-04	2007-06-03	2007-06-01	2007	85	822	1	Marriage website rejecting homosexuals	2.2
SYT2007-106	News	Events	HK	Homosexuals	2007-06-05	2007-06-03	2007-06-01	2007	83	818	1	Marchers calling for legislation to eliminate prejudice against homosexuality	1
YD2007-167	News	Events	Overseas	Celebrity	2007-06-05	2007-06-03	2007-06-01	2007	146	817	1	助Bono救愛滋病人環球片場	2.2
YD2007-168	News	Events	Overseas	MSM	2007-06-05	2007-06-03	2007-06-01	2007	147	819	1	畢彼特 who is gay was asked to help protect a bar from reconstruction that use to be a lovely place for gays	2.2
SYT2007-104	News	HIV Treatment	Overseas	PLHIV	2007-06-08	2007-06-03	2007-06-01	2007	81	806,808,809	3	HIV medicine was polluted	2.2
SYT2007-103	News	HIV transmission or risk	Overseas	PLHIV	2007-06-10	2007-06-10	2007-06-01	2007	80	796,798	2	HIV man transmitting HIV to more than 100 girls	2.2
SYT2007-102	News	HIV transmission or risk	Overseas	PLHIV	2007-06-11	2007-06-10	2007-06-01	2007	80	793	1	HIV man transmitting HIV to more than 100 girls	1
YD2007-163	News	Events	Overseas	MSM	2007-06-13	2007-06-10	2007-06-01	2007	142	784, 785	2	美軍曾考慮「基彈」抗敵	1
YD2007-164	News	Events	HK	PLHIV	2007-06-13	2007-06-10	2007-06-01	2007	143	786	1	吳日言以腳行善 for AIDS patients	1
YD2007-162	News	Events	Overseas	MSM	2007-06-14	2007-06-10	2007-06-01	2007	141	782	1	總統犯「同志罪」	1
YD2007-161	News	Events	HK	PLHIV	2007-06-16	2007-06-10	2007-06-01	2007	140	774	1	案件速遞潛逃18年商人稱患愛滋	1
YD2007-159	News	Events	Overseas	PLHIV	2007-06-18	2007-06-17	2007-06-01	2007	138	766	1	愛滋男女結成夫婦	1
YD2007-160	News	HIV Prevention	HK	General Public	2007-06-18	2007-06-17	2007-06-01	2007	139	767	1	MMM黑色AIDS Calling	1
SYT2007-042	News	Others-TV program	HK	Homosexuals	2007-06-19	2007-06-17	2007-06-01	2007	35	764	1	Homosexuals TV program "鏗鏘集"	1
YD2007-158	News	Events	Mainland	MSM	2007-06-19	2007-06-17	2007-06-01	2007	137	764	1	同志博士生入稟挑戰廣管局	1
SYT2007-094	News	Policy and Laws	HK	MSM	2007-06-26	2007-06-24	2007-06-01	2007	73	746	1	Laws about male sex	2.2
SYT2007-101	News	Social Issues	Mainland China	PLHIV	2007-06-26	2007-06-24	2007-06-01	2007	79	747	1	Hospitals rejecting to conduct operation for a HIV infected child	2.2
YD2007-154	News	Events	Overseas	Celebrity	2007-06-30	2007-06-24	2007-06-01	2007	135	730	1	艾頓莊舉行私人慈善派對for AIDS	1
YD2007-155	News	HIV Transmission and Risks	HK	MSM	2007-06-30	2007-06-24	2007-06-01	2007	133	731	1	全球愛滋病人數不斷上升，近日更有報道香港男同志感染愛滋病近5 年來激增3 倍，據講主要原因是交換性伴侶所致	1
SYT2007-098	News	HIV Surveillance	HK	MSM	2007-07-02	2007-07-01	2007-07-01	2007	77	714	1	HIV infection increasing among MSM	2.2
SYT2007-100	News	HIV surveillance	Others-Macao	PLHIV	2007-07-02	2007-07-01	2007-07-01	2007	78	715	1	HIV surveillance results in Macao	2.2
SYT2007-092	News	Sex-related crime	HK	MSM	2007-07-05	2007-07-01	2007-07-01	2007	72	704,705	2	67-year-old man obscened 22-year-old boy and was killed	2.2
SYT2007-091	News	Sex-related crime	HK	MSM	2007-07-06	2007-07-01	2007-07-01	2007	72	703	1	67-year-old man obscened 22-year-old boy and was killed	1
SYT2007-097	News	HIV Vaccine	Overseas	General public	2007-07-09	2007-07-08	2007-07-01	2007	76	697	1	New HIV vaccine testing successful on monkey	2.2
SYT2007-087	News	Policy and Laws	Overseas	General public-nurses	2007-07-12	2007-07-08	2007-07-01	2007	71	692	1	6 nurses who let more than 600 children infect HIV are sentenced	2.2
SYT2007-096	News	HIV surveillance	Mainland China	PLHIV	2007-07-16	2007-07-15	2007-07-01	2007	75	687	1	HIV surveillance results in Shenzhen	2.2
SYT2007-095	News	HIV transmission or risk	HK	General public	2007-07-17	2007-07-15	2007-07-01	2007	74	683	1	False serum can transmit HIV	2.2
YD2007-146	News	MSM-related crime	HK	MSM	2007-07-18	2007-07-15	2007-07-01	2007	128	678-680	3	兩男車上肛交終審維持撤控	2.2
SYT2007-090	News	Sex-related crime	HK	MSM	2007-07-19	2007-07-15	2007-07-01	2007	72	676	1	67-year-old man obscened 22-year-old boy and was killed	1
SYT2007-086	News	Policy and Laws	Overseas	General public-nurses	2007-07-19	2007-07-15	2007-07-01	2007	71	673	1	6 nurses who let more than 600 children infect HIV are sentenced	2.2
SYT2007-085	News	HIV Treatment	Overseas	PLHIV	2007-07-20	2007-07-15	2007-07-01	2007	70	668	1	Azidothymidine can improve PLHIV immunity	2.2
YD2007-143	News	HIV Education and Awareness	HK	General Public	2007-07-21	2007-07-15	2007-07-01	2007	125	667	1	香港限定版Aids Tee神秘登場	1
YD2007-141	News	HIV Transmission and Risks	HK	General Public	2007-07-23	2007-07-22	2007-07-01	2007	123	662	1	微針美容亂用 皮膚爛易染愛滋	1
SYT2007-082	News	HIV Prevention	Overseas	General public-male	2007-07-23	2007-07-22	2007-07-01	2007	69	663	1	Circumcision decreasing HIV infection risk	2.2
SYT2007-081	News	HIV Treatment	Overseas	PLHIV	2007-07-24	2007-07-22	2007-07-01	2007	68	659	1	New HIV medicine	2.2
SYT2007-079	News	HIV Prevention	Overseas	PLHIV	2007-07-25	2007-07-22	2007-07-01	2007	66	650	1	Implanting chip to monitor PLHIV	2.2
SYT2007-080	News	HIV Science	Overseas	PLHIV	2007-07-25	2007-07-22	2007-07-01	2007	67	652	1	The reason that HIV cannot be cured completely	2.2
YD2007-135	News	Social Issue	Mainland	PLHIV	2007-07-26	2007-07-22	2007-07-01	2007	117	642, 643	2	河南愛滋幫深圳軟禁港商	1
YD2007-136	News	HIV Transmission and Risks	Mainland	PLHIV	2007-07-26	2007-07-22	2007-07-01	2007	119	944	1	剔牙出血傳播南昌驚傳愛滋牙籤短訊	1
YD2007-137	News	HIV Prevention	Overseas	General Public	2007-07-26	2007-07-22	2007-07-01	2007	118	645	1	性愛潤滑劑防愛滋疱疹	2.2
SYT2007-089	News	Sex-related crime	HK	MSM	2007-07-27	2007-07-22	2007-07-01	2007	72	639	1	67-year-old man obscened 22-year-old boy and was killed	1
YD2007-134	News	Social Issue	Mainland	PLHIV	2007-07-27	2007-07-22	2007-07-01	2007	117	636, 637	2	河南愛滋幫深圳軟禁港商	1
SYT2007-077	News	HIV Prevention	Overseas	General public	2007-07-28	2007-07-22	2007-07-01	2007	64	630	1	Lubricant that can prevent HIV	2.2
YD2007-132	News	HIV-related crime	Mainland	PLHIV	2007-07-30	2007-07-29	2007-07-01	2007	117	626, 627	2	河南愛滋幫深圳軟禁港商	1
SYT2007-088	News	Sex-related crime	HK	MSM	2007-07-31	2007-07-29	2007-07-01	2007	72	624	1	67-year-old man obscened 22-year-old boy and was killed	1
SYT2007-076	News	HIV Science	Overseas	PLHIV	2007-08-07	2007-08-05	2007-08-01	2007	63	608	1	HIV clinical science	2.2
SYT2007-075	News	HIV Prevention	Mainland China	General public	2007-08-09	2007-08-05	2007-08-01	2007	62	600	1	HIV prevention measures in entertainment place	2.2
YD2007-129	Movies	Others-AIDS related movie, TV series or dramas	Overseas	PLHIV	2007-08-10	2007-08-05	2007-08-01	2007	114	595	1	《潁州的孩子》AIDS orphans related movies	1
YD2007-127	News	HIV transmission or risk	Overseas	PLHIV	2007-08-13	2007-08-12	2007-08-01	2007	112	584, 591	2	遭輪姦染病毒四出色誘報復 泰女愛滋傳給60男	1
YD2007-128	News	Events	HK	MSM	2007-08-13	2007-08-12	2007-08-01	2007	113	586, 587, 590, 592	4	沙田麗豪酒店「斷背」謀殺案	1
YD2007-126	News	Events	HK	MSM	2007-08-14	2007-08-12	2007-08-01	2007	111	583	1	沙田麗豪酒店「斷背」謀殺案	1
SYT2007-071	News	Sex-related crime	HK	MSM	2007-08-14	2007-08-12	2007-08-01	2007	58	575,578	2	MSM teacher commiting sex-related crime with a 14-year old student	2.2
YD2007-124	News	Social issues	Overseas	PLHIV	2007-08-15	2007-08-12	2007-08-01	2007	110	574	1	印度一對愛滋夫婦不堪村民歧視，要求准與女兒安樂死	1
SYT2007-074	News	Events	Overseas	Homosexuals	2007-08-16	2007-08-12	2007-08-01	2007	61	570	1	Gay Parade	2.2
SYT2007-073	News	HIV Science	Overseas	PLHIV	2007-08-17	2007-08-12	2007-08-01	2007	60	565	1	HIV hurting brain cell	2.2
YD2007-121	News	Events	HK	MSM	2007-08-18	2007-08-12	2007-08-01	2007	107	564	1	Longzhang Zhou declared himself as a gay	1
YD2007-120	News	HIV Transmission and Risks	Overseas	PLHIV	2007-08-24	2007-08-19	2007-08-01	2007	106	542	1	UN says infectious diseases spreading faster than ever	1
SYT2007-072	News	HIV Vaccine	Overseas	PLHIV	2007-08-24	2007-08-19	2007-08-01	2007	59	538	1	New HIV vaccine that cost less	2.2
YD2007-118	News	MSM-related movies	HK	MSM	2007-08-26	2007-08-26	2007-08-01	2007	93	532	1	《迫上斷背山》 MSM related movies	1
YD2007-117	News	Social issues	Overseas	PLHIV	2007-08-27	2007-08-26	2007-08-01	2007	104	530	1	Because of the war, women has no choice but being a prostitute in order to live and eventually infected with HIV	1
YD2007-114	News	Social issues	Overseas	PLHIV	2007-08-28	2007-08-26	2007-08-01	2007	102	522	1	無知愛滋害死人	1
SYT2007-068	News	Social Issues	Overseas	PLHIV	2007-08-28	2007-08-26	2007-08-01	2007	56	523	1	PLHIV were buried alive	2.2
SYT2007-069	News	HIV surveillance	Overseas	PLHIV	2007-08-28	2007-08-26	2007-08-01	2007	57	525	1	HIV surveillance results all around the world	2.2
SYT2007-070	News	Sex-related crime	HK	MSM	2007-08-28	2007-08-26	2007-08-01	2007	58	526-529	4	MSM teacher commiting sex-related crime with a 14-year old student	2.2
YD2007-111	News	Events	Overseas	MSM	2007-08-29	2007-08-26	2007-08-01	2007	99	519	1	出櫃男星 疑幻疑真	1
YD2007-112	News	Events	Overseas	MSM	2007-08-29	2007-08-26	2007-08-01	2007	100	520	1	威禾夫斷背Honey情侶裝遊街	1
YD2007-110	Drama	Others-MSM related movie, TV series or dramas	HK	MSM	2007-08-30	2007-08-26	2007-08-01	2007	7	518	1	音樂劇《異型金剛》MSM related musical drama	1
YD2007-109	Movies	Others-MSM related movie, TV series or dramas	HK	MSM	2007-08-31	2007-08-26	2007-08-01	2007	93	513	1	《迫上斷背山》 MSM related movies	1
SYT2007-066	News	HIV surveillance	HK	PLHIV	2007-08-31	2007-08-26	2007-08-01	2007	54	504-507	4	HIV surveillance results in HK	2.2
SYT2007-067	News	HIV transmission or risk	HK	General public	2007-08-31	2007-08-26	2007-08-01	2007	55	508	1	Placenta can transmit HIV	2.2
YD2007-106	Drama	Others-MSM related movie, TV series or dramas	HK	MSM	2007-09-02	2007-09-02	2007-09-01	2007	7	499	1	音樂劇《異型金剛》MSM related musical drama	1
YD2007-105	News	Social issues	Overseas	PLHIV	2007-09-07	2007-09-02	2007-09-01	2007	96	488	1	美慈為被愛滋病奪去雙親的孤兒，提供各種援助	1
YD2007-104	Movies	Others-MSM related movie, TV series or dramas	HK	MSM	2007-09-12	2007-09-09	2007-09-01	2007	93	475	1	《迫上斷背山》 MSM related movies	2.2
YD2007-103	News	Others - MV and song	Taiwan	MSM	2007-09-13	2007-09-09	2007-09-01	2007	95	470	1	The MV of Huimei Zhang's new song is related with ten gays	1
YD2007-101	Movies	Others-MSM related movie, TV series or dramas	HK	MSM	2007-09-14	2007-09-09	2007-09-01	2007	93	463, 466	2	《迫上斷背山》 MSM related movies	1
YD2007-100	News	Events	Mainland	Celebrity	2007-09-14	2007-09-09	2007-09-01	2007	92	462	1	「中國青少年愛滋病工程」慈善晚會	1
YD2007-099	TV Series	Others-MSM related movie, TV series or dramas	Overseas	PLHIV	2007-09-14	2007-09-09	2007-09-01	2007	91	461	1	《Thank You》AIDS related TV series	1
SYT2007-057	News	Sex-related crime	HK	MSM	2007-09-14	2007-09-09	2007-09-01	2007	45	465,467	2	MSM committing sex-related crime with teenager	2.2
SYT2007-064	News	Sex-related crime	HK	MSM	2007-09-15	2007-09-09	2007-09-01	2007	52	458	1	MSM sex-related crime in toilet	1
SYT2007-063	News	HIV transmission or risk	Overseas	General public-people who transfuse blood	2007-09-15	2007-09-09	2007-09-01	2007	51	453	1	HIV transmitting via blood transfusion	2.2
SYT2007-062	News	Social Issues	Overseas	MSM	2007-09-18	2007-09-16	2007-09-01	2007	50	438,439,444	3	MSM was rejected by bank service	2.2
SYT2007-061	News	Events	HK	General public	2007-09-19	2007-09-16	2007-09-01	2007	49	434	1	Donation for HIV patients on Beer Festival	2.2
YD2007-095	News	Events	Overseas	Celebrity	2007-09-21	2007-09-16	2007-09-01	2007	87	426	1	李察基爾 cares about AIDS issues	1
YD2007-094	News	Events	HK	MSM	2007-09-22	2007-09-16	2007-09-01	2007	86	423	1	Gay 侵犯逾10童	1
SYT2007-060	News	HIV Vaccine	Overseas	General Public	2007-09-24	2007-09-23	2007-09-01	2007	48	414	1	HIV Vaccine research paused	2.2
YD2007-092	News	HIV Prevention	Overseas	PLHIV	2007-09-27	2007-09-23	2007-09-01	2007	84	403	1	妓女防愛滋 勤學古老性技	1
SYT2007-056	News	Sex-related crime	HK	MSM	2007-09-29	2007-09-23	2007-09-01	2007	45	394,397	2	MSM committing sex-related crime with teenager	1
YD2007-090	News	MSM-related crime	HK	MSM	2007-09-29	2007-09-23	2007-09-01	2007	82	394, 397	2	案件速遞與少男肛交同志悔意膚淺	1
YD2007-091	News	Events	Overseas	Celebrity	2007-09-29	2007-09-23	2007-09-01	2007	83	398	1	「Debt AIDS Trade Africa」	1
YD2007-088	TV Series	Others-MSM related movie, TV series or dramas	HK	MSM	2007-10-02	2007-09-30	2007-10-01	2007	80	383	1	《王之男》MSM related TV series	1
YD2007-087	News	Events	HK	Celebrity	2007-10-07	2007-10-07	2007-10-01	2007	79	373	1	「樂善關懷愛之日」活動，為愛滋病基金會籌款	1
YD2007-086	News	Events	Overseas	Celebrity	2007-10-08	2007-10-07	2007-10-01	2007	78	370	1	Red Gap Campaign that is activity for helping AIDS patients in Africa	1
YD2007-085	News	Crime-related	HK	PLHIV	2007-10-09	2007-10-07	2007-10-01	2007	63	359, 360, 362, 364	4	AIDS paitents from Vietnam committed crim in HK	1
SYT2007-059	News	Policy and Laws	Overseas	Homosexuals	2007-10-10	2007-10-07	2007-10-01	2007	47	355,356	2	British setting up laws to protect homosexuals	2.2
YD2007-082	News	HIV Transmission and Risks	HK	General Public	2007-10-12	2007-10-07	2007-10-01	2007	75	348	1	紋身針頭重複用易染愛滋	1
SYT2007-058	News	Social Issues	Overseas	MSM	2007-10-15	2007-10-14	2007-10-01	2007	46	337-339	3	MSM priest was fired	2.2
SYT2007-055	News	Sex-related crime	HK	MSM	2007-10-19	2007-10-14	2007-10-01	2007	45	327	1	MSM committing sex-related crime with teenager	2.2
YD2007-077	Movies	Others-MSM related movie, TV series or dramas	Overseas	MSM	2007-10-21	2007-10-21	2007-10-01	2007	70	319	1	鄧不利多是同志	1
YD2007-078	Movies	Others-MSM related movie, TV series or dramas	Overseas	MSM	2007-10-21	2007-10-21	2007-10-01	2007	71	320	1	affair about 《斷背山》（Brokeback Mountain）將開拍續集	1
YD2007-079	News	Events	Overseas	MSM	2007-10-21	2007-10-21	2007-10-01	2007	72	322	1	Marc Jacobs街頭激咀男友	1
YD2007-076	News	Criminal Charges	HK	PLHIV	2007-10-22	2007-10-21	2007-10-01	2007	63	314	1	博坐監醫愛滋越人蛇重囚	1
YD2007-075	News	Criminal Charges	HK	PLHIV	2007-10-23	2007-10-21	2007-10-01	2007	63	310	1	兩愛滋越籍匪今上庭	1
SYT2007-051	News	HIV transmission or risk	Overseas	PLHIV	2007-10-24	2007-10-21	2007-10-01	2007	43	306	1	Knowledge about HIV transmission	2.2
SYT2007-052	News	Social Issues	Taiwan	MSM	2007-10-24	2007-10-21	2007-10-01	2007	44	308	1	Toilet that provides convenience to MSM in Taiwan	2.2
SYT2007-050	News	Social Issues	Overseas	MSM	2007-10-25	2007-10-21	2007-10-01	2007	42	304	1	MSM feared discrimination	1
YD2007-072	Movies	Others-MSM related movie, TV series or dramas	Taiwan	MSM	2007-10-26	2007-10-21	2007-10-01	2007	67	294	1	《盛夏》Gay男張睿家轉搞師生戀	1
SYT2007-046	Others-film exhibition	Others-film exhibition	HK	MSM	2007-10-26	2007-10-21	2007-10-01	2007	38	293	1	MSM film exhibition	2.2
YD2007-070	News	Events	Overseas	Celebrity	2007-10-28	2007-10-28	2007-10-01	2007	65	287, 289	2	身羅馬舉行嘅對抗愛滋病慈善宴	1
YD2007-068	News	Criminal charges	HK	PLHIV	2007-10-30	2007-10-28	2007-10-01	2007	63	274	1	博坐監醫愛滋越人蛇重囚	1
SYT2007-049	News	HIV transmission or risk	Overseas	General public	2007-10-31	2007-10-28	2007-10-01	2007	41	272	1	HIV transmitting from Haiti to America in 1969	2.2
YD2007-066	News	HIV Science	Overseas	PLHIV	2007-11-02	2007-10-28	2007-11-01	2007	61	268, 270, 271	3	Cat's DNA findings may help combat AIDS, SARS, other diseases	1
YD2007-064	News	Events	Overseas	Homosexuals	2007-11-06	2007-11-04	2007-11-01	2007	59	261	1	反同性戀示威	1
SYT2007-048	News	HIV surveillance	Mainland China	PLHIV	2007-11-06	2007-11-04	2007-11-01	2007	40	262	1	HIV infection increasing about 3000 per month in China	2.2
YD2007-063	News	MSM-related crime	HK	MSM	2007-11-08	2007-11-04	2007-11-01	2007	58	257	1	法漢剝褲屁股揩的士司機面	1
YD2007-062	News	HIV Transmission and Risks	Overseas	General Public	2007-11-09	2007-11-04	2007-11-01	2007	54	253	1	英年輕人旅行易染性病	1
SYT2007-047	News	HIV Vaccine	Overseas	General Public	2007-11-09	2007-11-04	2007-11-01	2007	39	249,250	2	HIV Vaccine test failed	2.2
YD2007-060	News	Others - film exhibition	HK	Homosexuals	2007-11-09	2007-11-04	2007-11-01	2007	56	248	1	《香港同志影展07》18+	2.2
YD2007-058	News	HIV Transmission and Risks	Overseas	General Public	2007-11-12	2007-11-11	2007-11-01	2007	54	239	1	travel other place and meet new sexual mate may increase the chance to be infected with HIV	1
YD2007-059	News	HIV Transmission and Risks	Mainland	General Public	2007-11-12	2007-11-11	2007-11-01	2007	55	238, 241	2	安全套變束髮橡筋用後隨時染性病	1
SYT2007-041	News	Others-TV program	HK	Homosexuals	2007-11-13	2007-11-11	2007-11-01	2007	35	231	1	Homosexuals TV program "鏗鏘集"	1
YD2007-055	News	Others - film exhibition	HK	Homosexuals	2007-11-13	2007-11-11	2007-11-01	2007	51	231	1	同志影展表揚港台	1
SYT2007-043	News	Policy and Laws	Mainland China	PLHIV	2007-11-13	2007-11-11	2007-11-01	2007	36	234	1	China will cancel the entering restrict of PLHIV	2.2
SYT2007-037	News	HIV testing	Overseas	General public-Immigration	2007-11-15	2007-11-11	2007-11-01	2007	32	217	1	Immigration should conduct HIV tests	1
SYT2007-038	News	Sex-related crime	HK	MSM	2007-11-15	2007-11-11	2007-11-01	2007	33	220	1	Sex-related crime in MSM	1
SYT2007-054	News	Sex-related crime	HK	MSM	2007-11-15	2007-11-11	2007-11-01	2007	45	220	1	MSM committing sex-related crime with teenager	1
SYT2007-036	News	HIV transmission or risk	Overseas	General public-patients who transferred organs	2007-11-15	2007-11-11	2007-11-01	2007	31	216,218,225	3	4 patients were infected HIV when transfering organs	2.2
YD2007-054	News	Events	Overseas	PLHIV	2007-11-15	2007-11-11	2007-11-01	2007	50	222	1	Gucci聖誕送暖到非洲	2.2
YD2007-051	News	Events	Overseas	Celebrity	2007-11-16	2007-11-11	2007-11-01	2007	47	215	1	「大姑媽」艾頓莊的愛滋病基金派對	1
SYT2007-034	News	Social Issues	HK	Homosexuals	2007-11-16	2007-11-11	2007-11-01	2007	29	210	1	Resources that help homosexuals are not enough	2.2
SYT2007-053	News	MSM-related crime	HK	MSM	2007-11-16	2007-11-11	2007-11-01	2007	45	214	1	MSM committing sex-related crime with teenager	2.2
YD2007-049	News	Events	Mainland	Celebrity	2007-11-16	2007-11-11	2007-11-01	2007	45	212	1	蓋茨基金助華防控愛滋	2.2
SYT2007-033	News	HIV transmission or risk	Overseas	General public	2007-11-18	2007-11-18	2007-11-01	2007	28	203	1	A woman was infected HIV when changing Kidney	2.2
YD2007-047	News	Events	Overseas	Celebrity	2007-11-18	2007-11-18	2007-11-01	2007	43	204	1	麥當娜Gucci 助百萬孤兒脫貧	2.2
SYT2007-032	News	HIV Treatment	Overseas	PLHIV	2007-11-20	2007-11-18	2007-11-01	2007	27	196	1	New HIV medicine	1
SYT2007-031	News	HIV surveillance	Overseas	PLHIV	2007-11-21	2007-11-18	2007-11-01	2007	26	193	1	HIV surveillance results all around the world	2.2
YD2007-044	News	HIV Surveillance	HK	PLHIV	2007-11-22	2007-11-18	2007-11-01	2007	40	192	1	本港愛滋病感染人數持續增長，由85年至今已累積發現3,400人，每季平均有逾百多宗新個案，增長速度亦有加快跡象	1
SYT2007-030	News	HIV surveillance	Overseas	PLHIV	2007-11-22	2007-11-18	2007-11-01	2007	26	191	1	HIV surveillance results all around the world	2.2
SYT2007-029	News	HIV Treatment	Mainland China	PLHIV	2007-11-23	2007-11-18	2007-11-01	2007	25	185	1	Chinese medicine curing a HIV patient	1
YD2007-042	News	HIV Surveillance	HK	PLHIV	2007-11-23	2007-11-18	2007-11-01	2007	38	182-186	5	逾400愛滋病新症本港男男性交感染大增	2.2
YD2007-041	News	MSM-related crime	HK	MSM	2007-11-24	2007-11-18	2007-11-01	2007	37	172, 174, 175	3	男教師遭同志勒索四萬	1
SYT2007-027	News	Events	Overseas	PLHIV	2007-11-24	2007-11-18	2007-11-01	2007	23	171	1	British princess shaking hands with HIV patients	2.2
YD2007-039	News	HIV Treatment	HK	PLHIV	2007-11-26	2007-11-25	2007-11-01	2007	38	163	1	愛滋女病人痛苦中抉擇	1
YD2007-038	News	MSM-related crime	HK	MSM	2007-11-27	2007-11-25	2007-11-01	2007	37	159, 160	2	勒索同性戀教師案被告稱因拒肛交遭誣告	1
YD2007-037	News	Events	HK	Celebrity	2007-11-28	2007-11-25	2007-11-01	2007	36	152	1	費天王拍廣告抗愛滋	2.2
SYT2007-025	News	HIV surveillance	HK	PLHIV	2007-11-29	2007-11-25	2007-11-01	2007	21	143-146	4	HIV surveillance results in HK	2.2
SYT2007-012	News	HIV surveillance	Mainland China	PLHIV	2007-11-30	2007-11-25	2007-11-01	2007	9	137	1	HIV surveillance results in Mainland China	1
YD2007-035	News	HIV Surveillance	Mainland	PLHIV	2007-11-30	2007-11-25	2007-11-01	2007	34	136	1	今年底全國愛滋病毒感染者和病人將達70萬	1
SYT2007-023	News	HIV Education and Awareness	HK	General public	2007-11-30	2007-11-25	2007-11-01	2007	19	133	1	HIV Education should be more comprehensive	2.2
SYT2007-024	News	HIV transmission or risk	Mainland China	PLHIV	2007-11-30	2007-11-25	2007-11-01	2007	20	135	1	HIV infected pregnant woman delivering a baby	2.2
YD2007-030	News	HIV Education and Awareness	Overseas	PLHIV	2007-12-01	2007-11-25	2007-12-01	2007	29	125	1	蒼蠅．愛滋．希特拉	1
YD2007-032	News	Events	Overseas	MSM	2007-12-01	2007-11-25	2007-12-01	2007	31	128	1	英國教會內的同性戀神職人員舉行的領聖體儀式	1
YD2007-029	News	Surveys	HK	General Public	2007-12-01	2007-11-25	2007-12-01	2007	28	124	1	近半市民歧視愛滋病人	2.2
YD2007-031	News	Events	HK	Celebrity	2007-12-01	2007-11-25	2007-12-01	2007	30	126, 127, 130	3	Activies in HK on The World AIDS Day	2.2
SYT2007-016	News	Events	Mainland China	General public	2007-12-02	2007-12-02	2007-12-01	2007	12	120	1	World AIDS day	2.2
SYT2007-017	News	Events	Overseas	General public	2007-12-02	2007-12-02	2007-12-01	2007	13	121	1	World AIDS day	2.2
YD2007-026	News	Events	HK	PLHIV	2007-12-02	2007-12-02	2007-12-01	2007	25	118	1	路人擁抱支持愛滋病者	2.2
YD2007-024	News	Events	Overseas	MSM	2007-12-03	2007-12-02	2007-12-01	2007	23	113	1	賴斯與密友買屋傳斷背	1
YD2007-025	News	Events	Mainland	PLHIV	2007-12-03	2007-12-02	2007-12-01	2007	24	117	1	慈善跑，為「聯合國兒童基金會」籌款	1
SYT2007-018	News	Celebrities	Mainland China	General public	2007-12-03	2007-12-02	2007-12-01	2007	14	109-111,116	4	「Simply I」charity exhibition	2.2
SYT2007-019	News	Events	Mainland China	PLHIV	2007-12-03	2007-12-02	2007-12-01	2007	15	106,112	2	Chinese president visiting Henan HIV village	2.2
YD2007-018	News	Events	Mainland	PLHIV	2007-12-03	2007-12-02	2007-12-01	2007	17	105	1	支援受愛滋病影響孤兒	2.2
YD2007-019	News	Events	Overseas	Celebrity	2007-12-03	2007-12-02	2007-12-01	2007	18	107	1	南非前總統曼德拉（Nelson Mandela）在約翰內斯堡舉行的46664慈善音樂會	2.2
YD2007-020	News	HIV Prevention	Mainland	General Public	2007-12-03	2007-12-02	2007-12-01	2007	19	108	1	Distributing condems on The World AIDS Day in Mainland	2.2
YD2007-017	Drama	Others-MSM related movie, TV series or dramas	HK	MSM	2007-12-04	2007-12-02	2007-12-01	2007	7	103	1	《異型金剛》MSM related musical drama	1
YD2007-016	News	HIV Transmission and Risks	Mainland	PLHIV	2007-12-04	2007-12-02	2007-12-01	2007	16	102	1	暗娼是內地愛滋病的主要感染途徑	2.2
SYT2007-003	News	Others-volunteers	Mainland China	PLHIV	2007-12-06	2007-12-02	2007-12-01	2007	1	98	1	Volunteer(胡佳) engaged in HIV prevention is arrested	1
YD2007-014	News	HIV Treatment	Overseas	PLHIV	2007-12-06	2007-12-02	2007-12-01	2007	14	94, 99	2	治愛滋九年美婦始知未染病	1
YD2007-015	News	Events	Mainland	Celebrity	2007-12-06	2007-12-02	2007-12-01	2007	15	95, 96, 97	3	馮仁昭四圍超：Chi Lam宣傳防愛滋	2.2
YD2007-013	News	HIV Education and Awareness	Mainland	PLHIV	2007-12-07	2007-12-02	2007-12-01	2007	13	92	1	聯合國開發計劃署及在京舉行愛滋病公益廣告發佈會	1
YD2007-012	News	Social Issue	Mainland	PLHIV	2007-12-11	2007-12-09	2007-12-01	2007	12	67	1	遺孤心聲信有傳情	1
SYT2007-009	Movies	Movies	Mainland China	PLHIV	2007-12-13	2007-12-09	2007-12-01	2007	7	58	1	PLHIV movie entitled "潁州的孩子"	1
YD2007-011	News	HIV Prevention	Overseas	General Public	2007-12-14	2007-12-09	2007-12-01	2007	11	57	1	《時代》選今年50個十大 in the medicine part, it selected the finding related to HIV prevention	1
YD2007-010	News	HIV Surveillance	HK	MSM	2007-12-14	2007-12-09	2007-12-01	2007	10	52,53, 55	3	基民濫交染愛滋飆增73%群組患者性伴逾50人	2.2
YD2007-008	News	HIV Science	Overseas	General Public	2007-12-18	2007-12-16	2007-12-01	2007	8	40	1	精液表面物質 與癌細胞愛滋病相似	1
YD2007-009	News	HIV Transmission and Risks	HK	General Public	2007-12-18	2007-12-16	2007-12-01	2007	9	41, 42	2	七成大學生沒帶安全套習慣	1
YD2007-007	Drama	Others-MSM related movie, TV series or dramas	HK	MSM	2007-12-19	2007-12-16	2007-12-01	2007	7	38	1	《異型金剛》MSM related musical drama	1
YD2007-004	News	HIV Prevention	Overseas	PLHIV	2007-12-21	2007-12-16	2007-12-01	2007	4	25	1	Religion and belife is the key solution to prevent AIDS	1
SYT2007-007	News	HIV testing	HK	MSM	2007-12-21	2007-12-16	2007-12-01	2007	5	29	1	Volunteer organization(「香港彩虹」) providing free HIV tests to MSM	2.2
YD2007-005	News	Events	HK	Celebrity	2007-12-21	2007-12-16	2007-12-01	2007	5	26, 27, 30	3	房祖名身邊同志多平常心對愛滋病患者	2.2
SYT2007-005	News	Events	Overseas	Celebrity	2007-12-24	2007-12-23	2007-12-01	2007	3	18	1	Manchester United conducting charity competition for HIV concern	1
YD2007-003	News	Events	Overseas	MSM	2007-12-24	2007-12-23	2007-12-01	2007	3	21, 22	2	朗尼、高蓮明年結婚堂兄弟自薦做伴娘	1
YD2007-002	News	Events	Overseas	Celebrity	2007-12-28	2007-12-23	2007-12-01	2007	2	18	1	紅魔眾星對抗愛滋	1
YD2007-001	News	HIV Transmission and Risks	Overseas	PLHIV	2007-12-29	2007-12-23	2007-12-01	2007	1	6	1	日本患愛滋捐血者創新高	2.2
SYT2007-002	News	Others-volunteers	Mainland China	PLHIV	2007-12-30	2007-12-30	2007-12-01	2007	1	5	1	Volunteer(胡佳) engaged in HIV prevention is arrested	1
SYT2007-001	News	Others-volunteers	Mainland China	PLHIV	2007-12-31	2007-12-30	2007-12-01	2007	1	1,3,4	3	Volunteer(胡佳) engaged in HIV prevention is arrested	1
YD2008-252	News	Event	HK	PLHIV	2008-01-01	2007-12-30	2008-01-01	2008	214	1363	1	MMM關注愛滋08SS Aids Tee	1
LPK2008-157	News	Surveys	HK	MSM	2008-01-02	2007-12-30	2008-01-01	2008	146	1261	1	4 out of 100 MSM suffered from AIDS	2.2
YD2008-250	News	HIV Prevention	HK	General Public	2008-01-03	2007-12-30	2008-01-01	2008	212	1257	1	H&M防AIDS口號	2.2
YD2008-249	News	HIV Treatment	Overseas	PLHIV	2008-01-07	2008-01-06	2008-01-01	2008	211	1243	1	津巴布韋醫療制度崩潰 especially the problems of AIDS treatment	1
YD2008-248	News	Social Issues	Mainland	PLHIV	2008-01-09	2008-01-06	2008-01-01	2008	210	1240	1	穗追數公司 聘愛滋漢討債	1
LPK2008-155	News	Social Issues	HK	General public	2008-01-14	2008-01-13	2008-01-01	2008	144	1224	1	Hongkongers unconcern for AIDS	1
LPK2008-154	News	HIV Science	Overseas	General public	2008-01-15	2008-01-13	2008-01-01	2008	143	1222	1	Harvard University's research discovered that transmission of HIV required 237 types of proteins	2.2
LPK2008-153	News	Social Issues	Overseas	MSM	2008-01-17	2008-01-13	2008-01-01	2008	142	1216	1	MSM has a higher risk of infected by bacteria "USA300"	1
YD2008-245	Movie	Others-MSM related movies and TV series	Overseas	MSM	2008-01-18	2008-01-13	2008-01-01	2008	206	1213	1	鄧不利多 與蘇格拉底	1
LPK2008-152	News	Sex-related crime	HK	MSM	2008-01-20	2008-01-20	2008-01-01	2008	141	1207	1	MSM commited sex-related crime	2.2
YD2008-243	Movie	Others-MSM related movies and TV series	Overseas	MSM	2008-01-21	2008-01-20	2008-01-01	2008	206	1202	1	鄧不利多 與蘇格拉底	1
LPK2008-151	Movie	Social Issues	Overseas	Others	2008-01-21	2008-01-20	2008-01-01	2008	140	1201	1	A drama was blamed for describing Jesus as homosexual	2.2
YD2008-240	News	Event	Overseas	MSM	2008-01-22	2008-01-20	2008-01-01	2008	204	1198	1	古希臘的 師生同性戀	1
YD2008-241	News	Event	Overseas	Homosexuals	2008-01-22	2008-01-20	2008-01-01	2008	156	1199	1	第19屆美國同性戀反歧視聯盟傳媒頒獎禮	1
LPK2008-150	Editorial	Social Issues	Overseas	Homosexuals	2008-01-23	2008-01-20	2008-01-01	2008	139	1196, 1198	2	J.K. Rowling was blamed for promoting homosexuality	1
YD2008-239	News	Others - Homosexual Animation	Overseas	Homosexuals	2008-01-24	2008-01-20	2008-01-01	2008	203	1193	1	卡通人物出櫃熱	1
YD2008-247	News	HIV Education and Awareness	HK	Generl Public	2008-01-24	2008-01-20	2008-01-01	2008	209	1224	1	港人面對愛滋態度冷漠	1
YD2008-238	News	Surveys	Overseas	Homosexuals	2008-01-26	2008-01-20	2008-01-01	2008	202	1184	1	英國一項調查發現，大部分受訪者都不願談及個人性取向，每100人僅1位承認是同性戀者	1
YD2008-237	News	Surveys	Overseas	Homosexuals	2008-01-28	2008-01-27	2008-01-01	2008	201	1176	1	英國一項調查發現，大部分受訪者都不願談及個人性取向，每100人僅1位承認是同性戀者	2.2
YD2008-235	News	Event	Mainland	PLHIV	2008-01-31	2008-01-27	2008-01-01	2008	199	1165	1	傳病妻內疚一生妻早年病歿 愛滋漢無力為女建安樂窩	1
YD2008-236	News	Event	HK	MSM	2008-01-31	2008-01-27	2008-01-01	2008	200	1166	1	林一峰大方認同志	1
YD2008-234	News	Surveys	Overseas	PLHIV	2008-02-02	2008-01-27	2008-02-01	2008	198	1156	1	染青黴菌多涉愛滋病者	1
YD2008-233	News	HIV Science	Overseas	PLHIV	2008-02-04	2008-02-03	2008-02-01	2008	197	1154	1	瑞士一項研究發現感染了愛滋病毒的人士，若持續接受有效的抗病毒治療，即使在性行為時不用安全套，也不會將病毒傳播給伴侶	2.2
YD2008-232	News	HIV Prevention	HK	PLHIV	2008-02-05	2008-02-03	2008-02-01	2008	196	1149	1	產房快檢 防母嬰染愛滋	2.2
YD2008-230	News	HIV Prevention	HK	PLHIV	2008-02-06	2008-02-03	2008-02-01	2008	194	1145	1	懷孕三個月驗出愛滋	1
LPK2008-146	News	Sex-related crime	Overseas	MSM	2008-02-06	2008-02-03	2008-02-01	2008	135	1146	1	MSM commited sex-related crime	2.2
LPK2008-145	News	Events	Overseas	PLHIV	2008-02-08	2008-02-03	2008-02-01	2008	134	1141	1	Gucci held events for raising money for AIDS orphans	1
LPK2008-144	News	Events	Overseas	PLHIV	2008-02-09	2008-02-03	2008-02-01	2008	134	1140	1	Gucci held events for raising money for AIDS orphans	1
YD2008-229	News	Event	Overseas	PLHIV	2008-02-11	2008-02-10	2008-02-01	2008	193	1140	1	由Gucci 發起，為受愛滋病影響的非洲孤兒及兒童籌款的「A Night to benefit Raising Malawi 」晚會	1
YD2008-228	Movie	Others-MSM related movies and TV series	HK	MSM	2008-02-13	2008-02-10	2008-02-01	2008	192	1134	1	<緣份吹吹風> MSM related movie	1
LPK2008-143	News	HIV Transmission or Risk	Overseas	General public	2008-02-14	2008-02-10	2008-02-01	2008	133	1126	1	Infants fed with chewed food may suffered from AIDS	2.2
YD2008-226	News	Event	Overseas	Celebrity	2008-02-16	2008-02-10	2008-02-01	2008	190	1113, 1114	2	Bono籌3.2億抗愛滋	2.2
YD2008-225	News	Event	Overseas	Celebrity	2008-02-17	2008-02-17	2008-02-01	2008	189	1110	1	泰迪史雲頓撐同志獲表揚	2.2
LPK2008-139	News	Social Issues	Overseas	MSM	2008-02-19	2008-02-17	2008-02-01	2008	129	1100	1	MSM has a higher risk of suffering from Syphilis	1
YD2008-224	News	HIV Prevention	Overseas	General Public	2008-02-19	2008-02-17	2008-02-01	2008	187	1105	1	一種原設計用以預防女性感染愛滋病的藥膏並無預防功效，但不排除可配合其他藥物使用達致效果	2.2
LPK2008-108	News	Social Issues	HK	Homosexuals	2008-02-19	2008-02-17	2008-02-01	2008	99	1101, 1103	2	Broadcasting Authority is blamed to discrimination of homosexuals	2.2
YD2008-222	News	HIV Prevention	overseas	General Public	2008-02-20	2008-02-17	2008-02-01	2008	187	1098	1	一種原設計用以預防女性感染愛滋病的藥膏並無預防功效，但不排除可配合其他藥物使用達致效果	1
YD2008-221	News	HIV Prevention	Mainland	MSM	2008-02-21	2008-02-17	2008-02-01	2008	186	1093	1	中國感染愛滋病的男同性戀者超過4.5萬人，今年將開展有關的防治政策	2.2
YD2008-220	News	Event	Overseas	Homosexuals	2008-02-26	2008-02-24	2008-02-01	2008	185	1077	1	前微軟高層5億遺產贈同志	2.2
YD2008-218	News	HIV Surveillance	HK	PLHIV	2008-02-27	2008-02-24	2008-02-01	2008	183	1069-1072	4	港人患愛滋創新高男同性戀者感染增四成	2.2
YD2008-219	News	HIV Education and Awareness	Overseas	General Public	2008-02-27	2008-02-24	2008-02-01	2008	184	1073	1	Please Talk to Kids About AIDS a vedio that can used by patients to teach their children of sexual knowledge	2.2
LPK2008-134	News	Other Statistics	Overseas	PLHIV	2008-03-04	2008-03-02	2008-03-01	2008	124	1053	1	An Australian research claimed that the number of AIDS patients will increase drastically	2.2
YD2008-216	News	Event	Overseas	PLHIV	2008-03-05	2008-03-02	2008-03-01	2008	181	1050	1	韓逐愛滋華公民被指違人權	2.2
YD2008-215	News	HIV Education and Awareness	Overseas	General Public	2008-03-06	2008-03-02	2008-03-01	2008	180	1044	1	民眾忽視愛滋病威脅	2.2
YD2008-214	News	Event	Overseas	MSM	2008-03-13	2008-03-09	2008-03-01	2008	179	1027	1	伊朗同性戀者尋庇護英當局見死不救	1
YD2008-213	News	Event	Overseas	MSM	2008-03-18	2008-03-16	2008-03-01	2008	178	1016	1	Jim McGreevey 認同性戀辭州長職	1
LPK2008-131	News	HIV Transmission or Risk	Mainland China	General public	2008-03-19	2008-03-16	2008-03-01	2008	121	1010	1	An incorrect message about AIDS was spread and get people into panic	2.2
LPK2008-130	News	Events	Mainland China	Homosexuals	2008-03-24	2008-03-23	2008-03-01	2008	120	998	1	Petition is held by homosexuals related to legalization of same-sex marriage	2.2
LPK2008-129	News	HIV Prevention	Overseas	General public	2008-03-27	2008-03-23	2008-03-01	2008	119	992	1	United Nation worried about the outbreak of cases that patients suffered from both AIDS and tuberculosis	2.2
YD2008-209	News	Event	HK	Celebrity	2008-03-28	2008-03-23	2008-03-01	2008	174	988	1	M.A.C x Fergie為愛滋病籌款	1
YD2008-208	News	Event	HK	Celebrity	2008-03-29	2008-03-23	2008-03-01	2008	173	986	1	Gu Juji attended activity of concern of AIDS and claimed that he kept condems	1
YD2008-207	News	Event	HK	Celebrity	2008-03-31	2008-03-30	2008-03-01	2008	172	976	1	羅霖出席支持香港愛滋病基金會舉行的義工嘉許禮	2.2
LPK2008-127	News	HIV Vaccine	HK	General public	2008-03-31	2008-03-30	2008-03-01	2008	117	975	1	AIDS vaccine developed by faculty of medicine of University of Hong Kong and professor David Ho is under testing	2.2
YD2008-205	News	Social Issues	Overseas	Homosexuals	2008-04-03	2008-03-30	2008-04-01	2008	170	966	1	教同性戀童話英兩小學遭狂轟	1
YD2008-204	News	HIV Treatment	Overseas	PLHIV	2008-04-03	2008-03-30	2008-04-01	2008	169	965	1	兩愛滋藥增心臟病風險	2.2
YD2008-203	News	Event	Overseas	MSM	2008-04-08	2008-04-06	2008-04-01	2008	168	947	1	艾倫膺最具影響力同志	1
LPK2008-125	News	HIV Transmission or Risk	Mainland China	PLHIV	2008-04-08	2008-04-06	2008-04-01	2008	115	946	1	A man used a suspected syringe to rob others	2.2
YD2008-200	News	Event	Overseas	Celebrity	2008-04-09	2008-04-06	2008-04-01	2008	166	942	1	Girls in the movie of Sex and City attended activity of funding for homosexuals	2.2
YD2008-198	News	Social Issues	Mainland	PLHIV	2008-04-11	2008-04-06	2008-04-01	2008	165	933	1	輸血染愛滋病示威被毆	2.2
LPK2008-121	Editorial	Social Issues	HK	Homosexuals	2008-04-14	2008-04-13	2008-04-01	2008	111	920	1	Editor thinked that there is not much difference between heterosexuality and homosexuality	1
YD2008-197	News	Event	HK	PLHIV	2008-04-15	2008-04-13	2008-04-01	2008	164	917	1	美國護膚品牌Kiehl’s早兩年推出限量沐浴啫喱，將收益全數撥捐「關懷愛滋」慈善組織，今年再接再勵	1
LPK2008-120	Editorial	Others	HK	Homosexuals	2008-04-15	2008-04-13	2008-04-01	2008	110	913	1	Editor talked about the origin of "homosexuality"	1
YD2008-196	News	Event	HK	Celebrity	2008-04-16	2008-04-13	2008-04-01	2008	163	909	1	「愛．活力」救助愛滋遺孤籌款之夜記招	1
LPK2008-119	Editorial	Social Issues	HK	Homosexuals	2008-04-16	2008-04-13	2008-04-01	2008	109	908	1	Editor's attitude towards homosexuality is neutral	2.2
LPK2008-118	News	Surveillance	HK	PLHIV	2008-04-17	2008-04-13	2008-04-01	2008	108	906	1	Number of people required medical treatment of AIDS increased	1
YD2008-194	News	HIV Treatment	HK	PLHIV	2008-04-17	2008-04-13	2008-04-01	2008	161	905, 906	2	增撥4200萬元應付愛滋病人	2.2
YD2008-192	News	HIV Surveillance	HK	PLHIV	2008-04-21	2008-04-20	2008-04-01	2008	160	895, 896	1	剛入獄罪犯0.4%帶愛滋	2.2
YD2008-190	News	HIV Transmission and Risks	Overseas	PLHIV	2008-04-23	2008-04-20	2008-04-01	2008	158	884, 885	1	男網上稱愛滋傳千五女	2.2
YD2008-191	News	Social Issues	Overseas	MSM	2008-04-23	2008-04-20	2008-04-01	2008	159	886	1	莫吉封殺攣球員	2.2
YD2008-189	Movie	Others-MSM related movies and TV series	Overseas	MSM	2008-04-24	2008-04-20	2008-04-01	2008	53	882	1	《Taking Woodstock》MSM related movie	1
LPK2008-111	Movie	Others	Overseas	MSM	2008-04-24	2008-04-20	2008-04-01	2008	102	882	1	Review of movie "Brokeback Mountain"	1
YD2008-188	News	HIV Treatment	Overseas	PLHIV	2008-04-26	2008-04-20	2008-04-01	2008	157	874	1	臨床監察愛滋準確如化驗	2.2
YD2008-186	News	Event	Overseas	Homosexuals	2008-04-28	2008-04-27	2008-04-01	2008	156	871	1	第19 屆反歧視同性戀者聯盟傳媒獎頒獎禮（GLAAD ）前日於洛杉磯舉行	1
YD2008-187	Movie	Others-MSM related movies and TV series	Overseas	MSM	2008-04-28	2008-04-27	2008-04-01	2008	53	872	1	《Taking Woodstock》MSM related movie	1
YD2008-185	Movie	Others-MSM related movies and TV series	Overseas	MSM	2008-05-01	2008-04-27	2008-05-01	2008	155	865	1	《I Love You Phillip Morris》 MSM related movie	1
YD2008-183	News	Event	HK	Celebrity	2008-05-04	2008-05-04	2008-05-01	2008	153	848	1	徐子淇 救愛滋遺孤	1
YD2008-182	News	Event	HK	Celebrity	2008-05-05	2008-05-04	2008-05-01	2008	153	844	1	徐子淇 救愛滋遺孤	2.2
YD2008-181	Movie	Others-MSM related movies and TV series	Overseas	MSM	2008-05-06	2008-05-04	2008-05-01	2008	53	842	1	《Taking Woodstock》MSM related movie	1
YD2008-180	TV series	Event	HK	MSM	2008-05-09	2008-05-04	2008-05-01	2008	152	828, 830, 831	3	港台同志節目《鏗鏘集》 官指不偏不倚男同志挑戰廣管局勝訴	2.2
LPK2008-106	News	Social Issues	Overseas	MSM	2008-05-11	2008-05-11	2008-05-01	2008	98	823	1	MSM obtained offspring by surrogacy	2.2
YD2008-177	News	Surveys	Overseas	MSM	2008-05-14	2008-05-11	2008-05-01	2008	149	811	1	男子有兄長的數量愈多，他成為同性戀者的機率可能愈大	1
YD2008-178	TV series	Others-MSM related movies and TV series	HK	MSM	2008-05-14	2008-05-11	2008-05-01	2008	150	812, 813	2	高院法官夏正民下令廣管局撤銷向港台《鏗鏘集》發出的「強烈勸喻」	1
YD2008-176	TV series	Others-MSM related movies and TV series	HK	Homosexuals	2008-05-14	2008-05-11	2008-05-01	2008	148	810	1	Commentary on 《鏗鏘集》 and homosexuals	2.2
YD2008-175	TV series	Others-MSM related movies and TV series	HK	Homosexuals	2008-05-15	2008-05-11	2008-05-01	2008	147	807	1	《鏗鏘集》〈同志．戀人〉homosexuals related TV series	1
LPK2008-104	News	HIV Transmission or Risk	Overseas	Others	2008-05-16	2008-05-11	2008-05-01	2008	96	802	1	Blood splashed into a reporter's mouth	2.2
YD2008-172	News	Event	Overseas	MSM	2008-05-17	2008-05-11	2008-05-01	2008	144	796	1	《花花公子》母公司進軍男同志市場	1
YD2008-173	News	HIV Transmission and Risks	Overseas	PLHIV	2008-05-17	2008-05-11	2008-05-01	2008	145	801	1	愛滋漢向警吐口水重判35年	2.2
YD2008-171	News	Event	HK	Homosexuals	2008-05-18	2008-05-18	2008-05-01	2008	142	794	1	「國際不再恐同日」gay prada	2.2
YD2008-169	News	Event	HK	Homosexuals	2008-05-19	2008-05-18	2008-05-01	2008	142	789	1	「國際不再恐同日」gay prada	1
YD2008-170	News	Event	Overseas	Celebrity	2008-05-19	2008-05-18	2008-05-01	2008	143	790	1	奧地利愛滋病慈善基金昨日在當地首都維也納舉行一年一度的生命晚會（Life Ball），為基金籌款	1
YD2008-168	News	HIV Prevention	Mainland	General Public	2008-05-20	2008-05-18	2008-05-01	2008	141	781, 783	2	奧運在即 嚴防遊客播愛滋 京強制酒店房放安全套	2.2
YD2008-167	News	Event	Overseas	MSM	2008-05-21	2008-05-18	2008-05-01	2008	72	780	1	《星空》領航員申請與男友結婚	1
YD2008-166	News	Event	HK	Celebrity	2008-05-23	2008-05-18	2008-05-01	2008	138	775-777	2	第61屆康城影展關懷愛滋	1
YD2008-165	News	HIV Surveillance	Mainland	PLHIV	2008-05-23	2008-05-18	2008-05-01	2008	140	774	1	北京市已累計收到569宗愛滋病病人的報告，流行範圍涉及市內18個區縣	2.2
YD2008-164	News	HIV Transmission and Risks	Overseas	PLHIV	2008-05-24	2008-05-18	2008-05-01	2008	139	769	1	愛滋醫生接生200嬰母親驚嚇	1
LPK2008-101	News	Events	Overseas	PLHIV	2008-05-24	2008-05-18	2008-05-01	2008	93	790	1	A fundraising event in Austria for helping AIDS patients	1
YD2008-163	News	Event	HK	Celebrity	2008-05-24	2008-05-18	2008-05-01	2008	138	767-768	2	第61屆康城影展關懷愛滋	2.2
YD2008-162	Movie	Others-MSM related movies and TV series	Overseas	MSM	2008-05-25	2008-05-25	2008-05-01	2008	65	765	1	《我要cake 一cake 》MSM related movie	1
LPK2008-096	News	HIV Transmission or Risk	Mainland China	General public	2008-05-25	2008-05-25	2008-05-01	2008	88	761	1	7 people robbed others by using suspected HIV syringe	2.2
LPK2008-090	News	Sex-related crime	HK	MSM	2008-05-31	2008-05-25	2008-05-01	2008	82	749	1	MSM commited sex-related crime	2.2
LPK2008-095	News	Other Statistics	Overseas	General public	2008-06-02	2008-06-01	2008-06-01	2008	87	743	1	46% of respondents in Swaziland are willing to use condom and 40% of citizens are infected by HIV	1
YD2008-159	News	Event	Overseas	MSM	2008-06-03	2008-06-01	2008-06-01	2008	135	738, 739, 741	3	法國時裝界聖人 聖羅蘭逝世	1
LPK2008-094	News	HIV Science	Overseas	General public	2008-06-05	2008-06-01	2008-06-01	2008	86	733	1	Estrogen can prevent HIV infection on skin	2.2
YD2008-157	Movie	Others-MSM related movies and TV series	HK	MSM	2008-06-09	2008-06-08	2008-06-01	2008	123	721, 723	2	《無野之城》工作室被毀	1
YD2008-156	Movie	Others-MSM related movies and TV series	HK	MSM	2008-06-10	2008-06-08	2008-06-01	2008	12	720	1	《斷背山》MSM related movie	2.2
YD2008-155	Editorial	Social Issues	HK	Homosexuals	2008-06-11	2008-06-08	2008-06-01	2008	133	713	1	Parents' choice when they find their child is gay	1
LPK2008-092	News	Surveillance	Overseas	PLHIV	2008-06-11	2008-06-08	2008-06-01	2008	84	712	1	Global new AIDS cases reduced, compared with years before	2.2
YD2008-153	News	Social Issues	Overseas	Homosexuals	2008-06-12	2008-06-08	2008-06-01	2008	131	708, 710	2	沙拉保夫侮辱同志被斥垃圾	2.2
YD2008-152	Movie	Others-MSM related movies and TV series	HK	MSM	2008-06-13	2008-06-08	2008-06-01	2008	123	704	1	《無野之城》MSM related movie	1
YD2008-151	Movie	Others-MSM related movies and TV series	HK	MSM	2008-06-14	2008-06-08	2008-06-01	2008	123	700	1	《無野之城》MSM related movie	1
LPK2008-089	News	Sex-related crime	HK	MSM	2008-06-14	2008-06-08	2008-06-01	2008	82	698, 699	2	MSM commited sex-related crime	2.2
YD2008-149	News	Event	Mainland	Celebrity	2008-06-15	2008-06-15	2008-06-01	2008	129	694, 695	2	徐子淇帶女訪愛滋村種善心	2.2
YD2008-146	News	Surveys	HK	MSM	2008-06-16	2008-06-15	2008-06-01	2008	128	690-691	1	男同志逾四成有性障礙	1
YD2008-147	News	Event	Overseas	MSM	2008-06-16	2008-06-15	2008-06-01	2008	116	692	1	聖公會舉行同志牧師婚禮	1
YD2008-148	Movie	Others-MSM related movies and TV series	HK	MSM	2008-06-16	2008-06-15	2008-06-01	2008	123	693	1	《無野之城》MSM related movie	1
YD2008-145	News	Event	Overseas	General Public	2008-06-17	2008-06-15	2008-06-01	2008	127	686	1	怪客闖新聞直播二萬次 to help prevent HIV	2.2
YD2008-144	News	Event	Overseas	General Public	2008-06-18	2008-06-15	2008-06-01	2008	127	680	1	怪客闖新聞直播二萬次 to help prevent HIV	1
YD2008-142	News	HIV Surveillance	HK	PLHIV	2008-06-18	2008-06-15	2008-06-01	2008	125	673, 674, 677, 681	4	89宗愛滋病病毒感染及17宗愛滋病個案，同性性接觸仍是主要的感染途徑	2.2
LPK2008-086	News	Surveys	Overseas	Homosexuals	2008-06-18	2008-06-15	2008-06-01	2008	79	675, 676, 678	3	Some characteristics of homosexuals	2.2
YD2008-141	News	Event	Overseas	MSM	2008-06-19	2008-06-15	2008-06-01	2008	72	669, 670	2	《星空》領航員申請與男友結婚	1
YD2008-139	Movie	Others-MSM related movies and TV series	HK	MSM	2008-06-20	2008-06-15	2008-06-01	2008	123	664, 668	2	《無野之城》MSM related movie	1
YD2008-140	News	Event	Overseas	MSM	2008-06-20	2008-06-15	2008-06-01	2008	124	665	1	《小小小英國》男同志離婚	1
YD2008-138	Movie	Others-MSM related movies and TV series	HK	MSM	2008-06-21	2008-06-15	2008-06-01	2008	123	662	1	《無野之城》MSM related movie	1
YD2008-137	Editorial	Event	Overseas	Homosexuals	2008-06-23	2008-06-22	2008-06-01	2008	122	656	1	石牆騷亂	1
YD2008-134	News	Event	HK	General Public	2008-06-24	2008-06-22	2008-06-01	2008	119	651	1	市民投訴被警員截查時，被指是「同性戀」作人身攻擊	1
YD2008-135	News	Policy and Law	HK	MSM	2008-06-24	2008-06-22	2008-06-01	2008	120	653	1	與15歲學生肛交工人囚兩年	2.2
LPK2008-084	Editorial	Social Issues	HK	Homosexuals	2008-06-24	2008-06-22	2008-06-01	2008	77	654	1	Editor supported homosexuality	2.2
YD2008-132	News	HIV Prevention	Overseas	Celebrity	2008-06-27	2008-06-22	2008-06-01	2008	118	633	1	女子組合Destiny's Child 前成員Kelly Rowland 近日擔任MTV 活着基金首位親善大使，呼籲年輕人關注和對抗愛滋病	2.2
YD2008-133	News	Event	Mainland	Celebrity	2008-06-27	2008-06-22	2008-06-01	2008	117	637	1	蓋茨退休後的首項任務，是要到中國行善 including preventing AIDS	2.2
YD2008-130	News	Event	Overseas	MSM	2008-06-30	2008-06-29	2008-06-01	2008	116	620	1	同性戀牧師結婚惹不滿英聖公會分裂	1
LPK2008-081	Editorial	Social Issues	HK	Homosexuals	2008-06-30	2008-06-29	2008-06-01	2008	74	621	1	Article about homosexuality	1
LPK2008-080	News	Sex-related crime	HK	MSM	2008-07-02	2008-06-29	2008-07-01	2008	73	611	1	MSMs commited sex-related crimes	2.2
YD2008-128	Editorial	Event	HK	MSM	2008-07-03	2008-06-29	2008-07-01	2008	114	607	1	男男情慾	1
YD2008-127	News	Event	Overseas	MSM	2008-07-04	2008-06-29	2008-07-01	2008	113	603	1	Gays have sex with each other on the road	1
YD2008-126	News	Event	Overseas	MSM	2008-07-07	2008-07-06	2008-07-01	2008	112	593	1	匈牙利舉辦歐洲同性戀先生選舉	1
YD2008-125	News	Event	Mainland	MSM	2008-07-08	2008-07-06	2008-07-01	2008	111	587	1	王蒙疑曹雪芹為同性戀	1
YD2008-124	News	HIV Treatment	HK	PLHIV	2008-07-10	2008-07-06	2008-07-01	2008	110	582	1	《香港科學家中國之旅》 孔祥復—醫之源	1
YD2008-123	News	Event	Overseas	Celebrity	2008-07-12	2008-07-06	2008-07-01	2008	109	575	1	Alicia Keys's woke on fighting with AIDS	1
YD2008-122	News	Event	Overseas	Celebrity	2008-07-13	2008-07-13	2008-07-01	2008	109	571	1	Alicia Keys's woke on fighting with AIDS	1
YD2008-121	News	Event	Overseas	PLHIV	2008-07-14	2008-07-13	2008-07-01	2008	108	570	1	愛馬仕Life in a Pocket領帶 will help fight with AIDS	1
LPK2008-059	News	Social Issues	Overseas	PLHIV	2008-07-21	2008-07-20	2008-07-01	2008	52	554	1	German company sold a product for fundraising purpose and used to help AIDS patients	2.2
YD2008-119	News	Event	Overseas	MSM	2008-07-23	2008-07-20	2008-07-01	2008	106	551	1	美漢指聖經譯錯向出版社索償5.4億	1
YD2008-118	News	Event	HK	MSM	2008-07-24	2008-07-20	2008-07-01	2008	105	549	1	男同志性交書照賣影視處失職	1
YD2008-117	News	HIV Transmission or Risk	HK	MSM	2008-07-25	2008-07-20	2008-07-01	2008	104	546	1	Disease that may caused by anal sex	1
LPK2008-077	News	Sex-related crime	Taiwan	MSM	2008-07-25	2008-07-20	2008-07-01	2008	70	540	1	MSM commited sex-related crime	2.2
LPK2008-078	News	HIV Transmission or Risk	Overseas	PLHIV	2008-07-25	2008-07-20	2008-07-01	2008	71	541	1	HIV may spread in US	2.2
LPK2008-079	News	Social Issues	HK	Homosexuals	2008-07-25	2008-07-20	2008-07-01	2008	72	543	1	Books related to homosexuality are not allowed to sell in Hong Kong Book Fair	2.2
LPK2008-075	News	HIV testing	HK	PLHIV	2008-07-26	2008-07-20	2008-07-01	2008	68	536	1	Some reagents have false negative result in testing HIV	2.2
LPK2008-076	News	HIV Transmission or Risk	Taiwan	General public	2008-07-26	2008-07-20	2008-07-01	2008	69	537	1	AIDS may spread in Taiwan	2.2
LPK2008-074	News	Social Issues	Overseas	Homosexuals	2008-07-27	2008-07-27	2008-07-01	2008	67	532	1	An advertisment of Nike suspected to discriminating homosexuals	1
YD2008-111	News	HIV Treatment	Overseas	PLHIV	2008-07-27	2008-07-27	2008-07-01	2008	98	531	1	雞尾酒愛滋療法顯著延壽	2.2
YD2008-109	News	Event	Overseas	General Public	2008-07-28	2008-07-27	2008-07-01	2008	96	526	1	英國的「電單車男」駕車24000 里為愛滋病籌款	1
YD2008-110	News	Event	Overseas	Celebrity	2008-07-28	2008-07-27	2008-07-01	2008	97	528	1	「Couture Watch 」 aim to help the AIDS patients	1
YD2008-108	News	HIV Science	Overseas	General Public	2008-07-29	2008-07-27	2008-07-01	2008	95	521	1	感染寄生蟲與愛滋病毒有密切關係	2.2
YD2008-106	News	Event	Mainland	MSM	2008-08-04	2008-08-03	2008-08-01	2008	93	511	1	杭州搗同志淫窟拘逾40裸男	1
LPK2008-070	News	Others	Overseas	PLHIV	2008-08-04	2008-08-03	2008-08-01	2008	63	510	1	Insufficient health care workers to provide treatments for AIDS patients in the world	2.2
LPK2008-071	News	Other Statistics	Overseas	PLHIV	2008-08-04	2008-08-03	2008-08-01	2008	64	512	1	America forecasts number of AIDS cases will increase	2.2
LPK2008-069	News	HIV Science	Overseas	PLHIV	2008-08-05	2008-08-03	2008-08-01	2008	62	508	1	An anti-virus medicine is less effective in AIDS patients suffered from Tuberculosis simultaneously	1
LPK2008-068	News	HIV Transmission or Risk	HK	MSM	2008-08-06	2008-08-03	2008-08-01	2008	61	504	1	MSMs have a higher risk suffering from AIDS	2.2
YD2008-103	Movie	Others-MSM related movies and TV series	Overseas	MSM	2008-08-08	2008-08-03	2008-08-01	2008	53	497	1	《Taking Woodstock》MSM related movie	1
YD2008-100	News	HIV Prevention	Overseas	General Public	2008-08-08	2008-08-03	2008-08-01	2008	88	492	1	食粒丸防愛滋	2.2
YD2008-101	News	Social Issues	HK	Homosexuals	2008-08-08	2008-08-03	2008-08-01	2008	89	493, 496	2	同志團體抗議明光社歧視	2.2
YD2008-102	News	Surveys	HK	PLHIV	2008-08-08	2008-08-03	2008-08-01	2008	90	494	1	性病患者染愛滋高危	2.2
YD2008-099	News	Event	Overseas	Celebrity	2008-08-09	2008-08-03	2008-08-01	2008	87	491	1	松本潤柬埔寨探愛滋童	2.2
YD2008-098	News	HIV Prevention	HK	General Public	2008-08-12	2008-08-10	2008-08-01	2008	86	486	1	性行為應做足預防割包皮減染愛滋病60%	2.2
YD2008-097	News	HIV Science	Overseas	PLHIV	2008-08-14	2008-08-10	2008-08-01	2008	85	481	1	美婦染愛滋未發病	2.2
YD2008-096	News	Event	Overseas	MSM	2008-08-15	2008-08-10	2008-08-01	2008	84	475	1	Gay Parade	1
LPK2008-061	News	Policy and Laws	Overseas	Homosexuals	2008-08-18	2008-08-17	2008-08-01	2008	54	464, 465	2	Homosexuals are allowed to do sensitive government jobs	2.2
YD2008-094	News	Event	Overseas	MSM	2008-08-19	2008-08-17	2008-08-01	2008	79	460	2	澳洲金牌得主認同性戀	1
YD2008-093	News	HIV Transmission and Risks	HK	General Public	2008-08-21	2008-08-17	2008-08-01	2008	82	450, 451	1	試劑失效隨時輸錯愛滋血	2.2
LPK2008-057	News	Surveillance	Overseas	PLHIV	2008-08-21	2008-08-17	2008-08-01	2008	51	448	1	276 new AIDS cases in Japan and most of them are male	2.2
LPK2008-058	News	Social Issues	Overseas	PLHIV	2008-08-21	2008-08-17	2008-08-01	2008	52	449	1	German company sold a product for fundraising purpose and used to help AIDS patients	2.2
YD2008-090	News	Event	Overseas	MSM	2008-08-24	2008-08-24	2008-08-01	2008	79	436, 437	2	澳洲金牌得主認同性戀	1
YD2008-089	News	Event	HK	MSM	2008-08-30	2008-08-24	2008-08-01	2008	78	422	1	The first time that having sex with man	1
YD2008-088	News	Event	Taiwan	MSM	2008-09-02	2008-08-31	2008-09-01	2008	77	418	1	替同志求姻緣騙財騙色	1
YD2008-085	Movie	Others-MSM related movies and TV series	Overseas	MSM	2008-09-06	2008-08-31	2008-09-01	2008	7	395	1	《Milk 》MSM related movie	1
YD2008-086	Movie	Others-MSM related movies and TV series	Overseas	MSM	2008-09-06	2008-08-31	2008-09-01	2008	53	396	1	《Taking Woodstock》MSM related movie	1
YD2008-084	News	Event	Overseas	Celebrity	2008-09-08	2008-09-07	2008-09-01	2008	75	389, 392, 393	3	威廉哈里鐵馬闖非洲籌款	1
YD2008-083	Movie	Others-MSM related movies and TV series	Overseas	MSM	2008-09-11	2008-09-07	2008-09-01	2008	74	386	1	哈比人友誼未及牛仔情同志網友最愛《斷背山》	1
YD2008-081	News	Event	Overseas	MSM	2008-09-12	2008-09-07	2008-09-01	2008	72	372	1	《星空》領航員同志婚禮融和異族	1
YD2008-082	Movie	Others-MSM related movies and TV series	Overseas	MSM	2008-09-12	2008-09-07	2008-09-01	2008	73	379, 382	2	史提芬蘇德堡籌拍愛滋片	1
LPK2008-056	News	Celebrities	Overseas	Homosexuals	2008-09-16	2008-09-14	2008-09-01	2008	50	371	1	A pop star blamed a candidate of vice president about discriminating homosexuals	1
YD2008-080	News	Event	Overseas	MSM	2008-09-17	2008-09-14	2008-09-01	2008	71	369	1	迪尼路父親發現斷背即離婚	1
LPK2008-055	News	Others - Discrimination	Overseas	Celebrity	2008-09-17	2008-09-14	2008-09-01	2008	50	370	1	A pop star blamed a candidate of vice president about discriminating homosexuals	1
LPK2008-054	News	Surveillance	HK	PLHIV	2008-09-17	2008-09-14	2008-09-01	2008	49	364-366	3	121 New AIDS cases and number of MSM suffered from AIDS increased significantly	2.2
YD2008-077	News	HIV Transmission and Risks	Overseas	MSM	2008-09-19	2008-09-14	2008-09-01	2008	68	356	1	男同志服食治療陽痿藥物或濫用軟性毒品，會增加感染愛滋病毒的風險	2.2
YD2008-078	News	Event	Overseas	Homosexuals	2008-09-19	2008-09-14	2008-09-01	2008	69	357, 358	2	畢彼特捐款助同性戀結婚	2.2
YD2008-075	News	HIV Transmission and Risks	Overseas	General Public	2008-09-25	2008-09-21	2008-09-01	2008	66	338	1	共用針筒問題仍在	2.2
YD2008-076	News	Event	Overseas	Celebrity	2008-09-25	2008-09-21	2008-09-01	2008	67	339	1	史匹堡支持同性婚姻	2.2
YD2008-074	Movie	Others-MSM related movies and TV series	Overseas	MSM	2008-09-26	2008-09-21	2008-09-01	2008	65	337	1	《我要cake 一cake 》MSM related movie	1
LPK2008-049	News	HIV Vaccine	Overseas	General public	2008-10-02	2008-09-28	2008-10-01	2008	44	329	1	Research center of HIV vaccine will found in California	2.2
LPK2008-048	News	Other Statistics	Mainland China	PLHIV	2008-10-03	2008-09-28	2008-10-01	2008	43	327	1	Number of female suffered from AIDS in mainland doubled in 10 years	2.2
YD2008-071	News	HIV Test	Overseas	PLHIV	2008-10-06	2008-10-05	2008-10-01	2008	62	324	1	AIDS children in Africa and their HIV tests	1
YD2008-070	News	HIV Science	Overseas	General Public	2008-10-07	2008-10-05	2008-10-01	2008	61	321	1	法國籍科學家蒙塔尼耶和西諾西，找出導致愛滋病的人類免疫不全病毒（HIV ）而醫學諾獎	1
YD2008-069	Editorial	HIV Education and Awareness	Overseas	PLHIV	2008-10-07	2008-10-05	2008-10-01	2008	60	320	1	HIV─不治之症殺2500萬人	2.2
YD2008-068	News	HIV Science	Overseas	PLHIV	2008-10-08	2008-10-05	2008-10-01	2008	59	316	1	日本科學家利用細胞研究發現，提高「APOBEC」蛋白質抑制愛滋病病毒繁殖的能力	2.2
LPK2008-045	News	Celebrities	Overseas	MSM	2008-10-09	2008-10-05	2008-10-01	2008	40	312	1	A MSM Korean celebrity commited suicide due to stress from discrimination	1
YD2008-066	News	HIV Prevention	Overseas	General Public	2008-10-09	2008-10-05	2008-10-01	2008	57	308	1	割包皮無法預防愛滋	2.2
LPK2008-043	News	HIV Science	Overseas	General public	2008-10-10	2008-10-05	2008-10-01	2008	39	303	1	US researchers point out that no evidence prove that circumcision can reduce probability of HIV infection of male	2.2
YD2008-063	News	HIV Treatment	Overseas	PLHIV	2008-10-12	2008-10-12	2008-10-01	2008	56	294	1	莊遜嬲到震爆求醫苦況	2.2
YD2008-061	News	HIV Transmission and Risks	Overseas	PLHIV	2008-10-15	2008-10-12	2008-10-01	2008	54	290	1	荷三愛滋漢播病毒受審	2.2
YD2008-062	News	HIV Education and Awareness	HK	Celebrity	2008-10-15	2008-10-12	2008-10-01	2008	55	291	1	何韻詩訪非洲體會愛滋威脅	2.2
YD2008-060	Movie	Others-MSM related movies and TV series	Overseas	MSM	2008-10-17	2008-10-12	2008-10-01	2008	53	286	1	《Taking Woodstock》MSM related movie	1
YD2008-059	News	Event	Overseas	PLHIV	2008-10-20	2008-10-19	2008-10-01	2008	52	279	1	Historic HIV trial begins in Dutch city	1
LPK2008-039	News	HIV Transmission or Risk	Overseas	General public	2008-10-20	2008-10-19	2008-10-01	2008	36	279	1	Three men are accused of organising sex parties with the purpose of spreading the HIV virus	2.2
YD2008-057	News	HIV Surveillance	HK	PLHIV	2008-10-25	2008-10-19	2008-10-01	2008	50	266	1	截五越人蛇兩稱患愛滋	1
YD2008-056	News	HIV Transmission and Risks	Overseas	PLHIV	2008-10-25	2008-10-19	2008-10-01	2008	49	265	1	密蘇里州高中爆愛滋驚魂	2.2
YD2008-055	News	Surveys	Overseas	General Public	2008-10-27	2008-10-26	2008-10-01	2008	48	258, 261	2	英國一項調查顯示, 四成五人認為不應該准許同性戀者結婚	1
YD2008-054	News	Event	Overseas	Homosexuals	2008-10-30	2008-10-26	2008-10-01	2008	47	254	1	德國科隆的發展商為協助受歧視的同性戀者，正發展專供他們居住的住宅項目	1
YD2008-053	Movie	Others-MSM related movies and TV series	HK	MSM	2008-10-30	2008-10-26	2008-10-01	2008	7	252	1	《Milk 》MSM related movie	2.2
LPK2008-036	News	Other Statistics	Overseas	PLHIV	2008-10-30	2008-10-26	2008-10-01	2008	33	250	1	WHO predicted that number of deaths from AIDS will reduced	2.2
LPK2008-035	News	Other Statistics	Overseas	General public	2008-11-04	2008-11-02	2008-11-01	2008	32	238	1	Japanese condom usage rate is low and it may contribute to the increasing HIV cases	1
YD2008-051	News	Event	Overseas	Homosexuals	2008-11-04	2008-11-02	2008-11-01	2008	45	237	1	Sacha Baron Cohen rejected the demonstration for opposition of homosexual marriage	2.2
YD2008-048	TV series	Others-MSM related movies and TV series	HK	MSM	2008-11-07	2008-11-02	2008-11-01	2008	42	218-210, 223	4	《火星人》 MSM related TV series	1
YD2008-050	Movie	Others-MSM related movies and TV series	Overseas	MSM	2008-11-07	2008-11-02	2008-11-01	2008	8	226	1	《霜花店》MSM related movies	1
YD2008-049	News	Policy and Law	Overseas	Homosexuals	2008-11-07	2008-11-02	2008-11-01	2008	44	221	1	加州一千萬名居民大前日投票通過八號草案，禁止同性戀婚姻	2.2
YD2008-047	News	HIV Transmission and Risks	Mainland	General Public	2008-11-11	2008-11-09	2008-11-01	2008	22	198	1	港男北上嫖妓15％不戴套	2.2
YD2008-044	News	HIV Treatment	Overseas	PLHIV	2008-11-14	2008-11-09	2008-11-01	2008	39	183, 186, 190	3	骨髓移植奇蹟治愈愛滋病	2.2
YD2008-045	News	Event	HK	Celebrity	2008-11-14	2008-11-09	2008-11-01	2008	40	184-185, 187, 189	4	周慧敏關懷愛滋病童	2.2
YD2008-046	News	Event	Overseas	Celebrity	2008-11-14	2008-11-09	2008-11-01	2008	41	188	1	Joyce名師香水傳播愛	2.2
YD2008-043	News	Event	Overseas	Celebrity	2008-11-15	2008-11-09	2008-11-01	2008	38	182	1	歌手Alicia Keys 舉辦的第五屆Black Ball 慈善活動前日在紐約舉行，為兒童愛滋病機構籌款	1
YD2008-042	News	HIV Surveillance	Overseas	PLHIV	2008-11-19	2008-11-16	2008-11-01	2008	37	172	1	馬來西亞愛滋病醫學會指，該國的愛滋病患者有增加趨勢	2.2
YD2008-041	Movie	Others-MSM related movies and TV series	HK	MSM	2008-11-20	2008-11-16	2008-11-01	2008	7	170	1	《Milk 》MSM related movie	1
YD2008-040	News	Event	HK	Celebrity	2008-11-23	2008-11-23	2008-11-01	2008	36	154, 157	2	《童心同行愛之夜》節目錄影，為內地愛滋病童籌款	1
YD2008-038	Movie	Others-MSM related movies and TV series	Overseas	PLHIV	2008-11-24	2008-11-23	2008-11-01	2008	35	146	1	《毒海浮生》AIDS related movie	1
YD2008-039	News	Event	HK	General Public	2008-11-24	2008-11-23	2008-11-01	2008	26	152	1	雪花秀專門店 helped children in Mainland who are influenced by AIDS	1
YD2008-037	Movie	Others-MSM related movies and TV series	Overseas	MSM	2008-11-25	2008-11-23	2008-11-01	2008	8	144	1	《霜花店》MSM related movies	1
LPK2008-028	News	HIV Transmission or Risk	Overseas	PLHIV	2008-11-26	2008-11-23	2008-11-01	2008	25	140, 141	2	An American transmitted HIV to his wife and he is convicted	1
YD2008-035	News	HIV Test	Overseas	General Public	2008-11-27	2008-11-23	2008-11-01	2008	30	132	1	全民測試10年滅愛滋	2.2
YD2008-028	Editorial	HIV Education and Awareness	Overseas	PLHIV	2008-12-01	2008-11-30	2008-12-01	2008	27	116	1	了解、關懷3300萬人的故事	2.2
YD2008-029	News	Event	Mainland	Gov't officials	2008-12-01	2008-11-30	2008-12-01	2008	28	117	1	溫總探訪安徽愛滋村	2.2
YD2008-030	News	HIV Surveillance	Mainland	PLHIV	2008-12-01	2008-11-30	2008-12-01	2008	29	118, 120	2	中國今年愛滋個案逾4萬, 累計有26.4萬名愛滋病病毒感染者	2.2
YD2008-031	News	HIV Test	Overseas	General Public	2008-12-01	2008-11-30	2008-12-01	2008	30	119	1	全民測試10年滅愛滋	2.2
YD2008-032	News	HIV Treatment	Overseas	PLHIV	2008-12-01	2008-11-30	2008-12-01	2008	31	121	1	三合一藥丸減愛滋童痛苦	2.2
YD2008-033	News	Event	Mainland	Celebrity	2008-12-01	2008-11-30	2008-12-01	2008	32	122	1	Kylie為愛滋病患籌款	2.2
YD2008-034	News	Event	Overseas	Celebrity	2008-12-01	2008-11-30	2008-12-01	2008	33	124, 125	2	丹尼爾拍賣牛仔褲籌款	2.2
YD2008-026	News	Event	HK	Celebrity	2008-12-02	2008-11-30	2008-12-01	2008	25	107, 110, 115	3	「世界愛滋病日活動開展禮」	1
YD2008-027	News	Event	HK	General Public	2008-12-02	2008-11-30	2008-12-01	2008	26	113	1	雪花秀專門店 helped children in Mainland who are influenced by AIDS	1
LPK2008-013	News	HIV Education and Awareness	Mainland China	Others	2008-12-02	2008-11-30	2008-12-01	2008	12	101, 107	2	Hostesses in Canton learned to use condom	1
LPK2008-018	News	Celebrities	HK	PLHIV	2008-12-02	2008-11-30	2008-12-01	2008	16	115	1	Celebrities joined an event to appeal for public concern about AIDS patients	1
YD2008-023	News	Surveys	Mainland	General Public	2008-12-02	2008-11-30	2008-12-01	2008	22	102, 105	1	港男北上嫖妓15％不戴套	2.2
YD2008-024	News	HIV Surveillance	HK	PLHIV	2008-12-02	2008-11-30	2008-12-01	2008	23	103	1	本港愛滋病感染率 維持較低水平	2.2
YD2008-025	News	Event	Overseas	PLHIV	2008-12-02	2008-11-30	2008-12-01	2008	24	106	1	The horrible face of AIDS	2.2
YD2008-022	News	Event	Mainland	PLHIV	2008-12-03	2008-11-30	2008-12-01	2008	21	97, 100	2	河南調查比國記者遇襲案	1
YD2008-020	News	Social Issues	HK	PLHIV	2008-12-04	2008-11-30	2008-12-01	2008	19	88, 93	2	Dayi He talked about HIV	2.2
YD2008-021	News	Event	Overseas	Celebrity	2008-12-04	2008-11-30	2008-12-01	2008	20	91	1	桑田佳祐扮野造福愛滋病人	2.2
YD2008-018	News	Event	HK	Celebrity	2008-12-05	2008-11-30	2008-12-01	2008	17	79-81	3	港大昨向前美國總統克林頓(圖)及愛滋病專家何大一頒授名譽博士學位，以表揚兩人為全球防治愛滋病所作的貢獻	1
YD2008-017	News	HIV Surveillance	HK	PLHIV	2008-12-05	2008-11-30	2008-12-01	2008	16	75-78	4	愛滋新症119宗 男同志高危	2.2
LPK2008-009	News	Other Statistics	Overseas	PLHIV	2008-12-05	2008-11-30	2008-12-01	2008	8	83	1	HIV infection rate may increased by 30% after 3 years in Uganda	2.2
LPK2008-005	News	Events	HK	Homosexuals	2008-12-08	2008-12-07	2008-12-01	2008	4	70, 72	2	Homosexuals from Hong Kong, Taiwan and China demonstrate in Causeway Bay	2.2
LPK2008-007	News	HIV Vaccine	Overseas	General public	2008-12-08	2008-12-07	2008-12-01	2008	6	71	1	Scientist claimed that HIV vaccine can release within 5 years	2.2
LPK2008-006	News	Policy and Laws	HK	Homosexuals	2008-12-09	2008-12-07	2008-12-01	2008	5	68	1	Hong Kong government decided to include cohabitated homosexuals in Domestic and Cohabitation Relationships Violence Ordinance	1
YD2008-013	Editorial	Social Issues	HK	PLHIV	2008-12-10	2008-12-07	2008-12-01	2008	13	63	1	傘下的陽光, AIDS orphans related periodicals	1
YD2008-014	News	MSM-related crime	Taiwan	MSM	2008-12-10	2008-12-07	2008-12-01	2008	14	66	1	盜死者財物台中男同志肢解男友	1
YD2008-012	Movie	Others-MSM related movies and TV series	Overseas	MSM	2008-12-12	2008-12-07	2008-12-01	2008	12	55	1	《斷背山》MSM related movie	1
YD2008-011	News	Event	Overseas	Homosexuals	2008-12-14	2008-12-14	2008-12-01	2008	11	48	1	美州長結婚惹同性戀者示威	1
YD2008-010	News	Event	HK	Homosexuals	2008-12-14	2008-12-14	2008-12-01	2008	10	47, 49	2	第一屆香港同志大遊行	2.2
YD2008-009	News	Event	Overseas	Celebrity	2008-12-15	2008-12-14	2008-12-01	2008	9	45	1	Elton John愛滋病基金	1
YD2008-008	Movie	Others-MSM related movies and TV series	Overseas	MSM	2008-12-19	2008-12-14	2008-12-01	2008	8	36	1	《霜花店》MSM related movies	1
YD2008-007	Movie	Others-MSM related movies and TV series	HK	MSM	2008-12-21	2008-12-21	2008-12-01	2008	7	32	1	《Milk 》MSM related movie	1
LPK2008-003	News	HIV Science	Overseas	General public	2008-12-21	2008-12-21	2008-12-01	2008	3	33	1	Circumcision can reduce probability of HIV infection of male	1
YD2008-006	News	Event	HK	PLHIV	2008-12-22	2008-12-21	2008-12-01	2008	6	31	1	M.A.C每年都會邀請感染了愛滋病的兒童繪畫作品並製成聖誕卡及禮物卡	1
LPK2008-002	News	Social Issues	Overseas	Homosexuals	2008-12-25	2008-12-21	2008-12-01	2008	2	22	1	Pope said that homosexuals threaten the lives of human	2.2
YD2008-036	News	Policy and Law	Overseas	General Public	2008-12-26	2008-12-21	2008-12-01	2008	34	140, 141	2	美漢傳愛滋病予妻罰賠償	1
YD2008-003	News	Event	Mainland	MSM	2008-12-27	2008-12-21	2008-12-01	2008	3	14	1	南京警方在秦淮區破獲了一宗同性戀賣淫集團案，拘捕三十人，被捕男妓均是二十歲的青年	1
YD2008-002	News	Social Issues	HK	Homosexuals	2008-12-28	2008-12-28	2008-12-01	2008	2	10	1	Common couples and homosexual couples	1
YD2008-001	News	HIV Transmission and Risks	Mainland	General Public	2008-12-29	2008-12-28	2008-12-01	2008	1	6	1	Man revenged his ex-girlfriend in injecting HIV virus	2.2
YD2009-299	News	Social Issues	Overseas	Homosexuals	2009-01-02	2008-12-28	2009-01-01	2009	229	1256	1	意法例教廷通用 梵蒂岡不再盲從	1
SYT2009-026	News	HIV transmission or risk	Overseas	General public-Whoremasters	2009-01-03	2008-12-28	2009-01-01	2009	7	49	1	Prostitutes transmitting HIV during World Cup	1
SYT2009-016	News	Policy and Laws	HK	Homosexuals	2009-01-05	2009-01-04	2009-01-01	2009	3	1250,1252	2	Laws that protect MSM from suffering domestic violence	2.2
SYT2009-015	News	Policy and Laws	HK	Homosexuals	2009-01-06	2009-01-04	2009-01-01	2009	3	1248	1	Laws that protect MSM from suffering domestic violence	2.2
YD2009-294	News	HIV Transmission and Risks	HK	General Public	2009-01-07	2009-01-04	2009-01-01	2009	231	1243, 1246	2	植不潔牙隨時染梅毒愛滋	1
YD2009-295	News	Sex-related crime	HK	MSM	2009-01-07	2009-01-04	2009-01-01	2009	227	1244	1	濕蒸誘惑鋼琴家涉狎鬍鬚男	1
SYT2009-014	News	Policy and Laws	HK	Homosexuals	2009-01-07	2009-01-04	2009-01-01	2009	3	1245	1	Laws that protect MSM from suffering domestic violence	2.2
SYT2009-013	News	Policy and Laws	HK	Homosexuals	2009-01-09	2009-01-04	2009-01-01	2009	3	1236	1	Laws that protect MSM from suffering domestic violence	1
YD2009-293	News	Policy and Law	HK	Homosexuals	2009-01-11	2009-01-11	2009-01-01	2009	219	1228, 1230, 1231	3	家暴條例正反對壘 40宗教團體vs20同志組織	2.2
YD2009-291	Editorial	Event	Overseas	PLHIV	2009-01-21	2009-01-18	2009-01-01	2009	229	1207	1	布殊政府撥款一百五十億美元幫助非洲對付愛滋病, 規模之大, 史無前例	1
YD2009-292	News	Event	Overseas	MSM	2009-01-21	2009-01-18	2009-01-01	2009	230	1208	1	美新市長認與少年有性關係	1
SYT2009-011	Editorial	Policy and Laws	HK	Homosexuals	2009-01-23	2009-01-18	2009-01-01	2009	3	1201	1	Laws that protect MSM from suffering domestic violence	1
YD2009-290	News	Social Issues	HK	MSM	2009-01-23	2009-01-18	2009-01-01	2009	228	1201	1	RoadShow抽起男男「誤咀」MV歌手吳彤：社會歧視同志	1
SYT2009-180	News	Sex-related crime	HK	MSM	2009-01-23	2009-01-18	2009-01-01	2009	137	1199,1200	2	Piano teacher commiting a crime	2.2
YD2009-288	News	MSM-related crime	Overseas	MSM	2009-01-25	2009-01-25	2009-01-01	2009	226	1196, 1198	2	英國過氣歌手佐治童子（Boy George）因非法禁錮男妓，上周罪成被即時判監15個月	1
YD2009-285	News	Event	HK	PLHIV	2009-01-26	2009-01-25	2009-01-01	2009	224	1191	1	內地愛滋孤兒幸港人攬錫	1
SYT2009-010	Editorial	Policy and Laws	HK	Homosexuals	2009-01-26	2009-01-25	2009-01-01	2009	3	1192	1	Laws that protect MSM from suffering domestic violence	2.2
YD2009-283	News	Event	HK	PLHIV	2009-01-27	2009-01-25	2009-01-01	2009	224	1184	1	內地愛滋孤兒幸港人攬錫	1
YD2009-284	News	Others-MSM related movies	Overseas	MSM	2009-01-27	2009-01-25	2009-01-01	2009	92	1185, 1186	2	《夏菲米克的時代》MSM related movie	1
SYT2009-179	News	Events	Overseas	Homosexuals	2009-01-28	2009-01-25	2009-01-01	2009	136	1185	1	GLAAD Media Awards	1
YD2009-282	News	HIV Science	HK	PLHIV	2009-01-30	2009-01-25	2009-01-01	2009	223	1178	1	修改細胞基因醫AIDS	1
SYT2009-178	Editorial	Social Issues	HK	Homosexuals	2009-02-05	2009-02-01	2009-02-01	2009	135	1157	1	Opinion about homosexuals	2.2
YD2009-279	News	Others-MSM related movies	Overseas	MSM	2009-02-06	2009-02-01	2009-02-01	2009	92	1153, 1154	2	《夏菲米克的時代》MSM related movie	2.2
SYT2009-177	News	Events	Overseas	Celebrities	2009-02-07	2009-02-01	2009-02-01	2009	134	1152	1	Celebrity (Laetitia Casta) attending charity dinner to donate to AIDS Fund	2.2
YD2009-277	News	Policy and Laws	HK	Homosexuals	2009-02-09	2009-02-08	2009-02-01	2009	219	1146, 1147	2	家暴條例修訂支持者力撐同志觸發反宗教霸權大遊行	2.2
YD2009-276	News	HIV Surveilance	Overseas	PLHIV	2009-02-11	2009-02-08	2009-02-01	2009	222	1142	1	青少年染愛滋病飆升 in Thailand	2.2
YD2009-275	News	MSM-related crime	HK	MSM	2009-02-12	2009-02-08	2009-02-01	2009	221	1139	1	Computer technician had sex with a 14 years old boy	1
SYT2009-175	News	HIV transmission or risk	Overseas	General public-Periodontal disease patients	2009-02-13	2009-02-08	2009-02-01	2009	132	1133	1	Periodontal disease increasing the risk of HIV infection	2.2
SYT2009-174	News	HIV transmission or risk	Overseas	General public-Periodontal disease patients	2009-02-15	2009-02-15	2009-02-01	2009	132	1126	1	Periodontal disease increasing the risk of HIV infection	2.2
YD2009-269	News	HIV Prevention	Overseas	PLHIV	2009-02-16	2009-02-15	2009-02-01	2009	217	1117	1	布魯妮轟G8抗愛滋不力	1
YD2009-268	News	HIV Prevention	HK	General Public	2009-02-16	2009-02-15	2009-02-01	2009	216	1116	1	關懷愛滋義工安全司機成效理想	2.2
YD2009-270	News	HIV Surveilance	Overseas	PLHIV	2009-02-16	2009-02-15	2009-02-01	2009	218	1119	1	巴西政府公布的研究指，當地50歲以上感染愛滋病毒的婦女人數，在過去10年急增兩倍	2.2
YD2009-271	News	Policy and Law	HK	Homosexuals	2009-02-16	2009-02-15	2009-02-01	2009	219	1120, 1124, 1125	3	關注家庭暴力組織發起遊行，不滿有部分宗教人士、立法會議員反對港府修訂家暴條例，扼殺同性戀者人權	2.2
YD2009-272	News	Others-MSM related movies	Overseas	MSM	2009-02-16	2009-02-15	2009-02-01	2009	92	1123	1	《夏菲米克的時代》MSM related movie	2.2
YD2009-267	News	Others-MSM related movies	Overseas	MSM	2009-02-17	2009-02-15	2009-02-01	2009	92	1111	1	《夏菲米克的時代》MSM related movie	1
SYT2009-171	News	HIV Treatment	Overseas	PLHIV	2009-02-17	2009-02-15	2009-02-01	2009	129	1109	1	HIV treatment method	2.2
YD2009-265	News	Others-MSM related movies	Overseas	MSM	2009-02-18	2009-02-15	2009-02-01	2009	92	106	1	《夏菲米克的時代》MSM related movie	2.2
YD2009-264	News	Event	HK	MSM	2009-02-19	2009-02-15	2009-02-01	2009	214	1105	1	首宗同性戀者，因安排伴侶來港定居，而策劃的假結婚個案	1
SYT2009-167	News	HIV surveillance	HK	MSM	2009-02-19	2009-02-15	2009-02-01	2009	127	1101,1102	2	HIV transmission in MSM	2.2
YD2009-261	News	Event	Overseas	Celebrity	2009-02-21	2009-02-15	2009-02-01	2009	212	1095	1	親吻愛滋童布魯尼被喻新戴妃	1
YD2009-262	Movie	Others-MSM related movies	Overseas	MSM	2009-02-21	2009-02-15	2009-02-01	2009	92	1097	1	《夏菲米克的時代》MSM related movie	1
SYT2009-166	News	HIV Prevention	HK	MSM	2009-02-21	2009-02-15	2009-02-01	2009	126	1094	1	HIV Prevention in MSM	2.2
YD2009-258	News	Event	HK	Celebrity	2009-02-22	2009-02-22	2009-02-01	2009	209	1086	1	黃耀明獻新歌關懷愛滋	1
YD2009-259	News	Event	Overseas	PLHIV	2009-02-22	2009-02-22	2009-02-01	2009	210	1092	1	張艾嘉重返埃塞俄比亞——關懷與感動之旅	1
YD2009-257	News	Others-MSM related movies	Overseas	MSM	2009-02-24	2009-02-22	2009-02-01	2009	92	1072-1075	4	《夏菲米克的時代》MSM related movie	1
SYT2009-165	News	Sex-related crime	Mainland China	MSM	2009-02-25	2009-02-22	2009-02-01	2009	125	1064	1	Taiwan MSM commiting a cirme to Mainland Chinese male model	2.2
YD2009-254	Movie	Others-MSM related movies	Overseas	MSM	2009-02-26	2009-02-22	2009-02-01	2009	92	1056, 1057	2	《夏菲米克的時代》MSM related movie	1
YD2009-251	Movie	Social Issues	HK	Homosexuals	2009-03-01	2009-03-01	2009-03-01	2009	204	1046	1	有權相愛無權做愛	1
YD2009-252	News	Event	Overseas	PLHIV	2009-03-01	2009-03-01	2009-03-01	2009	205	1047	1	愛滋血信件寄給奧巴馬	1
YD2009-253	News	Event	Taiwan	Homosexuals	2009-03-01	2009-03-01	2009-03-01	2009	206	1048, 1049	2	同志團體聲援小馬哥	1
YD2009-249	Editorial	Social Issues	HK	MSM	2009-03-02	2009-03-01	2009-03-01	2009	203	1041	1	基佬又如何？	1
YD2009-250	Movie	Others-MSM related movies	Overseas	MSM	2009-03-02	2009-03-01	2009-03-01	2009	92	1042	1	《夏菲米克的時代》MSM related movie	1
YD2009-248	News	HIV Treatment	HK	PLHIV	2009-03-03	2009-03-01	2009-03-01	2009	202	1040	1	患愛滋病越南人從內地偷渡來港博取免費醫療服務的問題嚴重	1
YD2009-247	News	HIV Surveilance	HK	PLHIV	2009-03-04	2009-03-01	2009-03-01	2009	201	1032-1034, 1036	4	愛滋病感染創24年新高	2.2
YD2009-244	News	HIV Prevention	HK	General Public	2009-03-07	2009-03-01	2009-03-01	2009	198	1020	1	政府資助愛滋網站宣揚吸毒	1
YD2009-245	News	Event	Overseas	Celebrity	2009-03-07	2009-03-01	2009-03-01	2009	199	1022	1	「天使膳食計劃」AIDS concern conference	1
YD2009-246	News	Policy and Law	HK	MSM	2009-03-07	2009-03-01	2009-03-01	2009	200	1025	1	與男生肛交IT人囚三年	2.2
YD2009-243	News	HIV Surveilance	Mainland	PLHIV	2009-03-08	2009-03-08	2009-03-01	2009	197	1016	1	河南逾4萬人染愛滋	2.2
YD2009-242	Movie	Others-MSM related movies	Overseas	Homosexuals	2009-03-13	2009-03-08	2009-03-01	2009	196	1006	1	《春光乍洩》homosexuals related movie	1
YD2009-241	News	Others-MSM related movies	Overseas	MSM	2009-03-16	2009-03-15	2009-03-01	2009	129	999	1	《Little Ashes 》 MSM related movie	2.2
SYT2009-160	News	HIV transmission or risk	Overseas	PLHIV	2009-03-17	2009-03-15	2009-03-01	2009	120	996	1	HIV-infected taxi driver transmitting HIV in Korea	2.2
SYT2009-159	News	Events	Overseas	Homosexuals	2009-03-19	2009-03-15	2009-03-01	2009	119	995	1	Mardi Gras homosexuals parade in Sydney	1
YD2009-239	News	HIV Prevention	Overseas	PLHIV	2009-03-19	2009-03-15	2009-03-01	2009	181	994	1	教宗：避孕套無助遏止愛滋	1
YD2009-238	News	HIV Prevention	Overseas	PLHIV	2009-03-20	2009-03-15	2009-03-01	2009	181	986	1	教宗訪喀麥隆言論招炮轟	1
YD2009-236	Movie	Others-MSM related movies	Mainland	MSM	2009-03-21	2009-03-15	2009-03-01	2009	193	984	1	《誌同志》 MSM related movie	1
SYT2009-148	Others-songs	Others-songs	HK	General public	2009-03-21	2009-03-15	2009-03-01	2009	108	985	1	HIV prevention song entitled "照做"	2.2
YD2009-235	News	HIV Surveilance	Overseas	PLHIV	2009-03-22	2009-03-22	2009-03-01	2009	192	979	1	禁安全套害人全家	1
YD2009-234	News	Event	Overseas	General Public	2009-03-24	2009-03-22	2009-03-01	2009	191	974	1	法國一群支持教宗的右翼示威者和正在派發避孕套的關注愛滋病團體成員爆發衝突	1
YD2009-233	News	HIV Prevention	Overseas	General Public	2009-03-25	2009-03-22	2009-03-01	2009	190	971	1	中國安全套夠平助窮國對抗愛滋	1
SYT2009-158	News	HIV surveillance	Overseas	General public- Tuberculosis patients	2009-03-26	2009-03-22	2009-03-01	2009	118	967	1	HIV and Tuberculosis double infection becoming more serious	1
YD2009-231	News	Social issues	Mainland	PLHIV	2009-03-26	2009-03-22	2009-03-01	2009	188	965, 966	1	愛滋針黨敲詐東莞醫院	2.2
SYT2009-083	News	HIV Prevention	Overseas	General public-male	2009-03-27	2009-03-22	2009-03-01	2009	56	961,963,964	3	Circumcision decreasing HIV infection risk	2.2
YD2009-229	Movie	Others-MSM related movies	Overseas	MSM	2009-03-28	2009-03-22	2009-03-01	2009	76	959	1	《Taking Woodstock》MSM related movie	1
SYT2009-156	News	Events	Overseas	Celebrities	2009-03-30	2009-03-29	2009-03-01	2009	116	956	1	20th GLAAD Media Awards	2.2
YD2009-227	News	Event	Overseas	MSM	2009-04-01	2009-03-29	2009-04-01	2009	186	950	1	Gay committed muder and wrote song in order to atone himself	1
SYT2009-155	News	Sex-related crime	HK	MSM	2009-04-03	2009-03-29	2009-04-01	2009	115	947	1	Teenager commiting a crime	2.2
YD2009-225	News	Event	Mainland	MSM	2009-04-05	2009-04-05	2009-04-01	2009	184	944	1	俊男開同志鴨店百人面試	2.2
YD2009-224	News	Event	HK	Celebrity	2009-04-09	2009-04-05	2009-04-01	2009	183	932, 933	2	Annie來港獻唱 for AIDS patients	2.2
YD2009-223	News	HIV Prevention	HK	Celebrity	2009-04-10	2009-04-05	2009-04-01	2009	182	931	1	連凱早前應邀為慈善機構Aids Concern設計了四款漫畫	1
YD2009-222	News	HIV Prevention	Overseas	PLHIV	2009-04-12	2009-04-12	2009-04-01	2009	181	929	1	天主教教宗本篤十六世訪問非洲後，說要應付愛滋病，不應倚靠安全套，該從道德着手	1
YD2009-221	Movie	Others-MSM related movies	Overseas	MSM	2009-04-13	2009-04-12	2009-04-01	2009	153	927	1	《霜花店：王的男人》MSM related movie	2.2
YD2009-220	Movie	Others-MSM related movies	HK	MSM	2009-04-14	2009-04-12	2009-04-01	2009	179	921	1	《張某》MSM related MV	1
SYT2009-153	News	Others-book	Overseas	Homosexuals	2009-04-15	2009-04-12	2009-04-01	2009	113	917	1	Amazon removing homosexuals book from best seller	2.2
YD2009-218	Movie	Others-MSM related movies	HK	MSM	2009-04-16	2009-04-12	2009-04-01	2009	179	915	1	《張某》MSM related MV	1
SYT2009-141	News	Sex-related crime	HK	MSM	2009-04-16	2009-04-12	2009-04-01	2009	105	910	1	Teenager commiting a crime	2.2
SYT2009-152	News	HIV transmission or risk	Overseas	PLHIV	2009-04-16	2009-04-12	2009-04-01	2009	112	909,914	2	Celebrity (Nadja Benaissa) transmitting HIV to others deliberately	2.2
YD2009-215	News	Event	Overseas	MSM	2009-04-17	2009-04-12	2009-04-01	2009	176	905	1	《留心那話兒》 MSM related movie	1
SYT2009-151	News	Social Issues	HK	Homosexuals	2009-04-19	2009-04-19	2009-04-01	2009	111	896,898,899	3	CityU blockading homosexuals website	2.2
YD2009-213	News	Event	HK	PLHIV	2009-04-20	2009-04-19	2009-04-01	2009	174	894	1	肝炎義工關顧愛滋病人12載	2.2
SYT2009-149	News	Surveys	Overseas	PLHIV	2009-04-21	2009-04-19	2009-04-01	2009	109	892	1	The probability of HIV-infected pregnant women delivering babies increasing	2.2
SYT2009-137	News	Sex-related crime	HK	MSM	2009-04-23	2009-04-19	2009-04-01	2009	103	884	1	Gay teacher commiting a crime to three boys	2.2
SYT2009-147	Others-songs	Others-songs	HK	General public	2009-04-24	2009-04-19	2009-04-01	2009	108	881	1	HIV prevention song entitled "照做"	1
YD2009-210	Movie	Others-MSM related movies	HK	MSM	2009-04-24	2009-04-19	2009-04-01	2009	166	882	1	《永久居留》 MSM related movie	2.2
YD2009-209	Movie	Others-MSM related movies	HK	MSM	2009-04-28	2009-04-26	2009-04-01	2009	166	868	1	《永久居留》 MSM related movie	2.2
YD2009-208	News	Event	Overseas	Celebrity	2009-05-01	2009-04-26	2009-05-01	2009	171	859, 860	2	Annie Lennox care about AIDS patients in Africa	2.2
SYT2009-143	News	Celebrities	HK	General public	2009-05-04	2009-05-03	2009-05-01	2009	106	850,851,852	3	Celebrity(Annie Lennox) holding donation activity in HK	2.2
SYT2009-140	News	Sex-related crime	HK	MSM	2009-05-06	2009-05-03	2009-05-01	2009	105	845	1	Teenager commiting a crime	2.2
SYT2009-139	News	HIV testing	Overseas	General public	2009-05-07	2009-05-03	2009-05-01	2009	104	842,843	2	New HIV testing method	1
SYT2009-138	News	Sex-related crime	Overseas	MSM	2009-05-08	2009-05-03	2009-05-01	2009	103	838,840	2	Gay student commiting a crime to three boys	2.2
YD2009-204	News	HIV Transmission and Risks	Mainland	PLHIV	2009-05-10	2009-05-10	2009-05-01	2009	168	831	1	花兩萬買了個緬甸愛滋妻	1
SYT2009-136	News	Sex-related crime	HK	MSM	2009-05-14	2009-05-10	2009-05-01	2009	103	821	1	Gay teacher commiting a crime to three boys	2.2
YD2009-202	Movie	Others-MSM related movies	HK	MSM	2009-05-15	2009-05-10	2009-05-01	2009	166	817	1	《永久居留》MSM related movie	1
SYT2009-135	Movies	Movies	Mainland China	MSM	2009-05-15	2009-05-10	2009-05-01	2009	102	815,816,819	3	Mainland China MSM movie entitled "春風沉醉的晚上"	2.2
YD2009-199	Movie	HIV educationa and Awareness	Overseas	PLHIV	2009-05-16	2009-05-10	2009-05-01	2009	165	812	1	《Precious》AIDS related movie	1
SYT2009-134	Movies	Movies	Mainland China	MSM	2009-05-16	2009-05-10	2009-05-01	2009	102	813	1	Mainland China MSM movie entitled "春風沉醉的晚上"	2.2
SYT2009-130	News	Events	HK	Homosexuals	2009-05-18	2009-05-17	2009-05-01	2009	99	801,804	2	Gay Parade	2.2
YD2009-197	News	Event	Overseas	Celebrity	2009-05-18	2009-05-17	2009-05-01	2009	164	802, 803, 805	3	歐洲愛滋病基金籌款的第17屆生命晚會	2.2
YD2009-198	Movie	Others-MSM related movies	Overseas	MSM	2009-05-18	2009-05-17	2009-05-01	2009	153	806	2	《霜花店：王的男人》MSM related movie	2.2
SYT2009-129	News	HIV Vaccine	Overseas	General public	2009-05-19	2009-05-17	2009-05-01	2009	98	793	1	HIV Vaccine research making progress	2.2
SYT2009-128	News	HIV Prevention	Overseas	General public	2009-05-20	2009-05-17	2009-05-01	2009	97	783	1	Green tea can help HIV prevention	2.2
YD2009-193	Movie	Others-MSM related movies	Taiwan	MSM	2009-05-21	2009-05-17	2009-05-01	2009	137	781	1	《MW 毒氣風暴》MSM related movie	1
YD2009-192	News	Event	Overseas	MSM	2009-05-22	2009-05-17	2009-05-01	2009	160	777	1	德州斷背市長辭官陪男伴	1
YD2009-191	Movie	Others-MSM related movies	HK	MSM	2009-05-26	2009-05-24	2009-05-01	2009	159	762	1	《春風沉醉的夜晚》MSM related movie	1
YD2009-190	News	Event	HK	Celebrity	2009-05-26	2009-05-24	2009-05-01	2009	158	761	1	以時尚抗愛滋H&M與巨星	2.2
SYT2009-125	News	Social Issues	Overseas	PLHIV	2009-05-27	2009-05-24	2009-05-01	2009	94	756	1	PLHIV were branded on buttocks	2.2
SYT2009-126	News	HIV surveillance	HK	PLHIV	2009-05-27	2009-05-24	2009-05-01	2009	95	757-760	4	HIV surveillance results in HK	2.2
SYT2009-124	News	Policy and Laws	Overseas	Homosexuals	2009-05-28	2009-05-24	2009-05-01	2009	93	755	1	Same sex marriage(laws), spanned several countries	2.2
YD2009-186	Movie	Others-MSM related movies	HK	MSM	2009-05-31	2009-05-31	2009-05-01	2009	154	751	1	《無野之城》和《永久居留》MSM related movie	1
YD2009-185	News	Others-MSM related movies	Overseas	MSM	2009-06-01	2009-05-31	2009-06-01	2009	153	749	1	《霜花店 ── 朕的男人》MSM related movie	1
YD2009-184	News	HIV Science	Overseas	PLHIV	2009-06-01	2009-05-31	2009-06-01	2009	152	746	1	割包皮助預防愛滋病	2.2
YD2009-183	News	Policy and Law	HK	Homosexuals	2009-06-04	2009-05-31	2009-06-01	2009	151	739-742, 744	5	政府終讓步各方表支持 家暴條例保障同性同居	2.2
SYT2009-122	News	Social Issues	Overseas	Homosexuals	2009-06-05	2009-05-31	2009-06-01	2009	91	733	1	Harvard setting homosexuals professor post	2.2
SYT2009-123	News	HIV testing	Overseas	General public	2009-06-05	2009-05-31	2009-06-01	2009	92	734	1	Easy HIV test method	2.2
SYT2009-121	News	HIV Treatment	Overseas	PLHIV	2009-06-07	2009-06-07	2009-06-01	2009	90	728,729	2	A boy who was infected HIV by his father are survived now	2.2
YD2009-179	News	Event	Overseas	Celebrity	2009-06-09	2009-06-07	2009-06-01	2009	147	726	1	Miley義演助抗愛滋	2.2
YD2009-178	News	Event	Mainland	PLHIV	2009-06-10	2009-06-07	2009-06-01	2009	146	724, 725	2	相冊義賣助內地愛滋遺孤	1
SYT2009-119	News	Social Issues	Mainland China	Homosexuals	2009-06-12	2009-06-07	2009-06-01	2009	88	710	1	Homosexuals organization are against filtering software that filters homosexuals information	1
SYT2009-118	News	Others-volunteers	Mainland China	Others-HIV orphans	2009-06-13	2009-06-07	2009-06-01	2009	87	708	1	Album sale to donate for HIV orphans in Mainland China	2.2
YD2009-176	Movie	Others-MSM related movies	Overseas	MSM	2009-06-18	2009-06-14	2009-06-01	2009	136	700	1	《Bruno》MSM related movie	2.2
YD2009-175	Movie	Others-MSM related movies	Overseas	MSM	2009-06-19	2009-06-14	2009-06-01	2009	145	699	1	《暗戀》MSM related MV	1
SYT2009-116	News	Policy and Laws	Overseas	MSM	2009-06-22	2009-06-21	2009-06-01	2009	85	693	1	A MSM father taking his partner to meet his children	2.2
SYT2009-115	News	HIV Treatment	Overseas	PLHIV	2009-06-23	2009-06-21	2009-06-01	2009	84	690,691	2	New HIV treatment method	2.2
YD2009-172	News	Event	Overseas	Homosexuals	2009-06-26	2009-06-21	2009-06-01	2009	142	678, 679	2	美国教会驅逐「同性戀魔鬼」vedio released on Youtube	1
SYT2009-114	News	Events	Overseas	MSM	2009-06-27	2009-06-21	2009-06-01	2009	83	675	1	Gay Parade	2.2
YD2009-170	News	HIV Test	Overseas	General Public	2009-06-29	2009-06-28	2009-06-01	2009	140	673	1	青年測試愛滋比率低	2.2
SYT2009-112	News	HIV Science	Overseas	PLHIV	2009-07-02	2009-06-28	2009-07-01	2009	81	665	1	BCG is dangerous to HIV-infected infant	2.2
YD2009-168	News	HIV Transmission and Risks	HK	PLHIV	2009-07-03	2009-06-28	2009-07-01	2009	138	660	1	Ben met Mimi in the bar and had sex with her many times, lately he found her was infected with HIV	1
YD2009-166	Movie	Others-MSM related movies	Overseas	MSM	2009-07-04	2009-06-28	2009-07-01	2009	136	655	1	《Bruno》MSM related movie	1
YD2009-167	Movie	Others-MSM related movies	Taiwan	MSM	2009-07-04	2009-06-28	2009-07-01	2009	137	656	1	《MW 毒氣風暴》MSM related movie	1
YD2009-165	News	Event	HK	MSM	2009-07-05	2009-07-05	2009-07-01	2009	135	653	1	MSM story	1
YD2009-164	Movie	Others-MSM related movies	Overseas	MSM	2009-07-06	2009-07-05	2009-07-01	2009	134	648	1	「連續劇CD」MSM related movie	1
YD2009-163	News	Social Issues	Mainland	PLHIV	2009-07-07	2009-07-05	2009-07-01	2009	133	645	1	愛滋夫妻鬧診所討錢	1
YD2009-162	News	HIV Science	Overseas	PLHIV	2009-07-10	2009-07-05	2009-07-01	2009	132	638	1	愛滋病損抗結核桿菌系統	1
YD2009-160	News	HIV Transmission and Risks	Overseas	PLHIV	2009-07-13	2009-07-12	2009-07-01	2009	130	632, 634	2	6球星亂搞1愛滋女	1
YD2009-161	News	Social Issues	Overseas	PLHIV	2009-07-13	2009-07-12	2009-07-01	2009	131	633	1	無藥可根治愛滋運動員受排擠	1
YD2009-159	Movie	Others - AIDS-related movies	Overseas	MSM	2009-07-14	2009-07-12	2009-07-01	2009	129	628	1	《Little Ashes》AIDS related movie	1
YD2009-158	News	HIV Science	Overseas	PLHIV	2009-07-15	2009-07-12	2009-07-01	2009	128	626	1	美國科學家表示，女性感染HIV病毒，發展為愛滋病，較男性為快，原因是受荷爾蒙的影響	2.2
YD2009-157	Movie	Others-MSM related movies	HK	MSM	2009-07-17	2009-07-12	2009-07-01	2009	127	622	1	《無聲風鈴》MSM related movie	1
YD2009-156	Movie	HIV educationa and Awareness	Overseas	PLHIV	2009-07-19	2009-07-19	2009-07-01	2009	126	614	1	《神啊！請多給我一點時間》 AIDS related movie	1
YD2009-155	News	HIV Treatment	Overseas	PLHIV	2009-07-20	2009-07-19	2009-07-01	2009	125	600, 601	2	紅參治愛滋	2.2
SYT2009-108	News	Sex-related crime	HK	MSM	2009-07-21	2009-07-19	2009-07-01	2009	78	595,599	2	Teacher gay commiting a crime	2.2
SYT2009-109	News	HIV Treatment	Overseas	PLHIV	2009-07-21	2009-07-19	2009-07-01	2009	79	596	1	Red ginseng can cure HIV	2.2
YD2009-152	News	HIV Transmission and Risks	Overseas	MSM	2009-07-21	2009-07-19	2009-07-01	2009	123	594	1	英國醫學雜誌《刺針》發表的研究顯示，同性戀和雙性戀男性感染愛滋病毒HIV的比率，較一般男性高10倍	2.2
YD2009-151	News	HIV Transmission and Risks	Overseas	MSM	2009-07-22	2009-07-19	2009-07-01	2009	123	584	1	英國醫學雜誌《刺針》發表的研究顯示，同性戀和雙性戀男性感染愛滋病毒HIV的比率，較一般男性高10倍	2.2
YD2009-150	News	HIV Science	Overseas	Others - Gorillas	2009-07-24	2009-07-19	2009-07-01	2009	122	575	1	黑猩猩會愛滋病發	1
SYT2009-105	News	Social Issues	HK	MSM	2009-07-24	2009-07-19	2009-07-01	2009	76	574	1	Taiwan bookseller sold MSM por books	2.2
SYT2009-104	News	Social Issues	HK	MSM	2009-07-25	2009-07-19	2009-07-01	2009	76	570	1	Taiwan bookseller sold MSM por books	2.2
SYT2009-102	News	HIV Treatment	Overseas	PLHIV	2009-07-27	2009-07-26	2009-07-01	2009	74	561	1	PLHIV lacking fund and medicine in Africa	2.2
SYT2009-101	News	HIV Treatment	Overseas	PLHIV	2009-07-28	2009-07-26	2009-07-01	2009	74	556	1	PLHIV lacking fund and medicine in Africa	2.2
SYT2009-103	News	HIV transmission or risk	Overseas	MSM	2009-07-28	2009-07-26	2009-07-01	2009	75	557	1	Young MSM is HIV high risk group	2.2
SYT2009-099	News	Social Issues	Overseas	MSM	2009-07-29	2009-07-26	2009-07-01	2009	72	552	1	MSM in British army	2.2
SYT2009-100	News	Social Issues	Overseas	Celebrity	2009-07-29	2009-07-26	2009-07-01	2009	73	553	1	Celebrity(Marc Jacobs) supporting homosexuals legalization	2.2
YD2009-142	News	HIV Surveilance	Mainland	PLHIV	2009-07-29	2009-07-26	2009-07-01	2009	117	551	1	河南愛滋患者突破44500人	2.2
YD2009-141	News	HIV educationa and Awareness	HK	General Public	2009-07-31	2009-07-26	2009-07-01	2009	109	547	1	愛滋T恤系列	1
YD2009-140	News	Event	HK	MSM	2009-08-02	2009-08-02	2009-08-01	2009	114	545, 546	2	兩內地男涉違逗留例賣淫	1
YD2009-139	News	Event	Overseas	MSM	2009-08-03	2009-08-02	2009-08-01	2009	116	541, 543, 544	3	以國同志酒吧遇襲14死傷	2.2
YD2009-137	News	Event	HK	MSM	2009-08-04	2009-08-02	2009-08-01	2009	114	537, 539	2	兩內地男涉違逗留例賣淫	1
SYT2009-096	News	HIV Science	Overseas	PLHIV	2009-08-04	2009-08-02	2009-08-01	2009	69	536,538,540	3	New HIV virus	2.2
YD2009-136	News	Surveys	HK	Homosexuals	2009-08-05	2009-08-02	2009-08-01	2009	113	533	1	The acceptance level of homosexuals in HK	1
YD2009-135	News	HIV educationa and Awareness	HK	General Public	2009-08-06	2009-08-02	2009-08-01	2009	109	529, 530	2	愛滋T恤系列	1
SYT2009-095	News	Others	Overseas	Homosexuals	2009-08-10	2009-08-09	2009-08-01	2009	68	520	1	American psychologists are opposed to reagard homosexuals as illness	1
SYT2009-094	News	HIV surveillance	Overseas	PLHIV	2009-08-11	2009-08-09	2009-08-01	2009	67	518	1	HIV death rate decreases in Indonesia	2.2
[truncated: 2,067 more rows]
